# Supplementary material for: Genome-wide association analysis for quantitative trait loci influencing Warner–Bratzler shear force in five taurine cattle breeds
Source: PubMed Central journal article supplement (PMC3506923; doi:10.1111/j.1365-2052.2012.02323.x), 2012-02-27

**Figure S1.** Manhattan plots of normalized SNP allele substitution effects for each breed.

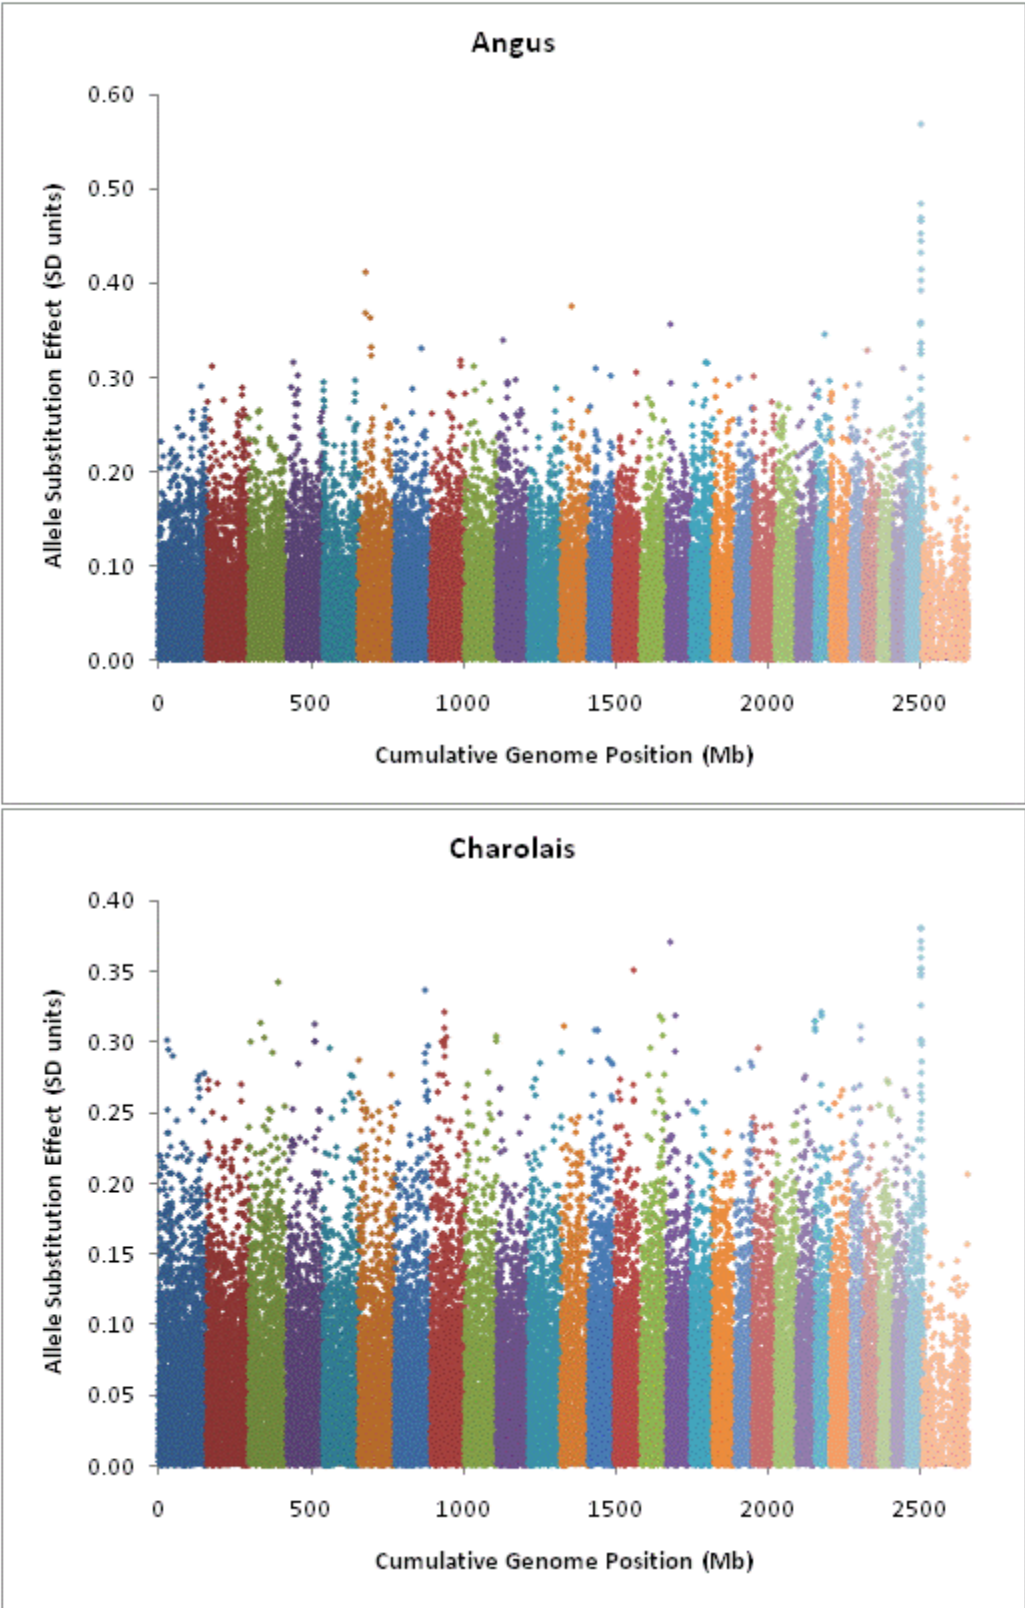

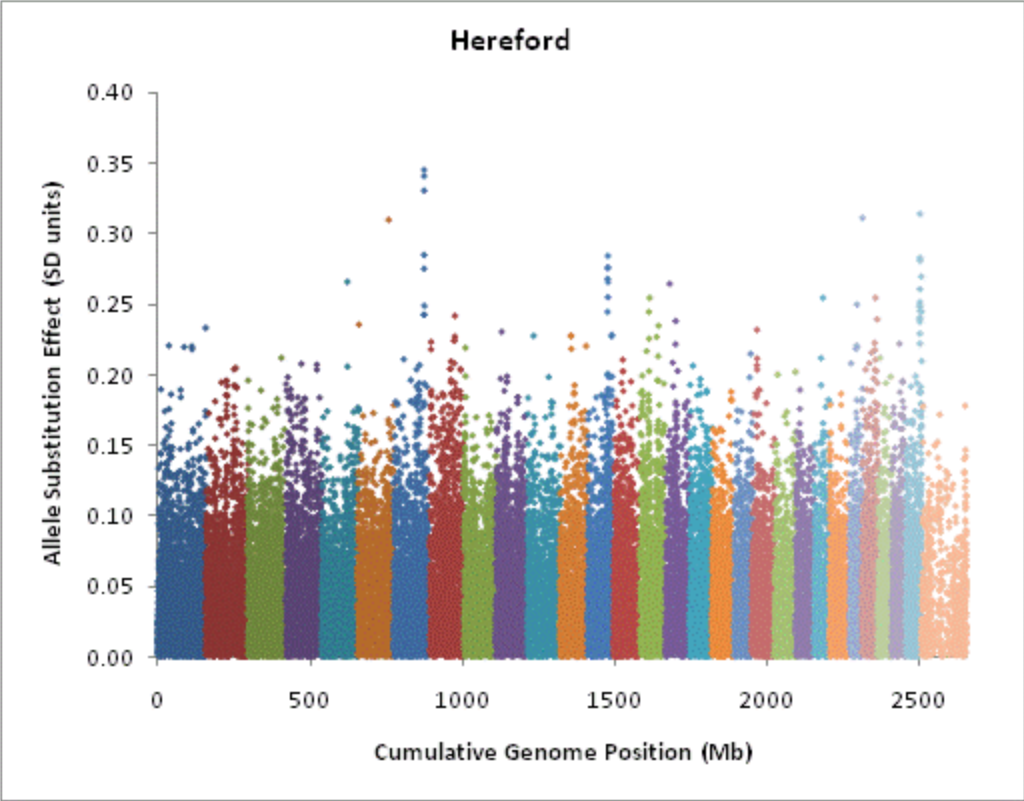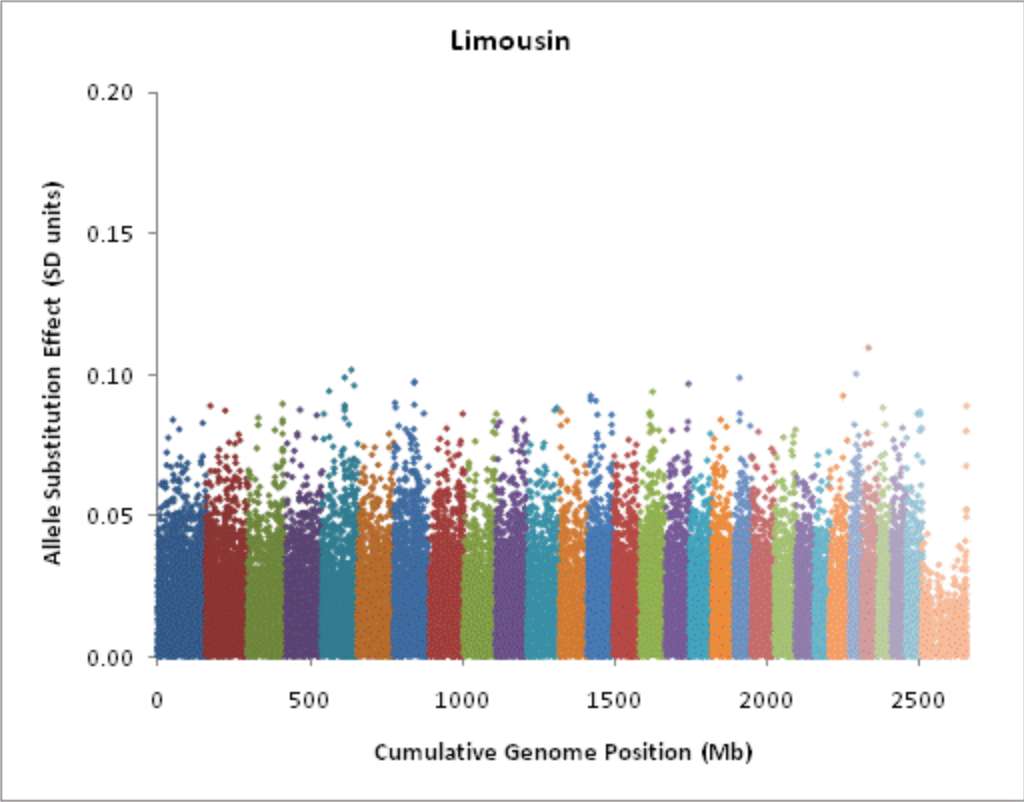

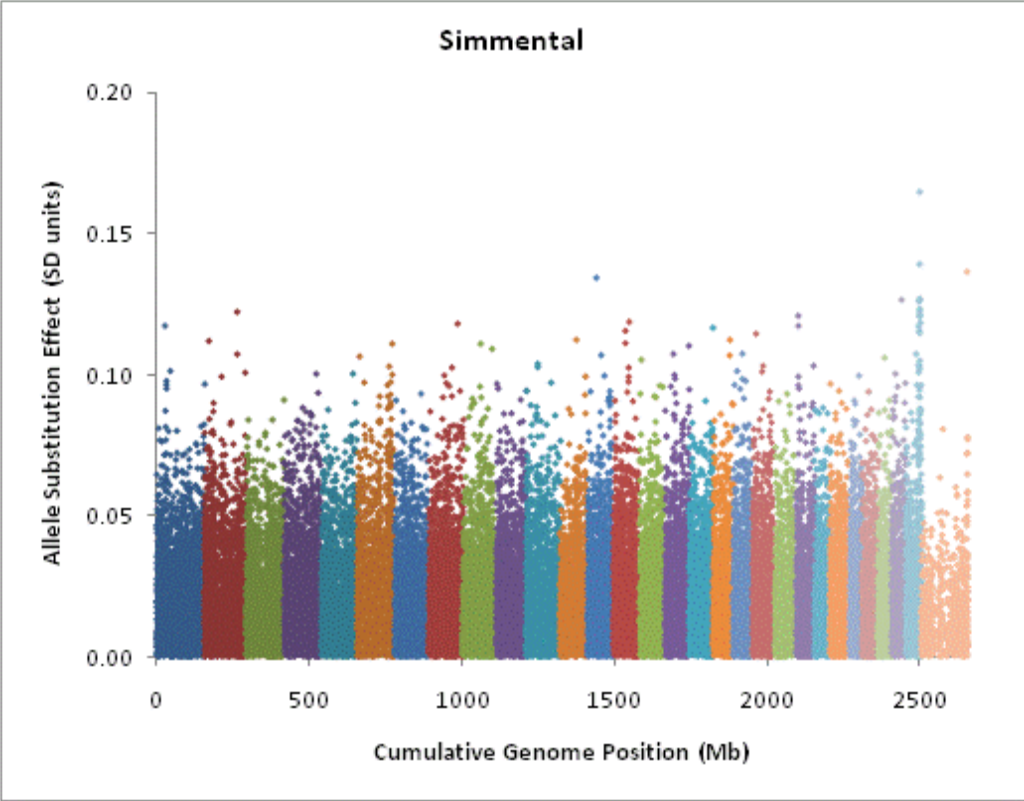

Supplement: age0043-0662-sd1.pdf [file age0043-0662-sd1.pdf]
