# Supplementary material for: Genome-wide association analysis for quantitative trait loci influencing Warner–Bratzler shear force in five taurine cattle breeds
Source: PubMed Central journal article supplement (PMC3506923; doi:10.1111/j.1365-2052.2012.02323.x), 2012-02-27
Supplement: age0043-0662-sd2.pdf [file age0043-0662-sd2.pdf]

**Figure S2** Linkage disequilibrium (LD) plots ( $r^2$ ) created in Haploview v4.1 (Barrett *et al.* 2005) for 44 SNP spanning 2.86 Mb centered on *CAST* on BTA7. Darker shading indicates regions of higher LD. The commercially tested SNP, *rs4125587*, (#22) is highlighted in green.

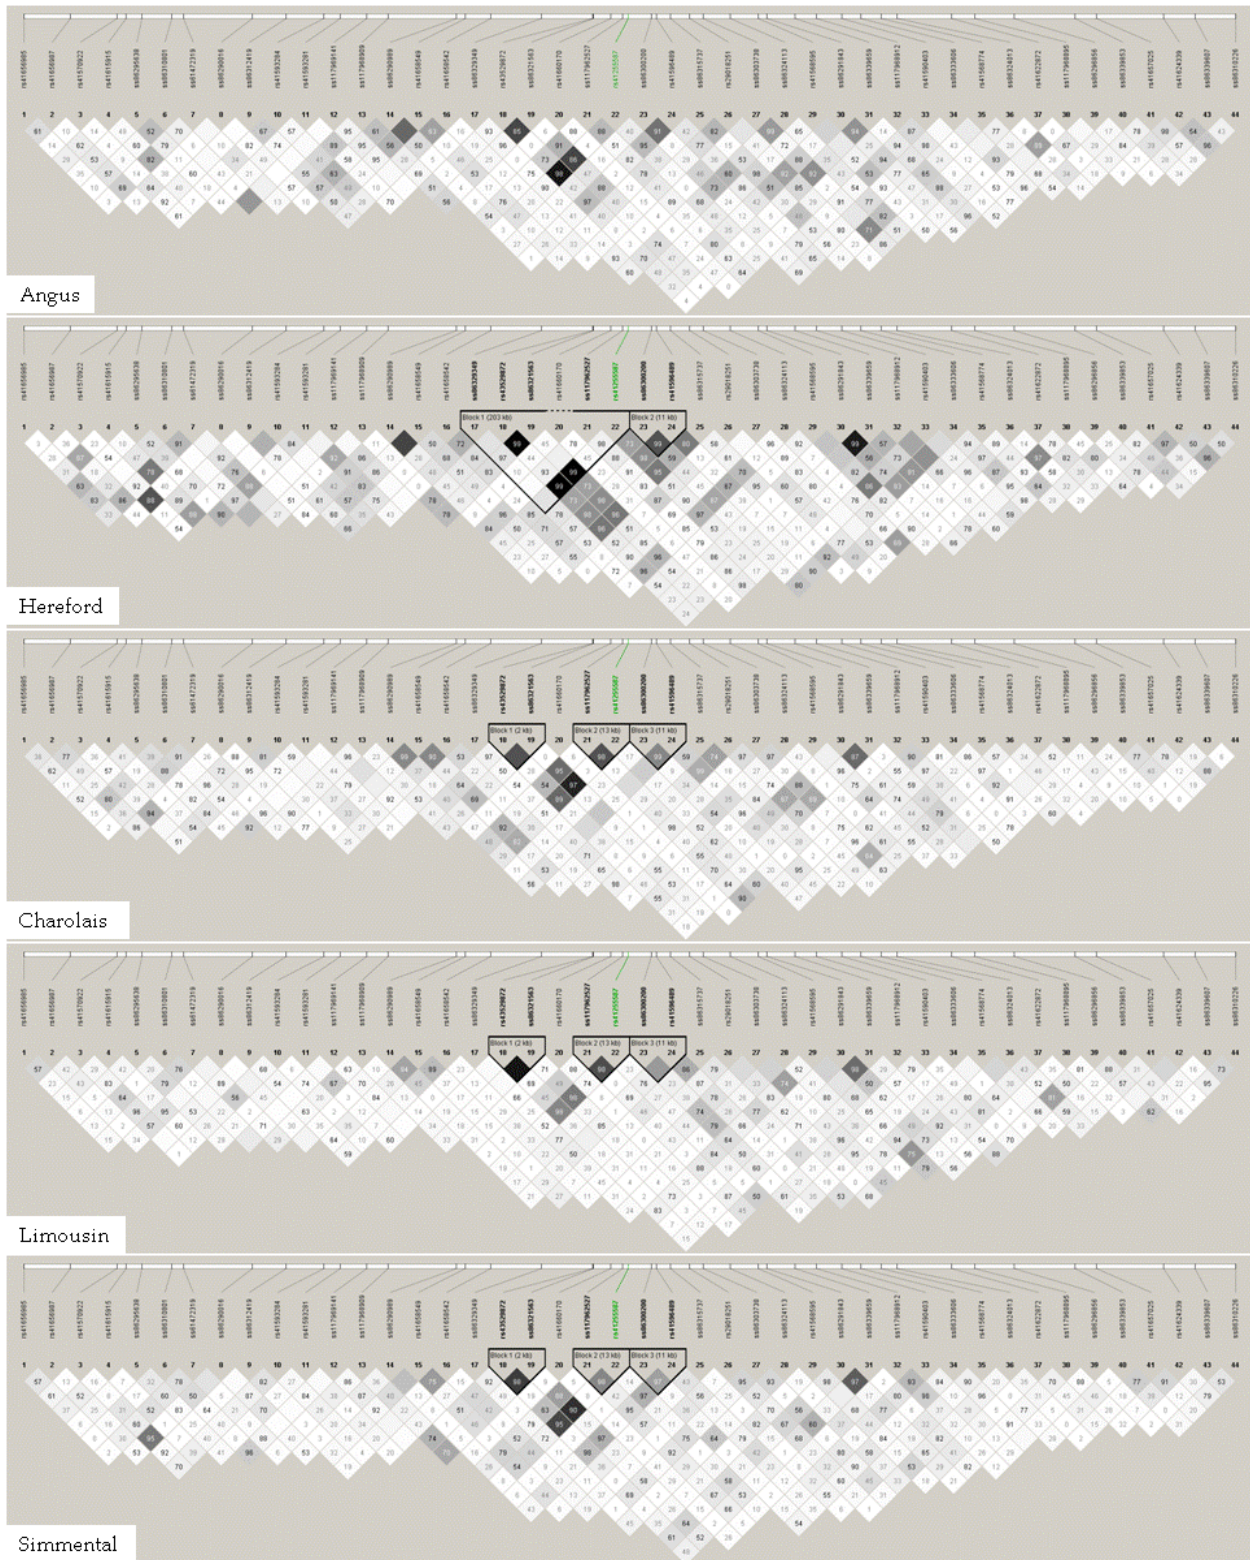

## References

Barrett J.C., Fry B., Maller J. & Daly M.J. (2005) Haploview: analysis and visualization of LD and haplotype maps. *Bioinformatics* **21**, 263-5.
