# Supplementary material for: Genome-wide association analysis for quantitative trait loci influencing Warner–Bratzler shear force in five taurine cattle breeds
Source: PubMed Central journal article supplement (PMC3506923; doi:10.1111/j.1365-2052.2012.02323.x), 2012-02-27
Supplement: age0043-0662-sd3.pdf [file age0043-0662-sd3.pdf]

**Figure S3** Linkage disequilibrium (LD) plots ( $r^2$ ) created in Haploview v4.1 (Barrett *et al.* 2005) for the 100 SNP spanning 3.12 Mb centered on *CAPN1* on BTA29. Darker shading indicates regions of higher LD. The commercially tested SNP, *rs17812000* (#51), *rs17871051* (#58), and *rs17872050* (#62) are highlighted in green.

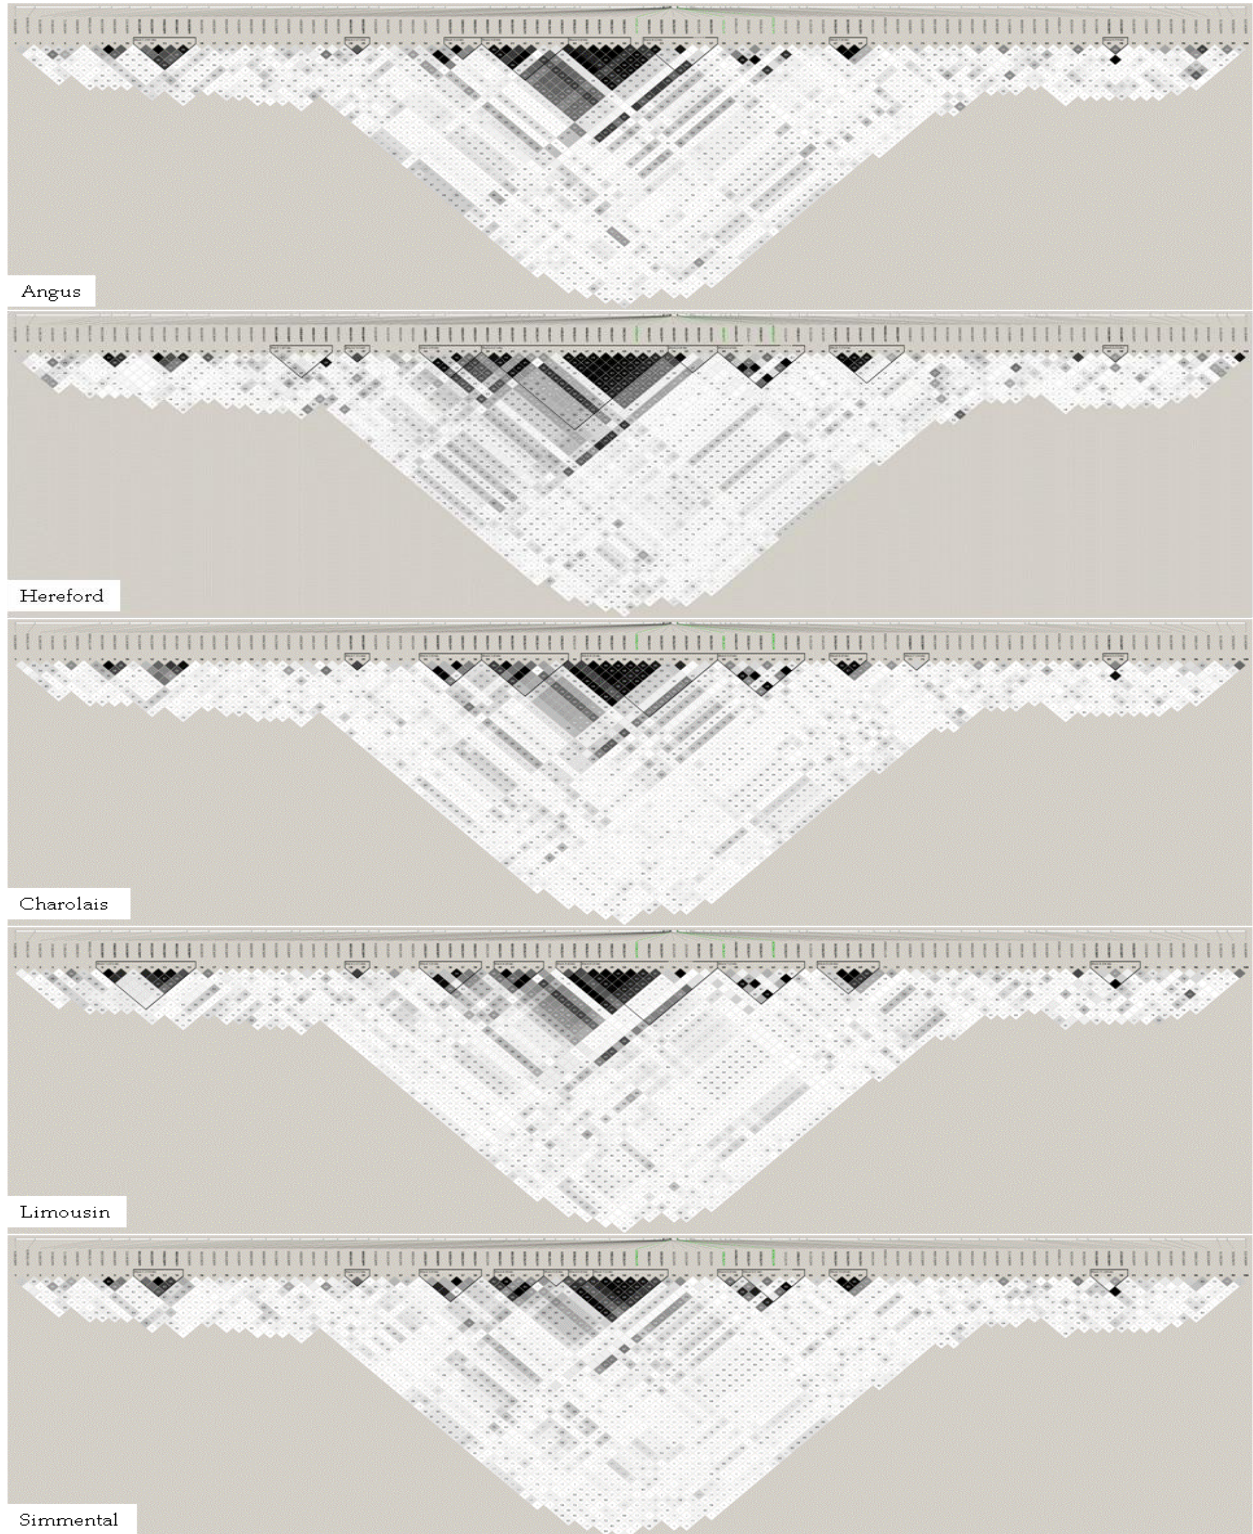

## References

Barrett J.C., Fry B., Maller J. & Daly M.J. (2005) Haploview: analysis and visualization of LD and haplotype maps. *Bioinformatics* **21**, 263-5.
