# Supplementary material for: Genome-wide association analysis for quantitative trait loci influencing Warner–Bratzler shear force in five taurine cattle breeds
Source: PubMed Central journal article supplement (PMC3506923; doi:10.1111/j.1365-2052.2012.02323.x), 2012-02-27
Supplement: age0043-0662-sd4.pdf [file age0043-0662-sd4.pdf]

**Table S1** Characteristics of SNPs located near *CAST* and *CAPN1* that were designed into the Illumina GoldenGate assay and genotyped in 3,240 CMP animals

| SNP ID <sup>1</sup> | BTA | POS <sup>2</sup> | Filtered <sup>3</sup> | Call Rate (%) |          |           |          |           | A Allele Frequency |          |           |          |           |
|---------------------|-----|------------------|-----------------------|---------------|----------|-----------|----------|-----------|--------------------|----------|-----------|----------|-----------|
|                     |     |                  |                       | Angus         | Hereford | Charolais | Limousin | Simmental | Angus              | Hereford | Charolais | Limousin | Simmental |
| <i>rs42269174</i>   | 7   | 98,260,103       | AF                    | 99.09         | 98.41    | 99.00     | 89.47    | 97.89     | 0.0000             | 0.0009   | 0.0000    | 0.0000   | 0.0000    |
| <i>rs42269169</i>   | 7   | 98,346,128       | AF                    | 99.09         | 97.82    | 99.00     | 89.12    | 97.50     | 1.0000             | 0.9991   | 1.0000    | 0.9980   | 0.9990    |
| <i>rs42269168</i>   | 7   | 98,351,749       | CR,AF                 | 93.48         | 92.03    | 96.58     | 88.42    | 95.20     | 0.9749             | 0.9699   | 0.9904    | 0.9782   | 0.9808    |
| <i>rs42269166</i>   | 7   | 98,381,155       | AF                    | 98.79         | 97.57    | 99.00     | 90.18    | 97.89     | 0.0000             | 0.0000   | 0.0000    | 0.0039   | 0.0000    |
| <i>rs42269167</i>   | 7   | 98,406,957       | AF                    | 98.64         | 96.90    | 99.15     | 91.23    | 98.46     | 0.0077             | 0.0074   | 0.0101    | 0.0058   | 0.0058    |
| <i>rs42269164</i>   | 7   | 98,414,333       | CR,AF                 | 98.94         | 96.81    | 97.72     | 88.42    | 96.93     | 0.9985             | 0.9931   | 0.9942    | 0.9940   | 0.9851    |
| <i>rs42269165</i>   | 7   | 98,423,052       | CR,AF                 | 98.94         | 97.57    | 98.72     | 88.77    | 97.70     | 0.0000             | 0.0000   | 0.0000    | 0.0000   | 0.0000    |
| <i>rs43529864</i>   | 7   | 98,446,203       | AF                    | 98.94         | 97.57    | 98.86     | 89.82    | 97.89     | 0.0000             | 0.0000   | 0.0000    | 0.0000   | 0.0000    |
| <i>rs43529865</i>   | 7   | 98,447,598       | AF                    | 98.64         | 97.06    | 99.00     | 89.12    | 97.31     | 1.0000             | 1.0000   | 1.0000    | 1.0000   | 1.0000    |
| <i>rs43529866</i>   | 7   | 98,450,896       | AF                    | 99.24         | 98.57    | 99.15     | 89.82    | 97.89     | 1.0000             | 0.9991   | 1.0000    | 1.0000   | 1.0000    |
| <i>rs43529867</i>   | 7   | 98,462,790       | AF                    | 99.09         | 98.07    | 98.86     | 90.18    | 98.27     | 0.0000             | 0.0000   | 0.0000    | 0.0000   | 0.0010    |
| <i>rs43529868</i>   | 7   | 98,465,338       | AF                    | 98.94         | 97.48    | 98.29     | 89.12    | 97.89     | 1.0000             | 0.9991   | 1.0000    | 1.0000   | 0.9980    |
| <i>rs41596484</i>   | 7   | 98,481,587       | AF                    | 99.09         | 97.90    | 98.86     | 89.82    | 97.50     | 0.0122             | 0.0043   | 0.0677    | 0.0137   | 0.0600    |
| <i>rs41596488</i>   | 7   | 98,482,088       | CR                    | 99.09         | 97.32    | 98.43     | 88.77    | 97.31     | 0.7768             | 0.4767   | 0.7359    | 0.8241   | 0.5592    |
| <i>rs43529869</i>   | 7   | 98,486,784       | AF                    | 98.18         | 97.06    | 98.72     | 90.18    | 97.12     | 0.0000             | 0.0000   | 0.0000    | 0.0000   | 0.0000    |
| <i>rs43529872</i>   | 7   | 98,495,888       |                       | 99.09         | 98.15    | 98.72     | 90.18    | 98.08     | 0.2064             | 0.5094   | 0.1912    | 0.1518   | 0.3630    |
| <i>rs43529870</i>   | 7   | 98,503,071       | CR,AF                 | 95.15         | 77.10    | 93.02     | 89.82    | 84.84     | 0.9968             | 0.9717   | 0.9931    | 0.9961   | 0.9706    |
| <i>rs41619071</i>   | 7   | 98,601,495       | DNC                   |               |          |           |          |           |                    |          |           |          |           |
| <i>rs43529862</i>   | 7   | 98,525,723       | AF                    | 99.24         | 98.24    | 98.58     | 89.82    | 97.70     | 0.9992             | 0.9983   | 0.9993    | 1.0000   | 0.9951    |
| <i>rs41660170</i>   | 7   | 98,538,952       |                       | 99.09         | 97.06    | 99.15     | 90.18    | 98.08     | 0.0749             | 0.0402   | 0.1121    | 0.0856   | 0.0646    |
| <i>rs42776088</i>   | 7   | 98,559,498       | AF                    | 99.09         | 95.72    | 98.86     | 89.82    | 97.50     | 1.0000             | 0.9982   | 1.0000    | 1.0000   | 0.9990    |
| <i>rs42776087</i>   | 7   | 98,574,830       | CR                    | 98.94         | 96.73    | 98.29     | 88.77    | 96.35     | 0.2213             | 0.5108   | 0.2471    | 0.2688   | 0.4373    |
| <i>rs41255587</i>   | 7   | 98,579,574       |                       | 98.64         | 96.31    | 98.01     | 89.47    | 96.55     | 0.2166             | 0.5109   | 0.2406    | 0.2725   | 0.4205    |
| <i>rs42776090</i>   | 7   | 98,620,447       | AF                    | 99.24         | 98.49    | 99.00     | 89.82    | 98.08     | 1.0000             | 0.9991   | 1.0000    | 0.9980   | 0.9980    |
| <i>rs41596489</i>   | 7   | 98,646,770       |                       | 99.24         | 98.15    | 98.72     | 89.12    | 97.70     | 0.4901             | 0.6970   | 0.6154    | 0.7756   | 0.6916    |
| <i>rs43529875</i>   | 7   | 98,680,392       | AF                    | 99.09         | 98.07    | 98.58     | 89.12    | 98.46     | 1.0000             | 0.9987   | 1.0000    | 1.0000   | 0.9951    |
| <i>rs43529877</i>   | 7   | 98,701,638       | AF                    | 99.24         | 98.57    | 99.15     | 89.82    | 98.27     | 0.0023             | 0.0060   | 0.0036    | 0.0059   | 0.0020    |
| <i>rs41657006</i>   | 7   | 98,709,304       | CR                    | 93.94         | 78.69    | 85.33     | 85.61    | 55.09     | 0.3750             | 0.2655   | 0.3038    | 0.2111   | 0.2648    |
| <i>rs43101783</i>   | 29  | 43,924,518       | AF                    | 98.79         | 97.65    | 97.72     | 89.47    | 96.93     | 0.9969             | 0.9987   | 0.9942    | 0.9902   | 0.9990    |
| <i>rs42191319</i>   | 29  | 44,000,728       |                       | 98.64         | 96.81    | 98.72     | 90.88    | 97.50     | 0.0630             | 0.2959   | 0.0938    | 0.0946   | 0.1358    |

|            |    |            |     |       |       |       |       |       |        |        |        |        |        |
|------------|----|------------|-----|-------|-------|-------|-------|-------|--------|--------|--------|--------|--------|
| rs42192038 | 29 | 44,029,526 |     | 98.33 | 97.99 | 98.58 | 89.47 | 97.31 | 0.4923 | 0.5801 | 0.3736 | 0.2137 | 0.3481 |
| rs42192064 | 29 | 44,042,363 |     | 99.09 | 98.15 | 99.00 | 89.47 | 98.27 | 0.6284 | 0.4526 | 0.4187 | 0.3902 | 0.4014 |
| rs42192074 | 29 | 44,047,246 | CR  | 98.18 | 96.73 | 97.44 | 88.77 | 95.59 | 0.6420 | 0.6019 | 0.6235 | 0.5929 | 0.6235 |
| rs42192077 | 29 | 44,049,244 |     | 98.64 | 97.48 | 98.29 | 89.12 | 97.50 | 0.3510 | 0.3972 | 0.3652 | 0.3878 | 0.3376 |
| rs42192079 | 29 | 44,051,567 |     | 98.33 | 96.56 | 98.15 | 89.82 | 97.31 | 0.6456 | 0.6012 | 0.6277 | 0.5938 | 0.6282 |
| rs42192083 | 29 | 44,053,733 |     | 99.24 | 97.57 | 97.72 | 90.18 | 96.93 | 0.3573 | 0.4015 | 0.3754 | 0.4027 | 0.3663 |
| rs42192084 | 29 | 44,054,901 |     | 98.94 | 96.90 | 98.15 | 89.12 | 95.20 | 0.7940 | 0.7290 | 0.7736 | 0.7539 | 0.8115 |
| rs41596485 | 29 | 44,054,902 | CR  | 9.09  | 5.03  | 8.55  | 12.98 | 4.99  | 0.5000 | 0.4917 | 0.5000 | 0.4865 | 0.5000 |
| rs42192090 | 29 | 44,058,688 |     | 98.79 | 98.15 | 99.00 | 89.47 | 98.08 | 0.4410 | 0.5679 | 0.4626 | 0.6412 | 0.4374 |
| rs42192096 | 29 | 44,060,410 |     | 99.24 | 97.82 | 98.86 | 90.18 | 98.08 | 0.5534 | 0.4125 | 0.4697 | 0.2899 | 0.5548 |
| rs42192100 | 29 | 44,062,694 |     | 98.79 | 97.23 | 98.01 | 89.82 | 96.74 | 0.5529 | 0.4142 | 0.4731 | 0.2910 | 0.5595 |
| rs17872077 | 29 | 44,063,844 | CR  | 87.12 | 84.90 | 91.03 | 79.30 | 85.99 | 0.1122 | 0.1260 | 0.0845 | 0.0664 | 0.0993 |
| rs41657009 | 29 | 44,063,937 | DNC |       |       |       |       |       | 0.0000 | 0.0000 | 0.0000 | 0.0000 | 0.0000 |
| rs17872078 | 29 | 44,063,938 |     | 98.94 | 96.98 | 98.72 | 90.18 | 97.70 | 0.4893 | 0.2171 | 0.3333 | 0.1868 | 0.3536 |
| rs17872101 | 29 | 44,066,634 | AF  | 99.09 | 98.49 | 99.00 | 90.18 | 98.46 | 0.0000 | 0.0000 | 0.0000 | 0.0000 | 0.0000 |
| rs17871028 | 29 | 44,067,079 | AF  | 99.24 | 96.98 | 98.86 | 89.82 | 97.31 | 0.0031 | 0.0078 | 0.0029 | 0.0000 | 0.0286 |
| rs17872081 | 29 | 44,067,161 | AF  | 98.48 | 97.90 | 98.43 | 89.82 | 97.89 | 0.0000 | 0.0004 | 0.0000 | 0.0000 | 0.0020 |
| rs17872093 | 29 | 44,067,234 |     | 99.24 | 97.48 | 97.72 | 89.82 | 97.31 | 0.4466 | 0.5856 | 0.5313 | 0.7090 | 0.4438 |
| rs17872094 | 29 | 44,067,596 | CR  | 62.27 | 56.71 | 73.36 | 49.47 | 69.10 | 0.3917 | 0.6198 | 0.5427 | 0.4681 | 0.6153 |
| rs17871984 | 29 | 44,067,796 |     | 99.24 | 97.65 | 98.58 | 90.18 | 98.46 | 0.1260 | 0.2302 | 0.2406 | 0.1498 | 0.3343 |
| rs17870633 | 29 | 44,067,919 | AF  | 98.94 | 98.07 | 98.86 | 90.18 | 97.31 | 0.0000 | 0.0004 | 0.0007 | 0.0000 | 0.0020 |
| rs17871987 | 29 | 44,067,984 | CR  | 99.24 | 97.73 | 98.72 | 88.77 | 97.50 | 0.4267 | 0.1833 | 0.2302 | 0.1403 | 0.2185 |
| rs17870631 | 29 | 44,068,143 |     | 99.24 | 97.99 | 98.72 | 90.53 | 98.08 | 0.5725 | 0.8134 | 0.7691 | 0.8566 | 0.7789 |
| rs17870630 | 29 | 44,068,247 | AF  | 99.24 | 98.24 | 98.58 | 90.18 | 97.89 | 1.0000 | 0.9996 | 1.0000 | 1.0000 | 1.0000 |
| rs17870628 | 29 | 44,068,346 |     | 98.94 | 97.48 | 98.01 | 89.47 | 97.89 | 0.5352 | 0.8081 | 0.7071 | 0.7902 | 0.7010 |
| rs17870626 | 29 | 44,068,445 |     | 99.09 | 97.82 | 98.72 | 90.18 | 96.55 | 0.5680 | 0.8135 | 0.7655 | 0.8521 | 0.7465 |
| rs17872010 | 29 | 44,068,519 |     | 98.94 | 97.23 | 97.72 | 90.18 | 97.31 | 0.5743 | 0.8162 | 0.7682 | 0.8560 | 0.7761 |
| rs17872004 | 29 | 44,068,580 |     | 98.33 | 97.40 | 98.29 | 90.18 | 95.97 | 0.5732 | 0.8178 | 0.7703 | 0.8541 | 0.7820 |
| rs17872003 | 29 | 44,068,812 |     | 97.58 | 96.39 | 98.15 | 89.82 | 96.93 | 0.4278 | 0.1819 | 0.2315 | 0.1445 | 0.2188 |
| rs17872000 | 29 | 44,069,063 |     | 98.18 | 95.72 | 99.43 | 99.30 | 99.23 |        |        |        |        |        |
| rs17872006 | 29 | 44,069,177 |     | 96.21 | 97.23 | 97.86 | 89.47 | 97.12 | 0.4299 | 0.1877 | 0.2394 | 0.1451 | 0.2322 |
| rs42192102 | 29 | 44,070,590 | CR  | 98.79 | 97.23 | 98.15 | 87.72 | 97.70 | 0.4371 | 0.5669 | 0.5203 | 0.6860 | 0.3978 |
| rs42192103 | 29 | 44,070,713 |     | 96.67 | 95.81 | 98.29 | 89.82 | 96.55 | 0.4326 | 0.1988 | 0.2355 | 0.1641 | 0.2674 |
| rs42192105 | 29 | 44,070,881 |     | 98.79 | 97.57 | 97.72 | 89.47 | 97.31 | 0.1304 | 0.1561 | 0.0707 | 0.0431 | 0.0966 |

|                                                                                                                                                                         |    |            |       |       |       |       |       |       |        |        |        |        |        |
|-------------------------------------------------------------------------------------------------------------------------------------------------------------------------|----|------------|-------|-------|-------|-------|-------|-------|--------|--------|--------|--------|--------|
| rs42192107                                                                                                                                                              | 29 | 44,071,034 |       | 98.94 | 97.48 | 98.72 | 90.53 | 97.70 | 0.1187 | 0.1506 | 0.0592 | 0.0426 | 0.0452 |
| rs42192108                                                                                                                                                              | 29 | 44,071,135 |       | 99.09 | 97.32 | 98.43 | 89.82 | 97.70 | 0.0344 | 0.1858 | 0.1606 | 0.0781 | 0.0472 |
| rs42192109                                                                                                                                                              | 29 | 44,071,593 |       | 98.79 | 96.90 | 98.58 | 89.47 | 97.31 | 0.4954 | 0.3935 | 0.3728 | 0.2667 | 0.4043 |
| rs42192110                                                                                                                                                              | 29 | 44,071,657 | CR    | 99.24 | 97.65 | 98.15 | 88.42 | 97.89 | 0.5595 | 0.4214 | 0.4768 | 0.3056 | 0.5500 |
| rs42192111                                                                                                                                                              | 29 | 44,071,828 | CR,AF | 74.24 | 63.17 | 60.97 | 44.91 | 63.34 | 1.0000 | 0.9967 | 1.0000 | 0.9844 | 0.9970 |
| rs42192117                                                                                                                                                              | 29 | 44,081,264 | AF    | 98.18 | 97.23 | 98.86 | 89.82 | 97.50 | 0.0000 | 0.0000 | 0.0000 | 0.0000 | 0.0010 |
| rs17870499                                                                                                                                                              | 29 | 44,085,195 | CR    | 98.64 | 97.40 | 98.58 | 88.07 | 97.70 | 0.0499 | 0.0263 | 0.0874 | 0.1096 | 0.0697 |
| rs17871051                                                                                                                                                              | 29 | 44,085,642 |       | 99.39 | 97.65 | 98.29 | 89.12 | 97.50 | 0.0998 | 0.1044 | 0.3659 | 0.3996 | 0.3051 |
| rs17871058                                                                                                                                                              | 29 | 44,085,769 | DNC*  |       |       |       |       |       |        |        |        |        |        |
| rs17871060                                                                                                                                                              | 29 | 44,086,042 | AF    | 99.24 | 98.07 | 98.29 | 89.82 | 96.55 | 1.0000 | 1.0000 | 1.0000 | 0.9961 | 1.0000 |
| rs17872027                                                                                                                                                              | 29 | 44,086,761 | AF    | 99.24 | 97.82 | 99.00 | 90.53 | 97.89 | 0.0061 | 0.1677 | 0.0259 | 0.0174 | 0.0216 |
| rs17872030                                                                                                                                                              | 29 | 44,086,943 | CR    | 98.64 | 97.40 | 98.29 | 88.42 | 96.35 | 0.0975 | 0.1047 | 0.3616 | 0.4028 | 0.3058 |
| rs17872031                                                                                                                                                              | 29 | 44,087,019 | AF    | 94.70 | 97.82 | 96.58 | 90.53 | 98.27 | 0.0160 | 0.0262 | 0.0133 | 0.0000 | 0.0078 |
| rs17872032                                                                                                                                                              | 29 | 44,087,205 |       | 98.33 | 97.32 | 98.15 | 90.18 | 96.93 | 0.0493 | 0.0250 | 0.0842 | 0.0953 | 0.0683 |
| rs17872033                                                                                                                                                              | 29 | 44,087,356 |       | 97.58 | 96.31 | 97.58 | 89.82 | 95.39 | 0.8960 | 0.8916 | 0.6263 | 0.5938 | 0.6620 |
| rs17872050                                                                                                                                                              | 29 | 44,087,629 |       | 99.55 | 96.64 | 99.29 | 99.65 | 99.04 |        |        |        |        |        |
| rs17872151                                                                                                                                                              | 29 | 44,087,858 |       | 99.09 | 97.90 | 98.15 | 90.18 | 97.70 | 0.0153 | 0.0167 | 0.0856 | 0.1323 | 0.0452 |
| rs17872153                                                                                                                                                              | 29 | 44,088,027 | CR    | 99.09 | 97.65 | 98.01 | 87.72 | 96.93 | 0.9893 | 0.9854 | 0.8990 | 0.8360 | 0.9010 |
| rs17870855                                                                                                                                                              | 29 | 44,088,451 | CR    | 98.79 | 97.15 | 98.43 | 88.77 | 96.93 | 0.0997 | 0.1036 | 0.3647 | 0.4071 | 0.3267 |
| rs17870847                                                                                                                                                              | 29 | 44,088,897 |       | 99.24 | 97.23 | 98.72 | 90.53 | 98.08 | 0.7038 | 0.8352 | 0.4531 | 0.3217 | 0.5284 |
| rs17870848                                                                                                                                                              | 29 | 44,089,043 | CR    | 88.94 | 91.78 | 91.31 | 81.05 | 91.55 | 0.6457 | 0.5457 | 0.6131 | 0.5714 | 0.5461 |
| rs42192119                                                                                                                                                              | 29 | 44,110,295 |       | 99.24 | 98.24 | 98.86 | 89.82 | 98.08 | 0.3267 | 0.4539 | 0.4150 | 0.4219 | 0.3591 |
| rs42192125                                                                                                                                                              | 29 | 44,112,272 | AF    | 99.09 | 97.73 | 99.15 | 90.88 | 98.46 | 0.0000 | 0.0000 | 0.0000 | 0.0019 | 0.0010 |
| rs42195143                                                                                                                                                              | 29 | 44,119,671 |       | 96.82 | 96.31 | 98.29 | 90.18 | 96.35 | 0.5939 | 0.6224 | 0.6203 | 0.5233 | 0.6365 |
| rs42194216                                                                                                                                                              | 29 | 44,122,272 |       | 99.09 | 98.07 | 98.86 | 89.82 | 97.70 | 0.0956 | 0.1737 | 0.0620 | 0.1543 | 0.1130 |
| rs42194178                                                                                                                                                              | 29 | 44,125,747 |       | 99.55 | 98.07 | 98.86 | 90.88 | 97.89 | 0.0951 | 0.1698 | 0.0641 | 0.1544 | 0.1118 |
| rs42194132                                                                                                                                                              | 29 | 44,130,887 |       | 99.09 | 97.15 | 99.15 | 89.12 | 97.70 | 0.9060 | 0.8286 | 0.9368 | 0.8465 | 0.8870 |
| rs42193349                                                                                                                                                              | 29 | 44,154,126 |       | 98.18 | 97.32 | 98.01 | 89.12 | 97.50 | 0.0332 | 0.1586 | 0.0334 | 0.1240 | 0.0827 |
| rs42193335                                                                                                                                                              | 29 | 44,163,955 | AF    | 99.09 | 97.99 | 98.72 | 89.82 | 97.31 | 1.0000 | 0.9991 | 1.0000 | 0.9961 | 1.0000 |
| rs41586223                                                                                                                                                              | 29 | 44,196,154 | DNC   |       |       |       |       |       |        |        |        |        |        |
| rs29003633                                                                                                                                                              | 29 | 44,208,978 |       | 98.94 | 97.99 | 99.00 | 90.18 | 97.89 | 0.0398 | 0.0424 | 0.0540 | 0.0136 | 0.0480 |
| rs42195220                                                                                                                                                              | 29 | 44,235,914 | AF    | 99.24 | 98.49 | 99.15 | 90.53 | 98.27 | 0.0000 | 0.0000 | 0.0000 | 0.0000 | 0.0000 |
| <sup>1</sup> Identities of commercialized SNPs predictive of tenderness are shaded in red. Identities of SNPs within <i>CAST</i> and <i>CAPN1</i> are shaded in yellow. |    |            |       |       |       |       |       |       |        |        |        |        |        |
| Bold SNPs have been removed from dbSNP.                                                                                                                                 |    |            |       |       |       |       |       |       |        |        |        |        |        |

|                                                                                                                                                      |  |  |  |  |  |  |  |  |
|------------------------------------------------------------------------------------------------------------------------------------------------------|--|--|--|--|--|--|--|--|
| <sup>2</sup> Base pair position from the UMD3.1 sequence assembly.                                                                                   |  |  |  |  |  |  |  |  |
| <sup>3</sup> Reason for filtering SNP from analysis. DNC=Did not convert, AF=Allele Frequency, CR=Call rate. * = Also included on BovineSNP50 assay. |  |  |  |  |  |  |  |  |
