# Supplementary material for: Genome-wide association analysis for quantitative trait loci influencing Warner–Bratzler shear force in five taurine cattle breeds
Source: PubMed Central journal article supplement (PMC3506923; doi:10.1111/j.1365-2052.2012.02323.x), 2012-02-27
Supplement: age0043-0662-sd6.pdf [file age0043-0662-sd6.pdf]

| Table S3. Patterns of SNP association with WBSF for CAST and CAPN1 loci. |                  |                     |            |       |          |           |          |           |
|--------------------------------------------------------------------------|------------------|---------------------|------------|-------|----------|-----------|----------|-----------|
| BTA                                                                      | POS <sup>1</sup> | SNP ID <sup>2</sup> | All Breeds | Angus | Hereford | Charolais | Limousin | Simmental |
| 7                                                                        | 97,151,592       | rs41656985          | 17853      | 22832 | 22123    | 11997     | 40460    | 19009     |
| 7                                                                        | 97,261,052       | rs41656987          | 654        | 5620  | 39476    | 13999     | 1891     | 2069      |
| 7                                                                        | 97,372,656       | rs41570922          | 20417      | 16753 | 26124    | 38433     | 14071    | 33362     |
| 7                                                                        | 97,393,157       | rs41615915          | 1427       | 37659 | 39656    | 1009      | 17193    | 6660      |
| 7                                                                        | 97,430,691       | ss86295638          | 3045       | 39136 | 27527    | 1047      | 23654    | 13621     |
| 7                                                                        | 97,501,859       | ss86310801          | 13413      | 33096 | 22602    | 19582     | 10997    | 16395     |
| 7                                                                        | 97,529,872       | ss61472319          | 10706      | 16140 | 20625    | 1743      | 6464     | 29536     |
| 7                                                                        | 97,691,853       | ss86290016          | 30824      | 31090 | 22986    | 36148     | 36108    | 24197     |
| 7                                                                        | 97,772,240       | ss86312419          | 10263      | 8991  | 28755    | 7170      | 16285    | 37994     |
| 7                                                                        | 97,861,341       | rs41593284          | 921        | 27589 | 4833     | 32544     | 37       | 17064     |
| 7                                                                        | 97,898,940       | rs41593281          | 50         | 10852 | 33       | 23180     | 32882    | 6820      |
| 7                                                                        | 97,961,659       | ss117969141         | 28454      | 25196 | 38529    | 39653     | 37599    | 25297     |
| 7                                                                        | 98,013,150       | ss117968909         | 35590      | 29216 | 1170     | 4574      | 26692    | 308       |
| 7                                                                        | 98,173,299       | ss86290989          | 30594      | 29793 | 9717     | 4845      | 29926    | 29007     |
| 7                                                                        | 98,194,828       | rs41658549          | 34336      | 6424  | 2534     | 90        | 30247    | 15824     |
| 7                                                                        | 98,254,815       | rs41658542          | 13991      | 24584 | 267      | 603       | 11619    | 21439     |
| 7                                                                        | 98,375,640       | ss86329349          | 1790       | 4605  | 1593     | 38596     | 23512    | 33940     |
| 7                                                                        | 98,495,888       | rs43529872          | 13         | 610   | 3        | 57        | 3069     | 20634     |
| 7                                                                        | 98,498,047       | ss86321563          | 12         | 294   | 2        | 66        | 6102     | 15068     |
| 7                                                                        | 98,538,952       | rs41660170          | 8319       | 6163  | 39936    | 10548     | 29756    | 20353     |
| 7                                                                        | 98,566,391       | ss117962527         | 1310       | 2288  | 27900    | 619       | 20424    | 39851     |
| 7                                                                        | 98,579,574       | rs41255587          | 10         | 237   | 1        | 14        | 2479     | 27896     |
| 7                                                                        | 98,635,208       | ss86300200          | 37         | 11749 | 7        | 11342     | 4871     | 8383      |
| 7                                                                        | 98,646,770       | rs41596489          | 34         | 628   | 11       | 38675     | 17319    | 30575     |
| 7                                                                        | 98,680,293       | ss86315737          | 250        | 465   | 34       | 18680     | 14562    | 39284     |
| 7                                                                        | 98,726,055       | rs29018251          | 13126      | 848   | 5956     | 5486      | 38597    | 28483     |
| 7                                                                        | 98,757,265       | ss86303738          | 17394      | 26602 | 27914    | 20844     | 34152    | 5174      |
| 7                                                                        | 98,820,742       | ss86324113          | 137        | 746   | 150      | 29169     | 22220    | 2224      |
| 7                                                                        | 98,887,313       | rs41568595          | 15241      | 35496 | 29107    | 8018      | 38017    | 32238     |
| 7                                                                        | 98,907,404       | ss86291843          | 9022       | 39450 | 9020     | 20771     | 4773     | 22927     |
| 7                                                                        | 98,974,456       | ss86339659          | 7758       | 16220 | 6313     | 25941     | 24786    | 34105     |
| 7                                                                        | 99,024,444       | ss117968912         | 24262      | 20693 | 6213     | 1798      | 15823    | 13240     |
| 7                                                                        | 99,085,299       | rs41590403          | 9428       | 20682 | 24941    | 9134      | 4854     | 30656     |
| 7                                                                        | 99,130,598       | ss86333606          | 1878       | 35186 | 26       | 34124     | 33105    | 11400     |
| 7                                                                        | 99,178,748       | rs41568774          | 33934      | 35119 | 17840    | 37290     | 16533    | 18785     |
| 7                                                                        | 99,215,474       | ss86324013          | 5728       | 38209 | 1565     | 37408     | 34561    | 25708     |
| 7                                                                        | 99,344,820       | rs41622872          | 1488       | 20805 | 292      | 22465     | 1993     | 7618      |
| 7                                                                        | 99,399,852       | ss117968895         | 37103      | 18064 | 39777    | 21174     | 35095    | 37490     |
| 7                                                                        | 99,492,904       | ss86296856          | 6124       | 5452  | 40099    | 5651      | 36078    | 36085     |
| 7                                                                        | 99,635,841       | ss86339853          | 32326      | 35802 | 7339     | 10001     | 11279    | 8481      |
| 7                                                                        | 99,687,614       | rs41657025          | 19734      | 6764  | 15594    | 21139     | 38911    | 6044      |
| 7                                                                        | 99,845,133       | rs41624339          | 1593       | 28933 | 13874    | 1849      | 16503    | 9618      |
| 7                                                                        | 99,919,908       | ss86339607          | 35826      | 32733 | 12431    | 40446     | 13228    | 18950     |
| 7                                                                        | 100,015,468      | ss86310226          | 27936      | 27227 | 9309     | 36010     | 12692    | 15892     |
| 29                                                                       | 42,406,544       | ss86319674          | 37050      | 4925  | 23582    | 28260     | 21027    | 18936     |
| 29                                                                       | 42,455,680       | ss117974470         | 22297      | 37162 | 29770    | 25573     | 5930     | 7326      |
| 29                                                                       | 42,620,218       | rs42189770          | 35226      | 28646 | 8272     | 20924     | 33490    | 30054     |
| 29                                                                       | 42,651,294       | rs43706142          | 28368      | 1526  | 13688    | 20292     | 33318    | 33867     |
| 29                                                                       | 42,696,595       | rs42189112          | 11135      | 4128  | 567      | 12339     | 38243    | 4930      |
| 29                                                                       | 42,749,808       | rs29020063          | 28224      | 13151 | 2449     | 29252     | 12285    | 1538      |
| 29                                                                       | 42,842,353       | ss117974486         | 8500       | 5777  | 7774     | 25144     | 6122     | 24        |
| 29                                                                       | 42,897,144       | ss86322358          | 27082      | 14890 | 31939    | 27607     | 33377    | 7184      |

|    |            |            |       |       |       |       |       |       |
|----|------------|------------|-------|-------|-------|-------|-------|-------|
| 29 | 43,006,000 | ss86339964 | 32865 | 10952 | 32290 | 27608 | 33378 | 10290 |
| 29 | 43,043,207 | ss86341572 | 20145 | 5329  | 32350 | 4763  | 12546 | 3676  |
| 29 | 43,108,445 | ss86337140 | 608   | 1800  | 3230  | 19455 | 27355 | 8204  |
| 29 | 43,129,250 | ss86337549 | 7614  | 933   | 38609 | 37467 | 9721  | 22158 |
| 29 | 43,189,370 | ss86319044 | 9896  | 929   | 38610 | 39410 | 15557 | 22159 |
| 29 | 43,224,753 | rs29013208 | 9469  | 1268  | 37486 | 27816 | 15836 | 8935  |
| 29 | 43,269,744 | ss86282762 | 16588 | 2397  | 36965 | 25543 | 21052 | 24438 |
| 29 | 43,304,256 | rs29024708 | 5161  | 1726  | 19477 | 22317 | 32243 | 344   |
| 29 | 43,328,607 | ss86295061 | 35423 | 2869  | 9694  | 11234 | 25778 | 26570 |
| 29 | 43,429,511 | ss86318094 | 42    | 66    | 37    | 20269 | 10690 | 7322  |
| 29 | 43,466,342 | ss86310741 | 7210  | 889   | 20819 | 12113 | 6737  | 11755 |
| 29 | 43,498,073 | ss86338800 | 1179  | 1059  | 26456 | 1057  | 12237 | 4447  |
| 29 | 43,611,640 | ss86298040 | 77    | 13108 | 2175  | 227   | 27133 | 175   |
| 29 | 43,652,252 | ss86327310 | 309   | 28    | 6692  | 33574 | 14789 | 1316  |
| 29 | 43,686,401 | ss86325323 | 30559 | 1290  | 10319 | 11271 | 38311 | 16973 |
| 29 | 43,709,769 | ss86290081 | 6403  | 191   | 4662  | 9805  | 15489 | 17693 |
| 29 | 43,747,765 | rs42190085 | 9036  | 19561 | 38491 | 8579  | 26434 | 27476 |
| 29 | 43,749,527 | ss86299346 | 25366 | 23606 | 37713 | 17640 | 33965 | 21036 |
| 29 | 43,777,249 | ss86299989 | 35438 | 2116  | 35762 | 18707 | 39614 | 29763 |
| 29 | 43,826,144 | rs42191289 | 31815 | 3320  | 9684  | 22649 | 7809  | 192   |
| 29 | 43,839,783 | ss86336460 | 5396  | 729   | 9980  | 6073  | 17672 | 49    |
| 29 | 43,914,923 | ss86335514 | 24    | 6410  | 3157  | 114   | 8553  | 102   |
| 29 | 44,000,728 | rs42191319 | 22471 | 40614 | 11851 | 25045 | 22311 | 31987 |
| 29 | 44,029,526 | rs42192038 | 1251  | 6182  | 24398 | 4384  | 19663 | 609   |
| 29 | 44,042,363 | rs42192064 | 21    | 182   | 3321  | 11547 | 31563 | 1     |
| 29 | 44,049,244 | rs42192077 | 8485  | 17117 | 1831  | 29917 | 40623 | 33046 |
| 29 | 44,050,471 | ss86284058 | 3336  | 26458 | 559   | 8623  | 33356 | 13451 |
| 29 | 44,051,567 | rs42192079 | 11270 | 22597 | 2795  | 29554 | 39615 | 31917 |
| 29 | 44,053,733 | rs42192083 | 12323 | 17992 | 2555  | 32354 | 36798 | 30606 |
| 29 | 44,054,901 | rs42192084 | 22522 | 24469 | 12212 | 13490 | 30189 | 18346 |
| 29 | 44,058,688 | rs42192090 | 6685  | 2065  | 17751 | 201   | 10644 | 9852  |
| 29 | 44,060,410 | rs42192096 | 7985  | 1898  | 10671 | 887   | 17953 | 3893  |
| 29 | 44,062,694 | rs42192100 | 8555  | 1844  | 10835 | 1333  | 20163 | 4552  |
| 29 | 44,063,938 | rs17872078 | 8     | 12    | 36    | 15    | 29894 | 25    |
| 29 | 44,067,234 | rs17872093 | 10292 | 1899  | 6796  | 888   | 20164 | 3580  |
| 29 | 44,067,796 | rs17871984 | 11    | 44    | 4     | 2066  | 19038 | 516   |
| 29 | 44,068,143 | rs17870631 | 2     | 4     | 24    | 7     | 39018 | 6     |
| 29 | 44,068,346 | rs17870628 | 14    | 16    | 19    | 750   | 22524 | 269   |
| 29 | 44,068,445 | rs17870626 | 6     | 7     | 29    | 12    | 31903 | 5     |
| 29 | 44,068,519 | rs17872010 | 7     | 6     | 40    | 8     | 39019 | 13    |
| 29 | 44,068,580 | rs17872004 | 4     | 5     | 27    | 11    | 36321 | 9     |
| 29 | 44,068,812 | rs17872003 | 5     | 3     | 28    | 6     | 35508 | 12    |
| 29 | 44,069,063 | rs17812000 | 3     | 1     | 59    | 9     | 39020 | 10    |
| 29 | 44,069,177 | rs17872006 | 9     | 2     | 46    | 40    | 24824 | 14    |
| 29 | 44,070,713 | rs42192103 | 1     | 8     | 9     | 1     | 25633 | 2     |
| 29 | 44,070,881 | rs42192105 | 394   | 6164  | 200   | 30967 | 37715 | 10226 |
| 29 | 44,071,034 | rs42192107 | 495   | 5948  | 183   | 22528 | 37716 | 21810 |
| 29 | 44,071,135 | rs42192108 | 10891 | 35181 | 23330 | 21578 | 9516  | 38169 |
| 29 | 44,071,593 | rs42192109 | 1089  | 193   | 26124 | 100   | 11867 | 2864  |
| 29 | 44,085,642 | rs17871051 | 22    | 22    | 8993  | 829   | 3823  | 128   |
| 29 | 44,085,769 | rs17871058 | 16    | 29    | 10865 | 5     | 82    | 44    |
| 29 | 44,087,205 | rs17872032 | 977   | 3035  | 36234 | 2335  | 14676 | 3236  |
| 29 | 44,087,356 | rs17872033 | 27    | 26    | 9090  | 1020  | 2073  | 337   |
| 29 | 44,087,629 | rs17872050 | 15    | 17    | 11193 | 3     | 30    | 54    |
| 29 | 44,087,858 | rs17872151 | 7794  | 38670 | 21318 | 12661 | 22722 | 19232 |

|    |            |             |       |       |       |       |       |       |
|----|------------|-------------|-------|-------|-------|-------|-------|-------|
| 29 | 44,088,897 | rs17870847  | 17    | 23    | 13127 | 2     | 39    | 91    |
| 29 | 44,110,295 | rs42192119  | 24761 | 30393 | 34998 | 11139 | 17791 | 29587 |
| 29 | 44,119,671 | rs42195143  | 27184 | 13786 | 2181  | 33844 | 29050 | 24476 |
| 29 | 44,122,272 | rs42194216  | 17667 | 28444 | 8083  | 27006 | 31593 | 40203 |
| 29 | 44,125,747 | rs42194178  | 16874 | 25410 | 6562  | 27074 | 31594 | 40204 |
| 29 | 44,130,887 | rs42194132  | 20944 | 25411 | 7613  | 26871 | 31592 | 31199 |
| 29 | 44,154,126 | rs42193349  | 13422 | 10208 | 5641  | 31876 | 28607 | 21748 |
| 29 | 44,172,614 | ss117965984 | 3742  | 39565 | 4851  | 10280 | 24312 | 5842  |
| 29 | 44,196,154 | ss86318958  | 29029 | 13994 | 8832  | 22414 | 34749 | 33087 |
| 29 | 44,208,978 | rs29003633  | 19817 | 1795  | 39702 | 33937 | 39148 | 28356 |
| 29 | 44,223,148 | ss86323783  | 1050  | 105   | 36704 | 940   | 9476  | 28615 |
| 29 | 44,243,444 | ss86313099  | 32174 | 543   | 399   | 4467  | 31547 | 19210 |
| 29 | 44,325,408 | ss86292140  | 41    | 11    | 14276 | 2309  | 15992 | 648   |
| 29 | 44,372,611 | ss86329852  | 15417 | 38369 | 20426 | 2699  | 9819  | 8295  |
| 29 | 44,395,075 | ss86333994  | 275   | 979   | 2714  | 33693 | 22902 | 210   |
| 29 | 44,416,282 | rs43709648  | 18    | 149   | 10    | 1683  | 32992 | 14042 |
| 29 | 44,546,564 | ss86288185  | 494   | 1548  | 1310  | 4321  | 35230 | 12565 |
| 29 | 44,585,782 | ss86341172  | 2967  | 2916  | 9784  | 1728  | 16607 | 18099 |
| 29 | 44,628,137 | rs41600300  | 35992 | 11176 | 30882 | 26481 | 13878 | 19086 |
| 29 | 44,649,908 | ss86337530  | 36291 | 30728 | 2567  | 18016 | 29243 | 4361  |
| 29 | 44,740,917 | ss86334185  | 2424  | 652   | 2681  | 15788 | 26662 | 24049 |
| 29 | 44,807,928 | ss117965824 | 20185 | 804   | 1305  | 37934 | 36739 | 26103 |
| 29 | 44,853,970 | rs42192429  | 36290 | 112   | 19416 | 4118  | 21464 | 2705  |
| 29 | 44,900,940 | rs43706228  | 1504  | 9     | 26793 | 43    | 35156 | 24021 |
| 29 | 44,969,518 | ss86337154  | 21170 | 31013 | 35635 | 16801 | 23994 | 26608 |
| 29 | 44,979,377 | ss86338214  | 24112 | 9928  | 13777 | 19335 | 30736 | 9711  |
| 29 | 44,999,264 | ss86310727  | 143   | 1078  | 32294 | 2467  | 2164  | 425   |
| 29 | 45,023,665 | ss86338763  | 25485 | 31014 | 30793 | 17900 | 23995 | 28945 |
| 29 | 45,102,557 | ss86332221  | 170   | 2240  | 31730 | 75    | 31673 | 264   |
| 29 | 45,129,099 | ss86335405  | 4960  | 2025  | 26978 | 5490  | 33645 | 24448 |
| 29 | 45,187,114 | ss86295760  | 9892  | 468   | 16200 | 33586 | 24838 | 32136 |
| 29 | 45,287,502 | ss86312485  | 7710  | 6287  | 36387 | 1294  | 30142 | 35470 |
| 29 | 45,326,585 | rs42198683  | 23963 | 15047 | 6206  | 174   | 30801 | 14249 |
| 29 | 45,367,095 | ss86322638  | 13328 | 12392 | 3940  | 22784 | 19051 | 6856  |
| 29 | 45,458,280 | rs43706176  | 24499 | 6324  | 34840 | 34884 | 24588 | 40236 |
| 29 | 45,482,143 | rs29025626  | 1893  | 136   | 35054 | 17005 | 2280  | 16790 |
| 29 | 45,530,264 | ss86341375  | 34109 | 39453 | 35889 | 20334 | 18804 | 24973 |

<sup>1</sup>UMD3.1 Coordinates. SNPs located within *CAST* and *CAPN1* are shaded in yellow.

<sup>2</sup>Commercialized SNPs are shaded in red.

<sup>3</sup>GBLUP allele substitution effect ( $\alpha$ ) ranks. Values less than 500 are shaded in yellow for the across-breed

<sup>4</sup>GBLUP of SNP allele substitution effects ( $\alpha$ ) estimated as a random effect.

<sup>5</sup>SNP allele substitution effects ( $\beta$ ) estimated as fixed effects in a mixed linear model including the genome

<sup>6</sup> $-\log_{10}(P)$ -value for the test of the null hypothesis of an allele substitution effect ( $\beta$ ) of zero. Maximum value

<sup>7</sup> $-\log_{10}(P)$ -value for the test of the null hypothesis of all haplotype substitution effects ( $\Pi$ ) being zero. Maximum value

<sup>8</sup>Number of haplotypes and effective number of haplotypes in parentheses for the 13 (*CAST*) or 31 (*CAPN1*)

<sup>9</sup>Number Percentage of phenotypic variation in WBSF explained by haplotypes centered on the identified

|     |                  |                     |                      |                 |                    |                     | ASE <sup>4</sup>   |                     |
|-----|------------------|---------------------|----------------------|-----------------|--------------------|---------------------|--------------------|---------------------|
| BTA | POS <sup>1</sup> | SNP ID <sup>2</sup> | $\alpha$ -All Breeds | $\alpha$ -Angus | $\alpha$ -Hereford | $\alpha$ -Charolais | $\alpha$ -Limousin | $\alpha$ -Simmental |
| 7   | 97,151,592       | rs41656985          | 0.00030671           | -0.00017099     | 0.00020134         | 0.00017805          | -0.00000025        | 0.00003928          |
| 7   | 97,261,052       | rs41656987          | 0.00104868           | 0.00048033      | 0.00017963         | -0.00001059         | 0.00011002         | 0.00011454          |
| 7   | 97,372,656       | rs41570922          | -0.00026557          | -0.00024736     | 0.00001186         | -0.00013418         | -0.00004761        | 0.00001181          |
| 7   | 97,393,157       | rs41615915          | -0.00090198          | 0.00002637      | -0.00048107        | 0.00000907          | -0.00003997        | -0.00007934         |
| 7   | 97,430,691       | ss86295638          | 0.00074568           | -0.00001324     | 0.00047692         | -0.00012040         | -0.00002678        | 0.00005340          |
| 7   | 97,501,859       | ss86310801          | -0.00039152          | -0.00006694     | -0.00012889        | -0.00017279         | 0.00005665         | -0.00004583         |
| 7   | 97,529,872       | ss61472319          | 0.00045326           | -0.00025686     | 0.00042590         | -0.00019590         | 0.00007461         | -0.00001851         |
| 7   | 97,691,853       | ss86290016          | 0.00012060           | 0.00008623      | 0.00002409         | 0.00016817          | 0.00000658         | -0.00002851         |
| 7   | 97,772,240       | ss86312419          | -0.00046509          | -0.00038513     | -0.00026961        | -0.00010804         | 0.00004202         | 0.00000432          |
| 7   | 97,861,341       | rs41593284          | 0.00097782           | 0.00011997      | 0.00031705         | -0.00007204         | 0.00019796         | 0.00004403          |
| 7   | 97,898,940       | rs41593281          | 0.00155220           | 0.00034795      | 0.00080756         | 0.00016613          | 0.00001148         | 0.00007858          |
| 7   | 97,961,659       | ss117969141         | 0.00015075           | 0.00014493      | 0.00001131         | 0.00000912          | 0.00000444         | 0.00002638          |
| 7   | 98,013,150       | ss117968909         | 0.00006102           | -0.00010369     | -0.00046716        | 0.00050154          | 0.00002137         | 0.00016343          |
| 7   | 98,173,299       | ss86290989          | 0.00012363           | 0.00009822      | -0.00022941        | 0.00049209          | 0.00001609         | 0.00001944          |
| 7   | 98,194,828       | rs41658549          | -0.00007628          | -0.00045406     | 0.00038728         | -0.00109154         | 0.00001558         | 0.00004740          |
| 7   | 98,254,815       | rs41658542          | 0.00037965           | -0.00015143     | 0.00060092         | -0.00081707         | -0.00005474        | 0.00003396          |
| 7   | 98,375,640       | ss86329349          | 0.00085501           | 0.00051810      | 0.00043447         | 0.00001862          | 0.00002704         | -0.00001097         |
| 7   | 98,495,888       | rs43529872          | 0.00250806           | 0.00083827      | 0.00110064         | 0.00117126          | 0.00009663         | -0.00003567         |
| 7   | 98,498,047       | ss86321563          | 0.00251152           | 0.00094639      | 0.00113500         | 0.00114492          | 0.00007645         | -0.00004943         |
| 7   | 98,538,952       | rs41660170          | 0.00051614           | 0.00046201      | -0.00000394        | 0.00034683          | 0.00001636         | 0.00003628          |
| 7   | 98,566,391       | ss117962527         | -0.00091729          | -0.00063906     | -0.00007139        | -0.00081305         | -0.00003279        | 0.00000133          |
| 7   | 98,579,574       | rs41255587          | 0.00282846           | 0.00097459      | 0.00114941         | 0.00135049          | 0.00010269         | -0.00002145         |
| 7   | 98,635,208       | ss86300200          | -0.00163961          | -0.00033048     | -0.00094817        | 0.00033141          | -0.00008345        | -0.00007121         |
| 7   | 98,646,770       | rs41596489          | 0.00165452           | 0.00083405      | 0.00091620         | 0.00001794          | 0.00003965         | 0.00001667          |
| 7   | 98,680,293       | ss86315737          | -0.00122381          | -0.00087793     | -0.00080722        | 0.00022035          | 0.00004635         | -0.00000223         |
| 7   | 98,726,055       | rs29018251          | 0.00039725           | -0.00079091     | 0.00029255         | 0.00047142          | 0.00000296         | 0.00002039          |
| 7   | 98,757,265       | ss86303738          | 0.00031484           | -0.00013005     | 0.00007134         | 0.00019325          | -0.00000945        | 0.00008748          |
| 7   | 98,820,742       | ss86324113          | 0.00133604           | 0.00080850      | 0.00064476         | -0.00010404         | -0.00002931        | 0.00011256          |
| 7   | 98,887,313       | rs41568595          | -0.00035467          | 0.00004527      | -0.00006420        | -0.00040082         | 0.00000383         | -0.00001382         |
| 7   | 98,907,404       | ss86291843          | -0.00049765          | -0.00001049     | -0.00023992        | -0.00019419         | -0.00008403        | 0.00003096          |
| 7   | 98,974,456       | ss86339659          | 0.00053311           | 0.00025554      | 0.00028576         | 0.00013611          | 0.00002468         | 0.00001069          |
| 7   | 99,024,444       | ss117968912         | -0.00020917          | -0.00019566     | 0.00028752         | -0.00066185         | 0.00004319         | -0.00005451         |
| 7   | 99,085,299       | rs41590403          | -0.00048724          | -0.00019597     | 0.00009020         | -0.00037474         | -0.00008357        | -0.00001654         |
| 7   | 99,130,598       | ss86333606          | -0.00084381          | 0.00004792      | -0.00082834        | 0.00005799          | 0.00001115         | 0.00006039          |
| 7   | 99,178,748       | rs41568774          | -0.00008141          | -0.00004854     | 0.00014285         | -0.00003014         | -0.00004148        | -0.00003983         |
| 7   | 99,215,474       | ss86324013          | 0.00060578           | 0.00002168      | 0.00043622         | -0.00002909         | 0.00000885         | -0.00002556         |
| 7   | 99,344,820       | rs41622872          | -0.00089371          | 0.00019432      | -0.00059364        | 0.00017413          | -0.00010856        | -0.00007464         |
| 7   | 99,399,852       | ss117968895         | 0.00004348           | -0.00022947     | 0.00011675         | -0.00000801         | -0.00000804        | -0.00000512         |
| 7   | 99,492,904       | ss86296856          | -0.00059036          | -0.00048595     | -0.00029855        | -0.00000510         | -0.00000663        | 0.00000746          |
| 7   | 99,635,841       | ss86339853          | 0.00010124           | 0.00004271      | 0.00022532         | -0.00041791         | 0.00005579         | -0.00007081         |
| 7   | 99,687,614       | rs41657025          | 0.00027601           | -0.00044383     | 0.00011698         | 0.00026276          | -0.00000252        | 0.00008263          |
| 7   | 99,845,133       | rs41624339          | 0.00087822           | 0.00010669      | 0.00041919         | 0.00028876          | -0.00004153        | 0.00006660          |
| 7   | 99,919,908       | ss86339607          | 0.00005831           | -0.00007035     | -0.00000100        | 0.00031240          | 0.00004996         | -0.00003941         |
| 7   | 100,015,468      | ss86310226          | -0.00015773          | 0.00012360      | -0.00002482        | -0.00037122         | 0.00005151         | -0.00004723         |
| 29  | 42,406,544       | ss86319674          | 0.00004412           | 0.00050562      | -0.00006947        | -0.00016157         | 0.00003160         | -0.00003943         |
| 29  | 42,455,680       | ss117974470         | -0.00023668          | -0.00003069     | 0.00008615         | 0.00009795          | -0.00007734        | -0.00007606         |
| 29  | 42,620,218       | rs42189770          | 0.00006534           | 0.00010962      | -0.00011858        | 0.00039419          | -0.00001053        | -0.00001761         |
| 29  | 42,651,294       | rs43706142          | -0.00015187          | -0.00070089     | 0.00012322         | -0.00029180         | 0.00001081         | 0.00001108          |
| 29  | 42,696,595       | rs42189112          | 0.00044366           | 0.00053810      | -0.00019729        | 0.00082689          | -0.00000348        | 0.00008903          |
| 29  | 42,749,808       | rs29020063          | -0.00015364          | 0.00030458      | 0.00006338         | -0.00061076         | 0.00005270         | -0.00012279         |
| 29  | 42,842,353       | ss117974486         | -0.00051136          | -0.00047485     | 0.00025958         | 0.00014454          | -0.00007630        | -0.00023417         |
| 29  | 42,897,144       | ss86322358          | 0.00016974           | -0.00027606     | 0.00004743         | 0.00011962          | -0.00001069        | 0.00007674          |

|    |            |            |             |             |             |             |             |             |
|----|------------|------------|-------------|-------------|-------------|-------------|-------------|-------------|
| 29 | 43,006,000 | ss86339964 | 0.00009489  | -0.00034623 | 0.00004546  | 0.00011962  | -0.00001069 | 0.00006409  |
| 29 | 43,043,207 | ss86341572 | 0.00026966  | -0.00049034 | 0.00004519  | 0.00049483  | -0.00005195 | 0.00009832  |
| 29 | 43,108,445 | ss86337140 | -0.00106080 | -0.00067556 | -0.00036196 | -0.00021056 | -0.00002031 | -0.00007203 |
| 29 | 43,129,250 | ss86337549 | -0.00053788 | -0.00077763 | -0.00001082 | -0.00002855 | -0.00006132 | -0.00003243 |
| 29 | 43,189,370 | ss86319044 | -0.00047528 | -0.00077860 | -0.00001082 | -0.00001117 | -0.00004383 | -0.00003243 |
| 29 | 43,224,753 | rs29013208 | 0.00048618  | 0.00073297  | -0.00001707 | -0.00011758 | 0.00004316  | 0.00006908  |
| 29 | 43,269,744 | ss86282762 | 0.00032969  | 0.00063292  | -0.00001988 | -0.00014031 | 0.00003155  | 0.00002805  |
| 29 | 43,304,256 | rs29024708 | -0.00062896 | -0.00068295 | 0.00012981  | -0.00017576 | -0.00001246 | -0.00016043 |
| 29 | 43,328,607 | ss86295061 | 0.00006312  | 0.00060219  | -0.00022979 | 0.00033339  | 0.00002294  | -0.00002393 |
| 29 | 43,429,511 | ss86318094 | -0.00160847 | -0.00115096 | -0.00079603 | 0.00019993  | -0.00005774 | -0.00007607 |
| 29 | 43,466,342 | ss86310741 | -0.00055100 | -0.00078488 | -0.00011944 | -0.00031762 | 0.00007341  | -0.00005915 |
| 29 | 43,498,073 | ss86338800 | 0.00093454  | 0.00075831  | 0.00008009  | 0.00073932  | -0.00005284 | 0.00009236  |
| 29 | 43,611,640 | ss86298040 | 0.00146282  | 0.00030516  | 0.00040305  | 0.00095462  | -0.00002067 | 0.00017820  |
| 29 | 43,652,252 | ss86327310 | -0.00118582 | -0.00130334 | -0.00027823 | -0.00006298 | -0.00004581 | -0.00012680 |
| 29 | 43,686,401 | ss86325323 | -0.00012415 | -0.00073056 | -0.00022126 | 0.00033263  | 0.00000339  | 0.00004428  |
| 29 | 43,709,769 | ss86290081 | -0.00057947 | -0.00100397 | -0.00032111 | 0.00036105  | 0.00004399  | -0.00004252 |
| 29 | 43,747,765 | rs42190085 | -0.00049735 | -0.00020965 | 0.00001155  | -0.00038731 | -0.00002178 | -0.00002225 |
| 29 | 43,749,527 | ss86299346 | -0.00019238 | 0.00016220  | 0.00001596  | -0.00023397 | -0.00000979 | -0.00003480 |
| 29 | 43,777,249 | ss86299989 | -0.00006297 | -0.00065114 | -0.00002619 | 0.00022008  | 0.00000151  | -0.00001811 |
| 29 | 43,826,144 | rs42191289 | 0.00010758  | 0.00057745  | -0.00022997 | -0.00017228 | -0.00006867 | 0.00017586  |
| 29 | 43,839,783 | ss86336460 | 0.00061942  | 0.00081131  | -0.00022565 | 0.00045409  | -0.00003884 | 0.00020882  |
| 29 | 43,914,923 | ss86335514 | 0.00178742  | 0.00045442  | 0.00036472  | 0.00105531  | 0.00006568  | 0.00019156  |
| 29 | 44,000,728 | rs42191319 | -0.00023431 | 0.00000024  | -0.00020306 | 0.00014559  | -0.00002916 | 0.00001428  |
| 29 | 44,029,526 | rs42192038 | -0.00092400 | -0.00046153 | -0.00009380 | -0.00050894 | -0.00003445 | -0.00014690 |
| 29 | 44,042,363 | rs42192064 | -0.00185121 | -0.00101148 | -0.00035929 | -0.00032758 | 0.00001350  | -0.00033390 |
| 29 | 44,049,244 | rs42192077 | 0.00051167  | -0.00024213 | 0.00042010  | 0.00009658  | -0.00000003 | -0.00001236 |
| 29 | 44,050,471 | ss86284058 | -0.00072640 | 0.00013171  | -0.00053768 | -0.00038629 | -0.00001074 | 0.00005388  |
| 29 | 44,051,567 | rs42192079 | -0.00044039 | 0.00017368  | -0.00037741 | -0.00009999 | -0.00000151 | 0.00001440  |
| 29 | 44,053,733 | rs42192083 | 0.00041510  | -0.00023030 | 0.00038673  | 0.00007379  | 0.00000561  | -0.00001662 |
| 29 | 44,054,901 | rs42192084 | 0.00023354  | -0.00015260 | 0.00019889  | 0.00029494  | 0.00001567  | -0.00004086 |
| 29 | 44,058,688 | rs42192090 | 0.00056930  | 0.00065475  | -0.00014365 | 0.00097619  | -0.00005793 | 0.00006581  |
| 29 | 44,060,410 | rs42192096 | -0.00052571 | -0.00066766 | 0.00021685  | -0.00076421 | 0.00003819  | -0.00009649 |
| 29 | 44,062,694 | rs42192100 | -0.00050977 | -0.00067190 | 0.00021482  | -0.00070708 | 0.00003338  | -0.00009162 |
| 29 | 44,063,938 | rs17872078 | -0.00295459 | -0.00157336 | -0.00080065 | -0.00130368 | -0.00001613 | -0.00023251 |
| 29 | 44,067,234 | rs17872093 | 0.00046438  | 0.00066766  | -0.00027634 | 0.00076421  | -0.00003338 | 0.00009915  |
| 29 | 44,067,796 | rs17871984 | 0.00259095  | 0.00120226  | 0.00104514  | 0.00063915  | 0.00003574  | 0.00015159  |
| 29 | 44,068,143 | rs17870631 | 0.00317238  | 0.00186992  | 0.00083717  | 0.00140771  | 0.00000236  | 0.00025628  |
| 29 | 44,068,346 | rs17870628 | 0.00242209  | 0.00143725  | 0.00086741  | 0.00078922  | -0.00002876 | 0.00016684  |
| 29 | 44,068,445 | rs17870626 | 0.00308636  | 0.00178329  | 0.00081694  | 0.00138681  | -0.00001299 | 0.00025696  |
| 29 | 44,068,519 | rs17872010 | 0.00304194  | 0.00181486  | 0.00079066  | 0.00140771  | 0.00000236  | 0.00024530  |
| 29 | 44,068,580 | rs17872004 | 0.00313874  | 0.00186992  | 0.00082829  | 0.00139445  | 0.00000629  | 0.00024985  |
| 29 | 44,068,812 | rs17872003 | -0.00312101 | -0.00188257 | -0.00082610 | -0.00143916 | 0.00000748  | -0.00024616 |
| 29 | 44,069,063 | rs17812000 | -0.00316072 | -0.00228185 | -0.00073880 | -0.00140771 | -0.00000236 | -0.00024894 |
| 29 | 44,069,177 | rs17872006 | -0.00290630 | -0.00194198 | -0.00076244 | -0.00120636 | 0.00002461  | -0.00024429 |
| 29 | 44,070,713 | rs42192103 | -0.00332608 | -0.00173409 | -0.00094128 | -0.00152269 | 0.00002317  | -0.00028201 |
| 29 | 44,070,881 | rs42192105 | -0.00114491 | -0.00046199 | -0.00062239 | -0.00008699 | 0.00000425  | -0.00006435 |
| 29 | 44,071,034 | rs42192107 | -0.00110210 | -0.00046869 | -0.00062781 | -0.00017354 | 0.00000425  | -0.00003314 |
| 29 | 44,071,135 | rs42192108 | -0.00044909 | -0.00004798 | -0.00010125 | -0.00018521 | -0.00006208 | -0.00000408 |
| 29 | 44,071,593 | rs42192109 | -0.00094890 | -0.00100318 | 0.00008230  | -0.00107584 | 0.00005396  | -0.00010545 |
| 29 | 44,085,642 | rs17871051 | 0.00181650  | 0.00134971  | 0.00024034  | 0.00077510  | 0.00009067  | 0.00018604  |
| 29 | 44,085,769 | rs17871058 | 0.00236870  | 0.00130304  | 0.00021437  | 0.00146508  | 0.00018454  | 0.00021263  |
| 29 | 44,087,205 | rs17872032 | 0.00096858  | 0.00059348  | 0.00002368  | 0.00061874  | 0.00004608  | 0.00010203  |
| 29 | 44,087,356 | rs17872033 | -0.00172481 | -0.00132279 | -0.00023887 | -0.00074441 | -0.00010755 | -0.00016116 |
| 29 | 44,087,629 | rs17872050 | 0.00241788  | 0.00143400  | 0.00021062  | 0.00148598  | 0.00019989  | 0.00020641  |
| 29 | 44,087,858 | rs17872151 | 0.00053210  | -0.00001758 | 0.00011545  | 0.00030835  | 0.00002839  | 0.00003877  |

|    |            |             |             |             |             |             |             |             |
|----|------------|-------------|-------------|-------------|-------------|-------------|-------------|-------------|
| 29 | 44,088,897 | rs17870847  | -0.00236640 | -0.00134853 | -0.00018849 | -0.00152169 | -0.00019782 | -0.00019442 |
| 29 | 44,110,295 | rs42192119  | -0.00020159 | 0.00009268  | -0.00003017 | -0.00033493 | -0.00003855 | 0.00001843  |
| 29 | 44,119,671 | rs42195143  | 0.00016832  | -0.00029353 | 0.00040275  | -0.00006054 | 0.00001746  | -0.00002797 |
| 29 | 44,122,272 | rs42194216  | -0.00031009 | 0.00011168  | -0.00025424 | -0.00012528 | 0.00001347  | -0.00000075 |
| 29 | 44,125,747 | rs42194178  | -0.00032379 | 0.00014293  | -0.00028060 | -0.00012467 | 0.00001347  | -0.00000075 |
| 29 | 44,130,887 | rs42194132  | 0.00025708  | -0.00014293 | 0.00026202  | 0.00012655  | -0.00001347 | -0.00001560 |
| 29 | 44,154,126 | rs42193349  | -0.00039133 | 0.00036022  | -0.00029871 | -0.00007837 | 0.00001820  | -0.00003331 |
| 29 | 44,172,614 | ss117965984 | -0.00069936 | 0.00000948  | -0.00031668 | -0.00035165 | 0.00002555  | -0.00008372 |
| 29 | 44,196,154 | ss86318958  | 0.00014359  | 0.00029049  | 0.00024258  | -0.00017471 | 0.00000858  | -0.00001230 |
| 29 | 44,208,978 | rs29003633  | 0.00027473  | 0.00067584  | 0.00000504  | 0.00005976  | -0.00000215 | -0.00002063 |
| 29 | 44,223,148 | ss86323783  | 0.00095480  | 0.00108636  | 0.00002128  | 0.00075592  | 0.00006222  | 0.00002016  |
| 29 | 44,243,444 | ss86313099  | -0.00010319 | 0.00085706  | -0.00056913 | 0.00050513  | 0.00001353  | -0.00003883 |
| 29 | 44,325,408 | ss86292140  | -0.00161978 | -0.00161585 | -0.00017661 | -0.00061998 | -0.00004278 | -0.00014539 |
| 29 | 44,372,611 | ss86329852  | -0.00035147 | 0.00002025  | -0.00012224 | -0.00059268 | -0.00006096 | 0.00007161  |
| 29 | 44,395,075 | ss86333994  | -0.00120791 | -0.00077009 | -0.00038065 | 0.00006199  | -0.00002805 | -0.00017409 |
| 29 | 44,416,282 | rs43709648  | -0.00203603 | -0.00103453 | -0.00093446 | -0.00067339 | -0.00001133 | -0.00005219 |
| 29 | 44,546,564 | ss86288185  | 0.00110217  | 0.00069894  | 0.00045516  | 0.00051185  | -0.00000784 | 0.00005656  |
| 29 | 44,585,782 | ss86341172  | -0.00075142 | -0.00059974 | -0.00022848 | -0.00066809 | 0.00004126  | -0.00004148 |
| 29 | 44,628,137 | rs41600300  | -0.00005648 | 0.00034145  | 0.00005371  | 0.00013032  | -0.00004817 | -0.00003908 |
| 29 | 44,649,908 | ss86337530  | 0.00005313  | -0.00008978 | 0.00038621  | -0.00022923 | 0.00001713  | -0.00009300 |
| 29 | 44,740,917 | ss86334185  | 0.00079430  | 0.00082804  | 0.00038222  | -0.00025986 | 0.00002142  | 0.00002880  |
| 29 | 44,807,928 | ss117965824 | -0.00026913 | 0.00079928  | -0.00045557 | 0.00002440  | 0.00000569  | 0.00002481  |
| 29 | 44,853,970 | rs42192429  | 0.00005315  | -0.00107690 | 0.00013023  | -0.00052061 | 0.00003071  | 0.00010706  |
| 29 | 44,900,940 | rs43706228  | 0.00089149  | 0.00166157  | -0.00007800 | 0.00120207  | -0.00000796 | -0.00002885 |
| 29 | 44,969,518 | ss86337154  | -0.00025376 | -0.00008685 | 0.00002682  | -0.00024640 | -0.00002614 | -0.00002386 |
| 29 | 44,979,377 | ss86338214  | 0.00021114  | 0.00036588  | -0.00018187 | 0.00021199  | 0.00001482  | 0.00006627  |
| 29 | 44,999,264 | ss86310727  | 0.00133191  | 0.00075573  | 0.00004545  | 0.00060918  | 0.00010639  | 0.00015623  |
| 29 | 45,023,665 | ss86338763  | -0.00019088 | -0.00008685 | 0.00005425  | -0.00023066 | -0.00002614 | -0.00001956 |
| 29 | 45,102,557 | ss86332221  | -0.00129469 | -0.00064203 | -0.00004862 | -0.00111294 | 0.00001335  | -0.00016787 |
| 29 | 45,129,099 | ss86335405  | 0.00063776  | 0.00065799  | 0.00007693  | 0.00047129  | 0.00001030  | 0.00002804  |
| 29 | 45,187,114 | ss86295760  | -0.00047535 | -0.00087672 | -0.00015742 | -0.00006285 | -0.00002459 | 0.00001400  |
| 29 | 45,287,502 | ss86312485  | 0.00053477  | 0.00045858  | 0.00002288  | 0.00071079  | 0.00001575  | -0.00000847 |
| 29 | 45,326,585 | rs42198683  | 0.00021305  | 0.00027334  | -0.00028774 | 0.00099702  | 0.00001472  | -0.00005160 |
| 29 | 45,367,095 | ss86322638  | 0.00039329  | 0.00031861  | 0.00033922  | -0.00017070 | 0.00003571  | -0.00007839 |
| 29 | 45,458,280 | rs43706176  | -0.00020553 | -0.00045743 | 0.00003098  | -0.00005162 | -0.00002502 | 0.00000069  |
| 29 | 45,482,143 | rs29025626  | -0.00084208 | -0.00104550 | -0.00002985 | -0.00024322 | -0.00010494 | -0.00004481 |
| 29 | 45,530,264 | ss86341375  | 0.00019820  | 0.00005755  | 0.00002545  | -0.00001078 | 0.00003298  | 0.00003977  |

<sup>1</sup>UMD3.1 Coordinates. SNPs located within *CAST* and *CAPN1* are shaded in yellow.

<sup>2</sup>Commercialized SNPs are shaded in red.

<sup>3</sup>GBLUP allele substitution effect ( $\alpha$ ) ranks. Values less than 500 are shaded in yellow for the across-breed and green for the within-

<sup>4</sup>GBLUP of SNP allele substitution effects ( $\alpha$ ) estimated as a random effect.

<sup>5</sup>SNP allele substitution effects ( $\beta$ ) estimated as fixed effects in a mixed linear model including the genomic relationship matrix.

<sup>6</sup> $-\log_{10}(P)$ -value for the test of the null hypothesis of an allele substitution effect ( $\beta$ ) of zero. Maximum values are shaded in red. Oth

<sup>7</sup> $-\log_{10}(P)$ -value for the test of the null hypothesis of all haplotype substitution effects ( $H$ ) being zero. Maximum values are shaded i

<sup>8</sup>Number of haplotypes and effective number of haplotypes in parentheses for the 13 (*CAST*) or 31 (*CAPN1*) SNP block centered on

<sup>9</sup>Number Percentage of phenotypic variation in WBSF explained by haplotypes centered on the identified SNP.

|     |                  |                     |              |             |             |             | ASE <sup>5</sup> |             |
|-----|------------------|---------------------|--------------|-------------|-------------|-------------|------------------|-------------|
| BTA | POS <sup>1</sup> | SNP ID <sup>2</sup> | β-All Breeds | β-Angus     | β-Hereford  | β-Charolais | β-Limousin       | β-Simmental |
| 7   | 97,151,592       | rs41656985          | 0.01377207   | -0.01999276 | 0.03740770  | 0.01615795  | -0.00029396      | 0.03399697  |
| 7   | 97,261,052       | rs41656987          | 0.06407879   | 0.08585839  | 0.05622007  | -0.00113931 | 0.15788787       | 0.11469922  |
| 7   | 97,372,656       | rs41570922          | -0.04721657  | -0.10888501 | 0.02478650  | -0.03871002 | -0.15544713      | 0.02536908  |
| 7   | 97,393,157       | rs41615915          | -0.04605863  | 0.00265377  | -0.10743993 | 0.00108729  | -0.05573660      | -0.07783973 |
| 7   | 97,430,691       | ss86295638          | 0.05460805   | -0.00518239 | 0.10506659  | -0.02294942 | -0.04461769      | 0.07698709  |
| 7   | 97,501,859       | ss86310801          | -0.03764247  | -0.02495779 | -0.04955234 | -0.03468353 | 0.08999742       | -0.09143018 |
| 7   | 97,529,872       | ss61472319          | 0.02111581   | -0.02877606 | 0.08140793  | -0.01884309 | 0.10324757       | -0.01642583 |
| 7   | 97,691,853       | ss86290016          | 0.04112449   | 0.13325936  | 0.05822260  | 0.12703600  | 0.04074417       | -0.09219867 |
| 7   | 97,772,240       | ss86312419          | -0.05640512  | -0.07610179 | -0.21729369 | -0.02281948 | 0.30240522       | 0.00927325  |
| 7   | 97,861,341       | rs41593284          | 0.05750871   | 0.01407221  | 0.11133231  | -0.00899134 | 0.24638150       | 0.04204862  |
| 7   | 97,898,940       | rs41593281          | 0.09632991   | 0.07850543  | 0.14152236  | 0.04174867  | 0.01595788       | 0.08909754  |
| 7   | 97,961,659       | ss117969141         | 0.04610124   | 0.12701127  | 0.01169940  | 0.00594871  | 0.04862822       | 0.17698328  |
| 7   | 98,013,150       | ss117968909         | 0.00300209   | -0.01193793 | -0.09714359 | 0.05201490  | 0.02690835       | 0.15605575  |
| 7   | 98,173,299       | ss86290989          | 0.00767338   | 0.01261753  | -0.06474281 | 0.07826779  | 0.01956097       | 0.02321594  |
| 7   | 98,194,828       | rs41658549          | -0.00401437  | -0.04982220 | 0.09135510  | -0.13132990 | 0.02229160       | 0.04134878  |
| 7   | 98,254,815       | rs41658542          | 0.02188950   | -0.01574779 | 0.20327112  | -0.10260593 | -0.07012338      | 0.03239528  |
| 7   | 98,375,640       | ss86329349          | 0.09183851   | 0.12926199  | 0.20569660  | 0.00380099  | 0.11857929       | -0.02275644 |
| 7   | 98,495,888       | rs43529872          | 0.14912943   | 0.12638542  | 0.20438144  | 0.18318184  | 0.24750333       | -0.03846871 |
| 7   | 98,498,047       | ss86321563          | 0.14221431   | 0.15154723  | 0.20916753  | 0.15264208  | 0.18729389       | -0.04713413 |
| 7   | 98,538,952       | rs41660170          | 0.07895436   | 0.13526771  | -0.00409153 | 0.08051120  | 0.07729644       | 0.11766511  |
| 7   | 98,566,391       | ss117962527         | -0.09262624  | -0.16100475 | -0.06040231 | -0.16610346 | -0.05483045      | 0.00153287  |
| 7   | 98,579,574       | rs41255587          | 0.15449911   | 0.14576743  | 0.21255338  | 0.19065204  | 0.14454926       | -0.02075111 |
| 7   | 98,635,208       | ss86300200          | -0.07152941  | -0.03340736 | -0.16969513 | 0.03199936  | -0.10216313      | -0.05727451 |
| 7   | 98,646,770       | rs41596489          | 0.08027895   | 0.08287525  | 0.18982409  | 0.00170165  | 0.06672588       | 0.01508636  |
| 7   | 98,680,293       | ss86315737          | -0.05859165  | -0.10106432 | -0.15573983 | 0.02425142  | 0.06258840       | -0.00192055 |
| 7   | 98,726,055       | rs29018251          | 0.02359443   | -0.12618996 | 0.07884128  | 0.05065498  | 0.00635118       | 0.01937443  |
| 7   | 98,757,265       | ss86303738          | 0.02532671   | -0.01615925 | 0.05567595  | 0.03238808  | -0.01262411      | 0.11054776  |
| 7   | 98,820,742       | ss86324113          | 0.07294052   | 0.08716323  | 0.17291781  | -0.01161769 | -0.05684945      | 0.10538010  |
| 7   | 98,887,313       | rs41568595          | -0.03694200  | 0.01652002  | -0.02094997 | -0.18933093 | 0.00660686       | -0.02603140 |
| 7   | 98,907,404       | ss86291843          | -0.02347963  | -0.00112256 | -0.03939083 | -0.02093560 | -0.12977007      | 0.03256895  |
| 7   | 98,974,456       | ss86339659          | 0.02520614   | 0.02355067  | 0.04765437  | 0.01524006  | 0.04806978       | 0.01211776  |
| 7   | 99,024,444       | ss117968912         | -0.00962625  | -0.02314016 | 0.04887861  | -0.06772105 | 0.06137752       | -0.05045382 |
| 7   | 99,085,299       | rs41590403          | -0.03960914  | -0.05700088 | 0.02546463  | -0.07769533 | -0.22934220      | -0.01881188 |
| 7   | 99,130,598       | ss86333606          | -0.06239241  | 0.00956325  | -0.14975990 | 0.02080513  | 0.03399904       | 0.11373474  |
| 7   | 99,178,748       | rs41568774          | -0.00494952  | -0.00595571 | 0.04305756  | -0.00422053 | -0.06928228      | -0.03732380 |
| 7   | 99,215,474       | ss86324013          | 0.03866208   | 0.00323942  | 0.13672049  | -0.00375089 | 0.01211855       | -0.03134186 |
| 7   | 99,344,820       | rs41622872          | -0.04295510  | 0.02002393  | -0.12011580 | 0.01951865  | -0.13440981      | -0.07138409 |
| 7   | 99,399,852       | ss117968895         | 0.00566668   | -0.05979255 | 0.05792219  | -0.00246880 | -0.06191476      | -0.01295397 |
| 7   | 99,492,904       | ss86296856          | -0.06625218  | -0.10116761 | -0.17772993 | -0.00151215 | -0.01224771      | 0.01697012  |
| 7   | 99,635,841       | ss86339853          | 0.00560736   | 0.00581627  | 0.05035461  | -0.05124237 | 0.08750034       | -0.07198733 |
| 7   | 99,687,614       | rs41657025          | 0.01600630   | -0.05598055 | 0.03944556  | 0.02693623  | -0.00419388      | 0.07459634  |
| 7   | 99,845,133       | rs41624339          | 0.05420017   | 0.01451857  | 0.08271281  | 0.04128013  | -0.15385321      | 0.10367658  |
| 7   | 99,919,908       | ss86339607          | 0.00320745   | -0.00812169 | -0.00021135 | 0.05011518  | 0.06678217       | -0.03988769 |
| 7   | 100,015,468      | ss86310226          | -0.00884300  | 0.01313929  | -0.00799969 | -0.04322683 | 0.07312651       | -0.04484400 |
| 29  | 42,406,544       | ss86319674          | 0.00499755   | 0.13127994  | -0.02539683 | -0.05011073 | 0.37427564       | -0.07250370 |
| 29  | 42,455,680       | ss117974470         | -0.01114205  | -0.00287066 | 0.01625321  | 0.01350677  | -0.08903101      | -0.06311767 |
| 29  | 42,620,218       | rs42189770          | 0.00437862   | 0.01893309  | -0.02713130 | 0.07412626  | -0.02035679      | -0.02046697 |
| 29  | 42,651,294       | rs43706142          | -0.00912868  | -0.07832798 | 0.04644727  | -0.03432996 | 0.01516783       | 0.01150035  |
| 29  | 42,696,595       | rs42189112          | 0.02244031   | 0.06801028  | -0.03648918 | 0.10811249  | -0.00408642      | 0.08595896  |
| 29  | 42,749,808       | rs29020063          | -0.00802797  | 0.03088923  | 0.01431881  | -0.08214113 | 0.06422537       | -0.11007124 |
| 29  | 42,842,353       | ss117974486         | -0.02723432  | -0.05483318 | 0.06254769  | 0.01804422  | -0.09758154      | -0.20088805 |
| 29  | 42,897,144       | ss86322358          | 0.01390338   | -0.04068813 | 0.02886829  | 0.01772594  | -0.01746038      | 0.10763037  |

|    |            |            |             |             |             |             |             |             |
|----|------------|------------|-------------|-------------|-------------|-------------|-------------|-------------|
| 29 | 43,006,000 | ss86339964 | 0.00786039  | -0.05214215 | 0.02769884  | 0.01772594  | -0.01746038 | 0.09288296  |
| 29 | 43,043,207 | ss86341572 | 0.01905446  | -0.06102574 | 0.02423195  | 0.06732475  | -0.08042507 | 0.10649011  |
| 29 | 43,108,445 | ss86337140 | -0.09515691 | -0.18767192 | -0.13426794 | -0.05009274 | -0.03198651 | -0.10713556 |
| 29 | 43,129,250 | ss86337549 | -0.11213504 | -0.36449310 | -0.05938852 | -0.01576700 | -0.11245798 | -0.07599159 |
| 29 | 43,189,370 | ss86319044 | -0.09177632 | -0.35818174 | -0.05938852 | -0.00449407 | -0.08165142 | -0.07599159 |
| 29 | 43,224,753 | rs29013208 | 0.07685161  | 0.23681481  | -0.06367290 | -0.03767127 | 0.07834478  | 0.13411425  |
| 29 | 43,269,744 | ss86282762 | 0.06673067  | 0.22340633  | -0.08516222 | -0.04797645 | 0.06672672  | 0.13893634  |
| 29 | 43,304,256 | rs29024708 | -0.05533914 | -0.18017752 | 0.05280083  | -0.03602372 | -0.02059741 | -0.21167262 |
| 29 | 43,328,607 | ss86295061 | 0.00409931  | 0.06677072  | -0.08406764 | 0.05513809  | 0.03738891  | -0.02303009 |
| 29 | 43,429,511 | ss86318094 | -0.08927452 | -0.11940061 | -0.19002689 | 0.02397019  | -0.17416374 | -0.07217357 |
| 29 | 43,466,342 | ss86310741 | -0.05527207 | -0.18298300 | -0.03897509 | -0.08345126 | 0.21664736  | -0.15334543 |
| 29 | 43,498,073 | ss86338800 | 0.05956164  | 0.11996911  | 0.01582097  | 0.12870934  | -0.13744882 | 0.12546311  |
| 29 | 43,611,640 | ss86298040 | 0.07322512  | 0.03240417  | 0.07923634  | 0.11566400  | -0.02602530 | 0.17796485  |
| 29 | 43,652,252 | ss86327310 | -0.05350543 | -0.13120156 | -0.04690503 | -0.00705293 | -0.05862478 | -0.10243448 |
| 29 | 43,686,401 | ss86325323 | -0.01025002 | -0.12481137 | -0.05790675 | 0.07998412  | 0.02080392  | 0.07436958  |
| 29 | 43,709,769 | ss86290081 | -0.03614715 | -0.09808855 | -0.14603245 | 0.04284288  | 0.06642355  | -0.04706384 |
| 29 | 43,747,765 | rs42190085 | -0.03252887 | -0.03454110 | 0.00266994  | -0.06688717 | -0.03643018 | -0.02716611 |
| 29 | 43,749,527 | ss86299346 | -0.01815565 | 0.04194873  | 0.00506304  | -0.04813533 | -0.07093084 | -0.05943258 |
| 29 | 43,777,249 | ss86299989 | -0.00379751 | -0.08865721 | -0.00587409 | 0.03403038  | 0.00214447  | -0.02166572 |
| 29 | 43,826,144 | rs42191289 | 0.00538920  | 0.08261932  | -0.04308125 | -0.01792714 | -0.10331144 | 0.16352930  |
| 29 | 43,839,783 | ss86336460 | 0.02873918  | 0.09722623  | -0.03889303 | 0.04674230  | -0.05443953 | 0.17591056  |
| 29 | 43,914,923 | ss86335514 | 0.14099316  | 0.12325906  | 0.11582581  | 0.17858418  | 0.10103476  | 0.27239461  |
| 29 | 44,000,728 | rs42191319 | -0.02134130 | 0.00009678  | -0.04485603 | 0.05849863  | -0.10881374 | 0.02442284  |
| 29 | 44,029,526 | rs42192038 | -0.04465678 | -0.04790513 | -0.01687600 | -0.05861484 | -0.06926916 | -0.12931805 |
| 29 | 44,042,363 | rs42192064 | -0.09088154 | -0.11220353 | -0.06259312 | -0.03927838 | 0.01761857  | -0.31307293 |
| 29 | 44,049,244 | rs42192077 | 0.02578055  | -0.02692225 | 0.08254911  | 0.01055042  | -0.00004142 | -0.01123121 |
| 29 | 44,050,471 | ss86284058 | -0.06361724 | 0.02388787  | -0.19851647 | -0.07943526 | -0.02527633 | 0.08868873  |
| 29 | 44,051,567 | rs42192079 | -0.02210319 | 0.01920409  | -0.07340928 | -0.01089515 | -0.00185196 | 0.01290773  |
| 29 | 44,053,733 | rs42192083 | 0.02086679  | -0.02545535 | 0.07588543  | 0.00806255  | 0.00679728  | -0.01483180 |
| 29 | 44,054,901 | rs42192084 | 0.01512321  | -0.02258374 | 0.04596259  | 0.04186951  | 0.02413509  | -0.05674960 |
| 29 | 44,058,688 | rs42192090 | 0.02968789  | 0.06906875  | -0.02816224 | 0.11941891  | -0.07838293 | 0.05512612  |
| 29 | 44,060,410 | rs42192096 | -0.02832327 | -0.07343302 | 0.04272696  | -0.09131420 | 0.06035150  | -0.08307020 |
| 29 | 44,062,694 | rs42192100 | -0.02736293 | -0.07396977 | 0.04226760  | -0.08474445 | 0.05322737  | -0.07665678 |
| 29 | 44,063,938 | rs17872078 | -0.18564305 | -0.18455479 | -0.20510618 | -0.16345367 | -0.03249970 | -0.23021449 |
| 29 | 44,067,234 | rs17872093 | 0.02496105  | 0.07343302  | -0.05406733 | 0.09131420  | -0.05322737 | 0.08515734  |
| 29 | 44,067,796 | rs17871984 | 0.17226965  | 0.20960280  | 0.25854084  | 0.10460733  | 0.08033891  | 0.14060072  |
| 29 | 44,068,143 | rs17870631 | 0.23869986  | 0.22119704  | 0.24379122  | 0.22023146  | 0.00547252  | 0.34767985  |
| 29 | 44,068,346 | rs17870628 | 0.16042843  | 0.15402954  | 0.24841222  | 0.10918790  | -0.05396674 | 0.19102806  |
| 29 | 44,068,445 | rs17870626 | 0.22829997  | 0.21152447  | 0.23663609  | 0.21618169  | -0.02950121 | 0.32679359  |
| 29 | 44,068,519 | rs17872010 | 0.22980629  | 0.21678554  | 0.23000251  | 0.22023146  | 0.00547252  | 0.33560285  |
| 29 | 44,068,580 | rs17872004 | 0.23576592  | 0.22119704  | 0.24158328  | 0.21914000  | 0.01402673  | 0.33693156  |
| 29 | 44,068,812 | rs17872003 | -0.23425299 | -0.22039076 | -0.24087221 | -0.22570015 | 0.01719659  | -0.33744060 |
| 29 | 44,069,063 | rs17812000 | -0.23938706 | -0.27604109 | -0.21680105 | -0.22023146 | -0.00547252 | -0.33888089 |
| 29 | 44,069,177 | rs17872006 | -0.20865952 | -0.22809167 | -0.21525294 | -0.17836251 | 0.05335006  | -0.31640257 |
| 29 | 44,070,713 | rs42192103 | -0.23126101 | -0.20077133 | -0.25377584 | -0.23262707 | 0.04616506  | -0.33919363 |
| 29 | 44,070,881 | rs42192105 | -0.13150092 | -0.09916322 | -0.20618399 | -0.03162694 | 0.02776421  | -0.16146931 |
| 29 | 44,071,034 | rs42192107 | -0.14426575 | -0.11047033 | -0.21343493 | -0.07328780 | 0.02776421  | -0.16118552 |
| 29 | 44,071,135 | rs42192108 | -0.05688668 | -0.02886829 | -0.03653651 | -0.04193928 | -0.29972195 | -0.02004771 |
| 29 | 44,071,593 | rs42192109 | -0.05027538 | -0.10884482 | 0.01585778  | -0.12844689 | 0.08759822  | -0.09627713 |
| 29 | 44,085,642 | rs17871051 | 0.14188557  | 0.30364766  | 0.10809754  | 0.11126940  | 0.13503153  | 0.20082779  |
| 29 | 44,085,769 | rs17871058 | 0.14392345  | 0.15281348  | 0.06846588  | 0.18131448  | 0.28735643  | 0.19762528  |
| 29 | 44,087,205 | rs17872032 | 0.18873706  | 0.25640780  | 0.03850535  | 0.20027467  | 0.15725079  | 0.30972904  |
| 29 | 44,087,356 | rs17872033 | -0.12775860 | -0.27170879 | -0.10219163 | -0.10479101 | -0.15498932 | -0.15942987 |
| 29 | 44,087,629 | rs17872050 | 0.14442059  | 0.16563130  | 0.06653446  | 0.18413259  | 0.30762227  | 0.17956041  |
| 29 | 44,087,858 | rs17872151 | 0.14001255  | -0.02272857 | 0.30154212  | 0.12323939  | 0.07713691  | 0.18930825  |



|    |            |             |             |             |             |             |             |             |
|----|------------|-------------|-------------|-------------|-------------|-------------|-------------|-------------|
| 29 | 44,088,897 | rs17870847  | -0.14124160 | -0.15463556 | -0.05878994 | -0.18885633 | -0.30340823 | -0.17524866 |
| 29 | 44,110,295 | rs42192119  | -0.01942996 | 0.01451903  | -0.02155698 | -0.06463021 | -0.08669320 | 0.03046439  |
| 29 | 44,119,671 | rs42195143  | 0.00783300  | -0.02935938 | 0.07389328  | -0.00669293 | 0.02115000  | -0.02711373 |
| 29 | 44,122,272 | rs42194216  | -0.03172111 | 0.02819610  | -0.08098997 | -0.04973577 | 0.02964052  | -0.00160258 |
| 29 | 44,125,747 | rs42194178  | -0.03356792 | 0.03659072  | -0.09186858 | -0.04942879 | 0.02964052  | -0.00160258 |
| 29 | 44,130,887 | rs42194132  | 0.02644605  | -0.03659072 | 0.08421906  | 0.05072096  | -0.02964052 | -0.03311083 |
| 29 | 44,154,126 | rs42193349  | -0.05305730 | 0.22356813  | -0.10323256 | -0.05776275 | 0.04588778  | -0.09831775 |
| 29 | 44,172,614 | ss117965984 | -0.03964292 | 0.00112919  | -0.06918327 | -0.04362937 | 0.04977295  | -0.10354199 |
| 29 | 44,196,154 | ss86318958  | 0.01564406  | 0.11621015  | 0.08928295  | -0.04546044 | 0.03894493  | -0.02006039 |
| 29 | 44,208,978 | rs29003633  | 0.07439988  | 0.43869793  | 0.00575558  | 0.03243145  | -0.04998931 | -0.08817917 |
| 29 | 44,223,148 | ss86323783  | 0.07582241  | 0.21702321  | 0.00803405  | 0.12606020  | 0.13368766  | 0.02592427  |
| 29 | 44,243,444 | ss86313099  | -0.00549653 | 0.11812362  | -0.10476431 | 0.08059616  | 0.02143301  | -0.03460116 |
| 29 | 44,325,408 | ss86292140  | -0.16398496 | -0.20530041 | -0.19003334 | -0.12468567 | -0.10603965 | -0.24574655 |
| 29 | 44,372,611 | ss86329852  | -0.03713291 | 0.00488436  | -0.08660821 | -0.09708762 | -0.17343672 | 0.13482641  |
| 29 | 44,395,075 | ss86333994  | -0.06754849 | -0.10992804 | -0.09616456 | 0.00711078  | -0.03712152 | -0.16178806 |
| 29 | 44,416,282 | rs43709648  | -0.13069556 | -0.28351741 | -0.18944356 | -0.09438042 | -0.01593376 | -0.08385696 |
| 29 | 44,546,564 | ss86288185  | 0.05494993  | 0.09262489  | 0.08928476  | 0.05312496  | -0.01034263 | 0.05095507  |
| 29 | 44,585,782 | ss86341172  | -0.03866292 | -0.06206035 | -0.05039949 | -0.08198585 | 0.06203462  | -0.03992657 |
| 29 | 44,628,137 | rs41600300  | -0.01483796 | 0.20889018  | 0.15455551  | 0.06038629  | -0.18452356 | -0.14991919 |
| 29 | 44,649,908 | ss86337530  | 0.00294146  | -0.01196893 | 0.08771622  | -0.02822089 | 0.02041584  | -0.09897733 |
| 29 | 44,740,917 | ss86334185  | 0.05012176  | 0.10695692  | 0.08835503  | -0.03612618 | 0.10055830  | 0.03904043  |
| 29 | 44,807,928 | ss117965824 | -0.01428477 | 0.10722949  | -0.08601306 | 0.00337124  | 0.00765424  | 0.02422262  |
| 29 | 44,853,970 | rs42192429  | 0.00310823  | -0.14208317 | 0.02747885  | -0.07932534 | 0.06115144  | 0.11080152  |
| 29 | 44,900,940 | rs43706228  | 0.04401726  | 0.16432737  | -0.01507454 | 0.14127813  | -0.01453902 | -0.02478305 |
| 29 | 44,969,518 | ss86337154  | -0.08569177 | -0.09080754 | 0.27706137  | -0.16974889 | -0.08763089 | -0.07547633 |
| 29 | 44,979,377 | ss86338214  | 0.00973100  | 0.03288093  | -0.03428688 | 0.02287154  | 0.02023673  | 0.05906225  |
| 29 | 44,999,264 | ss86310727  | 0.07636034  | 0.08409333  | 0.01064296  | 0.09008127  | 0.16345165  | 0.16162329  |
| 29 | 45,023,665 | ss86338763  | -0.06266468 | -0.09080754 | 0.56904494  | -0.14493435 | -0.08763089 | -0.06060103 |
| 29 | 45,102,557 | ss86332221  | -0.09128831 | -0.10489015 | -0.01759630 | -0.20456570 | 0.01847027  | -0.16251600 |
| 29 | 45,129,099 | ss86335405  | 0.11751600  | 0.15237997  | 0.16724531  | 0.20802589  | 0.03794230  | 0.08782773  |
| 29 | 45,187,114 | ss86295760  | -0.02403866 | -0.10408408 | -0.03232491 | -0.00787294 | -0.03145318 | 0.01223186  |
| 29 | 45,287,502 | ss86312485  | 0.09994421  | 0.09989672  | 0.05326782  | 0.21938837  | 0.26063282  | -0.02542529 |
| 29 | 45,326,585 | rs42198683  | 0.01064705  | 0.03273957  | -0.05642473 | 0.10167291  | 0.02256656  | -0.05231106 |
| 29 | 45,367,095 | ss86322638  | 0.02307329  | 0.03872453  | 0.09838548  | -0.01799483 | 0.09863873  | -0.08139580 |
| 29 | 45,458,280 | rs43706176  | -0.02873231 | -0.11397784 | 0.07484033  | -0.01161712 | -0.08531336 | 0.00126990  |
| 29 | 45,482,143 | rs29025626  | -0.05831395 | -0.18623897 | -0.00657759 | -0.04365267 | -0.32231770 | -0.06272849 |
| 29 | 45,530,264 | ss86341375  | 0.02131837  | 0.05111941  | 0.00589401  | -0.00306374 | 0.15679441  | 0.20788969  |

<sup>1</sup>UMD3.1 Coordinates. SNPs located within *CAST* and *CAPN1* are shaded in yellow.

<sup>2</sup>Commercialized SNPs are shaded in red.

<sup>3</sup>GBLUP allele substitution effect ( $\alpha$ ) ranks. Values less than 500 are shaded in yellow for the across-breed and green for the within-breed.

<sup>4</sup>GBLUP of SNP allele substitution effects ( $\alpha$ ) estimated as a random effect.

<sup>5</sup>SNP allele substitution effects ( $\beta$ ) estimated as fixed effects in a mixed linear model including the genomic relationship matrix.

<sup>6</sup> $-\log_{10}(P)$ -value for the test of the null hypothesis of an allele substitution effect ( $\beta$ ) of zero. Maximum values are shaded in red. Other values are shaded in yellow.

<sup>7</sup> $-\log_{10}(P)$ -value for the test of the null hypothesis of all haplotype substitution effects ( $H$ ) being zero. Maximum values are shaded in red. Other values are shaded in yellow.

<sup>8</sup>Number of haplotypes and effective number of haplotypes in parentheses for the 13 (*CAST*) or 31 (*CAPN1*) SNP block centered on the identified SNP.

<sup>9</sup>Number Percentage of phenotypic variation in WBSF explained by haplotypes centered on the identified SNP.

| BTA | POS <sup>1</sup> | SNP ID <sup>2</sup> | β-All Breeds | β-Angus    | β-Hereford | β-Charolais | β-Limousin | β-Simmental |
|-----|------------------|---------------------|--------------|------------|------------|-------------|------------|-------------|
| 7   | 97,151,592       | rs41656985          | 0.25920819   | 0.19065791 | 0.38791104 | 0.17268288  | 0.00129203 | 0.24547389  |
| 7   | 97,261,052       | rs41656987          | 1.76394501   | 0.96309267 | 0.46932913 | 0.00960706  | 1.15663403 | 1.13658381  |
| 7   | 97,372,656       | rs41570922          | 0.51757650   | 0.70940830 | 0.06022060 | 0.24466141  | 0.62472795 | 0.10403711  |
| 7   | 97,393,157       | rs41615915          | 1.21374534   | 0.02346959 | 1.51546840 | 0.00867879  | 0.28640193 | 0.65871607  |
| 7   | 97,430,691       | ss86295638          | 1.19548289   | 0.02323031 | 1.47921826 | 0.16870415  | 0.19703810 | 0.49965269  |
| 7   | 97,501,859       | ss86310801          | 0.57707351   | 0.12657802 | 0.34928548 | 0.26680432  | 0.48566729 | 0.50598038  |
| 7   | 97,529,872       | ss61472319          | 0.43312604   | 0.30306271 | 1.11617585 | 0.19968551  | 0.64220544 | 0.10489070  |
| 7   | 97,691,853       | ss86290016          | 0.28588801   | 0.40039921 | 0.14156066 | 0.60508426  | 0.08498000 | 0.37342394  |
| 7   | 97,772,240       | ss86312419          | 0.86395033   | 0.75292586 | 1.67261725 | 0.15800490  | 0.91674896 | 0.03562833  |
| 7   | 97,861,341       | rs41593284          | 1.53245331   | 0.12732425 | 1.13126148 | 0.07533843  | 2.64951708 | 0.29967328  |
| 7   | 97,898,940       | rs41593281          | 3.42270182   | 0.71645917 | 2.89390082 | 0.29177371  | 0.06921540 | 0.71900816  |
| 7   | 97,961,659       | ss117969141         | 0.35277075   | 0.54610435 | 0.03956972 | 0.02062259  | 0.07559241 | 0.54397980  |
| 7   | 98,013,150       | ss117968909         | 0.04524314   | 0.10712272 | 1.36976476 | 0.69474730  | 0.12949977 | 1.90813017  |
| 7   | 98,173,299       | ss86290989          | 0.10943140   | 0.10718998 | 0.60809591 | 0.91744683  | 0.09275246 | 0.13070592  |
| 7   | 98,194,828       | rs41658549          | 0.05932558   | 0.62843426 | 1.13325108 | 2.56758808  | 0.09789700 | 0.31044044  |
| 7   | 98,254,815       | rs41658542          | 0.39532965   | 0.15482480 | 3.06228709 | 1.65770810  | 0.40341524 | 0.21863565  |
| 7   | 98,375,640       | ss86329349          | 1.99903332   | 1.38818084 | 2.35512143 | 0.02362894  | 0.35954871 | 0.09411136  |
| 7   | 98,495,888       | rs43529872          | 7.74766418   | 1.99768902 | 5.22892170 | 3.62427416  | 1.47999444 | 0.24953504  |
| 7   | 98,498,047       | ss86321563          | 7.42639931   | 2.56544376 | 5.48906355 | 3.03632723  | 1.00081075 | 0.34592414  |
| 7   | 98,538,952       | rs41660170          | 1.19616937   | 1.31606193 | 0.01343470 | 0.72869343  | 0.20372510 | 0.51234229  |
| 7   | 98,566,391       | ss117962527         | 2.13133465   | 1.95083162 | 0.27369699 | 2.44272959  | 0.25132133 | 0.00778098  |
| 7   | 98,579,574       | rs41255587          | 8.94616131   | 2.54505254 | 5.63316775 | 4.25399597  | 1.02795263 | 0.12970451  |
| 7   | 98,635,208       | ss86300200          | 2.78390969   | 0.39024136 | 3.88488884 | 0.38083683  | 0.68919867 | 0.49697830  |
| 7   | 98,646,770       | rs41596489          | 3.09302733   | 1.42263877 | 4.15919781 | 0.01538183  | 0.31858437 | 0.09451937  |
| 7   | 98,680,293       | ss86315737          | 1.85792616   | 1.73175280 | 3.13848683 | 0.24889004  | 0.33750113 | 0.01134466  |
| 7   | 98,726,055       | rs29018251          | 0.42728013   | 1.90332787 | 0.82779401 | 0.65329731  | 0.02111718 | 0.12131636  |
| 7   | 98,757,265       | ss86303738          | 0.38498763   | 0.14407068 | 0.26033788 | 0.27396792  | 0.05509740 | 0.90591284  |
| 7   | 98,820,742       | ss86324113          | 2.38541310   | 1.44419614 | 2.83381698 | 0.10584866  | 0.24004092 | 1.05287378  |
| 7   | 98,887,313       | rs41568595          | 0.53301860   | 0.08132593 | 0.13823755 | 1.53243070  | 0.02459171 | 0.11513550  |
| 7   | 98,907,404       | ss86291843          | 0.49381227   | 0.00947962 | 0.44931494 | 0.21138458  | 0.82054150 | 0.20763072  |
| 7   | 98,974,456       | ss86339659          | 0.54215062   | 0.26713043 | 0.57315687 | 0.14318927  | 0.19621006 | 0.06602532  |
| 7   | 99,024,444       | ss117968912         | 0.16733868   | 0.22504722 | 0.58555919 | 1.02559764  | 0.31898397 | 0.38434202  |
| 7   | 99,085,299       | rs41590403          | 0.69481474   | 0.39318251 | 0.18795130 | 0.75050635  | 1.24660458 | 0.10624050  |
| 7   | 99,130,598       | ss86333606          | 1.45570588   | 0.06251611 | 3.10294183 | 0.10574727  | 0.10273524 | 0.70938049  |
| 7   | 99,178,748       | rs41568774          | 0.06868082   | 0.04898987 | 0.34108982 | 0.03196463  | 0.33551761 | 0.26193372  |
| 7   | 99,215,474       | ss86324013          | 0.79647808   | 0.02351372 | 1.69652140 | 0.02952516  | 0.05206018 | 0.18142548  |
| 7   | 99,344,820       | rs41622872          | 1.14352553   | 0.20570883 | 1.95773851 | 0.19025349  | 1.01497461 | 0.59501667  |
| 7   | 99,399,852       | ss117968895         | 0.05287460   | 0.44925767 | 0.36214999 | 0.01233920  | 0.11948527 | 0.04633037  |
| 7   | 99,492,904       | ss86296856          | 1.15969824   | 1.09708746 | 1.54697553 | 0.00766042  | 0.04497447 | 0.06521665  |
| 7   | 99,635,841       | ss86339853          | 0.08261138   | 0.04523761 | 0.50695580 | 0.60607729  | 0.47188976 | 0.57737955  |
| 7   | 99,687,614       | rs41657025          | 0.26637232   | 0.67054698 | 0.28528814 | 0.29544248  | 0.01572183 | 0.65781175  |
| 7   | 99,845,133       | rs41624339          | 1.34660053   | 0.12133397 | 1.11618627 | 0.41055563  | 0.56501728 | 0.71205727  |
| 7   | 99,919,908       | ss86339607          | 0.04573644   | 0.07034137 | 0.00151539 | 0.49076674  | 0.36871254 | 0.27101227  |
| 7   | 100,015,468      | ss86310226          | 0.13573436   | 0.12458893 | 0.04893090 | 0.49885840  | 0.39851707 | 0.32578504  |
| 29  | 42,406,544       | ss86319674          | 0.04986806   | 1.37866264 | 0.16134861 | 0.32115619  | 0.87009257 | 0.39403172  |
| 29  | 42,455,680       | ss117974470         | 0.19574411   | 0.02641378 | 0.14141656 | 0.11127875  | 0.59456400 | 0.55434182  |
| 29  | 42,620,218       | rs42189770          | 0.05722611   | 0.14305650 | 0.22931731 | 0.75240467  | 0.07529309 | 0.11527340  |
| 29  | 42,651,294       | rs43706142          | 0.13527357   | 1.19216972 | 0.32601885 | 0.36725161  | 0.06524151 | 0.06544274  |
| 29  | 42,696,595       | rs42189112          | 0.44441091   | 0.88270802 | 0.37685810 | 1.74463604  | 0.01829748 | 0.76562942  |
| 29  | 42,749,808       | rs29020063          | 0.12666589   | 0.35244490 | 0.11091297 | 1.11550797  | 0.37213472 | 1.16115545  |
| 29  | 42,842,353       | ss117974486         | 0.55536657   | 0.69280424 | 0.64651365 | 0.16318906  | 0.62728700 | 3.18305827  |
| 29  | 42,897,144       | ss86322358          | 0.18345331   | 0.39458459 | 0.13964490 | 0.14498396  | 0.06992430 | 0.80845199  |

|    |            |            |             |            |            |            |            |            |
|----|------------|------------|-------------|------------|------------|------------|------------|------------|
| 29 | 43,006,000 | ss86339964 | 0.09586061  | 0.53898948 | 0.13318280 | 0.14498396 | 0.06992430 | 0.64216062 |
| 29 | 43,043,207 | ss86341572 | 0.29218063  | 0.76407239 | 0.12313821 | 0.82608844 | 0.42613324 | 0.96006708 |
| 29 | 43,108,445 | ss86337140 | 2.45598566  | 2.31486819 | 1.44440671 | 0.37952271 | 0.13871960 | 0.77016154 |
| 29 | 43,129,250 | ss86337549 | 1.61915754  | 4.63029649 | 0.09175169 | 0.06199632 | 0.59514087 | 0.35844100 |
| 29 | 43,189,370 | ss86319044 | 1.25955168  | 4.56366938 | 0.09175169 | 0.01982073 | 0.38561856 | 0.35844100 |
| 29 | 43,224,753 | rs29013208 | 1.12052175  | 3.01526390 | 0.12262529 | 0.22241437 | 0.37189194 | 0.87811532 |
| 29 | 43,269,744 | ss86282762 | 0.76185346  | 2.53505836 | 0.15756175 | 0.28646199 | 0.27662167 | 0.48219951 |
| 29 | 43,304,256 | rs29024708 | 1.06275615  | 2.25837870 | 0.36526377 | 0.27590072 | 0.08300408 | 2.41431365 |
| 29 | 43,328,607 | ss86295061 | 0.05426188  | 0.94535620 | 0.72983337 | 0.54636948 | 0.16252304 | 0.14634925 |
| 29 | 43,429,511 | ss86318094 | 3.30593304  | 2.47535623 | 3.68132176 | 0.23311529 | 0.77433371 | 0.60737632 |
| 29 | 43,466,342 | ss86310741 | 0.96296598  | 2.56839941 | 0.28684653 | 0.70252500 | 1.08226275 | 0.86478838 |
| 29 | 43,498,073 | ss86338800 | 1.52028312  | 1.76670225 | 0.13365834 | 1.83411013 | 0.61664702 | 1.03469542 |
| 29 | 43,611,640 | ss86298040 | 2.58028835  | 0.36374051 | 1.04977109 | 2.06890532 | 0.12475821 | 2.28082929 |
| 29 | 43,652,252 | ss86327310 | 1.68525775  | 2.97699466 | 0.55688163 | 0.06156001 | 0.32155822 | 1.12682579 |
| 29 | 43,686,401 | ss86325323 | 0.12890225  | 1.76992464 | 0.55000156 | 0.70435872 | 0.04177780 | 0.43177499 |
| 29 | 43,709,769 | ss86290081 | 0.73588744  | 1.88286213 | 1.40490730 | 0.48685638 | 0.33902519 | 0.31447126 |
| 29 | 43,747,765 | rs42190085 | 0.61498554  | 0.29925040 | 0.01867855 | 0.69135855 | 0.15545894 | 0.15423447 |
| 29 | 43,749,527 | ss86299346 | 0.23117133  | 0.28797421 | 0.03062952 | 0.39580652 | 0.14410590 | 0.32099723 |
| 29 | 43,777,249 | ss86299989 | 0.05204709  | 1.23855542 | 0.04279939 | 0.30596175 | 0.00862948 | 0.12086964 |
| 29 | 43,826,144 | rs42191289 | 0.08355832  | 1.07275064 | 0.46344422 | 0.17992963 | 0.60679991 | 2.10421872 |
| 29 | 43,839,783 | ss86336460 | 0.65687172  | 1.57750548 | 0.42813638 | 0.60240929 | 0.27736123 | 2.57848708 |
| 29 | 43,914,923 | ss86335514 | 5.41309793  | 1.21043891 | 1.29638005 | 3.23934367 | 0.57977131 | 3.48219782 |
| 29 | 44,000,728 | rs42191319 | 0.28733855  | 0.00041707 | 0.43862251 | 0.33148269 | 0.35713837 | 0.11318397 |
| 29 | 44,029,526 | rs42192038 | 1.20751437  | 0.61860399 | 0.15163110 | 0.76352207 | 0.29883743 | 1.50891107 |
| 29 | 44,042,363 | rs42192064 | 3.78983596  | 2.11305517 | 0.81294077 | 0.43141451 | 0.07967046 | 6.51065616 |
| 29 | 44,049,244 | rs42192077 | 0.53544650  | 0.28049136 | 1.11635461 | 0.09636135 | 0.00017937 | 0.06853338 |
| 29 | 44,050,471 | ss86284058 | 1.31634950  | 0.18165119 | 2.73155940 | 0.77897574 | 0.08559228 | 0.55261272 |
| 29 | 44,051,567 | rs42192079 | 0.43791985  | 0.18793165 | 0.94534508 | 0.09995925 | 0.00801219 | 0.08018721 |
| 29 | 44,053,733 | rs42192083 | 0.40600605  | 0.26290107 | 0.98615509 | 0.07197118 | 0.03036354 | 0.09347804 |
| 29 | 44,054,901 | rs42192084 | 0.23271677  | 0.19155845 | 0.43966180 | 0.42005085 | 0.10259460 | 0.34485314 |
| 29 | 44,058,688 | rs42192090 | 0.63374532  | 1.03088313 | 0.26325766 | 2.16293094 | 0.44993328 | 0.45997855 |
| 29 | 44,060,410 | rs42192096 | 0.58111065  | 1.09484368 | 0.44353513 | 1.43528346 | 0.29247259 | 0.79125781 |
| 29 | 44,062,694 | rs42192100 | 0.55597264  | 1.10606032 | 0.43772073 | 1.27617242 | 0.24952277 | 0.72058476 |
| 29 | 44,063,938 | rs17872078 | 11.06385692 | 4.73157664 | 3.95490039 | 3.60275558 | 0.12298021 | 3.56044339 |
| 29 | 44,067,234 | rs17872093 | 0.49119246  | 1.09484368 | 0.61056779 | 1.43528346 | 0.24952277 | 0.82128250 |
| 29 | 44,067,796 | rs17871984 | 9.12386593  | 4.17029373 | 6.17311920 | 1.38841165 | 0.33534977 | 1.65236722 |
| 29 | 44,068,143 | rs17870631 | 15.02478285 | 6.53020157 | 4.79267429 | 5.02153497 | 0.01743977 | 5.61780734 |
| 29 | 44,068,346 | rs17870628 | 8.02478258  | 3.72104979 | 5.03083483 | 1.69430079 | 0.23008326 | 2.29019068 |
| 29 | 44,068,445 | rs17870626 | 14.02591772 | 5.99882130 | 4.56681868 | 4.87245328 | 0.10332268 | 5.32147410 |
| 29 | 44,068,519 | rs17872010 | 13.92040678 | 6.23558901 | 4.32611748 | 5.02153497 | 0.01743977 | 5.22609254 |
| 29 | 44,068,580 | rs17872004 | 14.69756940 | 6.53020157 | 4.70900007 | 4.95672805 | 0.04699462 | 5.33363070 |
| 29 | 44,068,812 | rs17872003 | 14.52861819 | 6.54890094 | 4.68559191 | 5.23726316 | 0.05731284 | 5.26903465 |
| 29 | 44,069,063 | rs17812000 | 15.01318351 | 9.70325035 | 3.86955288 | 5.02153497 | 0.01743977 | 5.34387541 |
| 29 | 44,069,177 | rs17872006 | 12.16297032 | 6.95858004 | 3.95278603 | 3.63333825 | 0.20827835 | 4.93570623 |
| 29 | 44,070,713 | rs42192103 | 15.25158225 | 5.57498348 | 5.51973138 | 5.66567676 | 0.18467504 | 5.99674646 |
| 29 | 44,070,881 | rs42192105 | 3.44303003  | 1.04085226 | 3.19416028 | 0.16828075 | 0.05476708 | 0.95464665 |
| 29 | 44,071,034 | rs42192107 | 3.60877221  | 1.14058147 | 3.31494388 | 0.42816961 | 0.05476708 | 0.59604337 |
| 29 | 44,071,135 | rs42192108 | 0.84761227  | 0.11400826 | 0.24937838 | 0.31296813 | 1.21868023 | 0.05172524 |
| 29 | 44,071,593 | rs42192109 | 1.34891868  | 2.04739447 | 0.13589882 | 2.48998697 | 0.46197675 | 0.93864158 |
| 29 | 44,085,642 | rs17871051 | 5.52314725  | 6.47497947 | 0.90205454 | 1.69543379 | 0.89215774 | 2.61559871 |
| 29 | 44,085,769 | rs17871058 | 7.11609711  | 3.39328007 | 0.60316732 | 4.37345894 | 2.84572845 | 2.88941271 |
| 29 | 44,087,205 | rs17872032 | 4.07412817  | 2.69647902 | 0.11119448 | 2.27449768 | 0.61567777 | 2.27417512 |
| 29 | 44,087,356 | rs17872033 | 4.80268257  | 5.73921171 | 0.86225702 | 1.56598606 | 1.12117208 | 1.91960350 |
| 29 | 44,087,629 | rs17872050 | 7.27411721  | 3.95801125 | 0.58442547 | 4.49008758 | 3.23458930 | 2.59790176 |
| 29 | 44,087,858 | rs17872151 | 1.91592723  | 0.05811805 | 1.11957708 | 0.90851090 | 0.28340516 | 0.74334865 |

|                                                                                                                                                                                 |            |             |            |            |            |            |            |            |
|---------------------------------------------------------------------------------------------------------------------------------------------------------------------------------|------------|-------------|------------|------------|------------|------------|------------|------------|
| 29                                                                                                                                                                              | 44,088,897 | rs17870847  | 6.98857664 | 3.53198021 | 0.49906676 | 4.69114559 | 3.16712717 | 2.42102017 |
| 29                                                                                                                                                                              | 44,110,295 | rs42192119  | 0.24763846 | 0.11219104 | 0.09233846 | 0.61056832 | 0.36911136 | 0.14787609 |
| 29                                                                                                                                                                              | 44,119,671 | rs42195143  | 0.13149919 | 0.33349792 | 0.99637011 | 0.05862776 | 0.10126358 | 0.17576138 |
| 29                                                                                                                                                                              | 44,122,272 | rs42194216  | 0.44091580 | 0.18173824 | 0.76346807 | 0.27321828 | 0.10568910 | 0.00595621 |
| 29                                                                                                                                                                              | 44,125,747 | rs42194178  | 0.47074672 | 0.24535880 | 0.89696110 | 0.27137387 | 0.10568910 | 0.00595621 |
| 29                                                                                                                                                                              | 44,130,887 | rs42194132  | 0.34790036 | 0.24535880 | 0.80201702 | 0.27822368 | 0.10568910 | 0.14103651 |
| 29                                                                                                                                                                              | 44,154,126 | rs42193349  | 0.73134565 | 1.60354632 | 1.02285973 | 0.22531657 | 0.16005057 | 0.43020523 |
| 29                                                                                                                                                                              | 44,172,614 | ss117965984 | 0.89921288 | 0.00903521 | 0.79790059 | 0.48422659 | 0.20438421 | 0.83691045 |
| 29                                                                                                                                                                              | 44,196,154 | ss86318958  | 0.17826692 | 0.83275480 | 0.79139179 | 0.31733155 | 0.09584821 | 0.09352201 |
| 29                                                                                                                                                                              | 44,208,978 | rs29003633  | 0.72332983 | 4.82095682 | 0.01810898 | 0.13778251 | 0.05217681 | 0.29638830 |
| 29                                                                                                                                                                              | 44,223,148 | ss86323783  | 1.87225920 | 3.93233393 | 0.04523253 | 1.83618667 | 0.67743646 | 0.14198146 |
| 29                                                                                                                                                                              | 44,243,444 | ss86313099  | 0.08257010 | 1.92540086 | 1.69616348 | 0.95541644 | 0.08870579 | 0.24639965 |
| 29                                                                                                                                                                              | 44,325,408 | ss86292140  | 5.67467249 | 5.33541800 | 1.08931228 | 1.55484928 | 0.44966064 | 2.51916267 |
| 29                                                                                                                                                                              | 44,372,611 | ss86329852  | 0.53162591 | 0.02803790 | 0.48418639 | 1.23731403 | 0.80255075 | 0.90485283 |
| 29                                                                                                                                                                              | 44,395,075 | ss86333994  | 2.06219114 | 1.66817727 | 1.16265211 | 0.06130758 | 0.18184149 | 2.06865498 |
| 29                                                                                                                                                                              | 44,416,282 | rs43709648  | 5.68390548 | 4.77448860 | 4.22466506 | 1.33513815 | 0.06867912 | 0.52090920 |
| 29                                                                                                                                                                              | 44,546,564 | ss86288185  | 1.62442034 | 1.35229526 | 1.25855827 | 0.71522273 | 0.04494773 | 0.39605969 |
| 29                                                                                                                                                                              | 44,585,782 | ss86341172  | 0.93033545 | 0.89359393 | 0.51199420 | 1.19185100 | 0.31208265 | 0.27979050 |
| 29                                                                                                                                                                              | 44,628,137 | rs41600300  | 0.10219117 | 1.45782122 | 0.41298898 | 0.31552270 | 0.70959496 | 0.63515653 |
| 29                                                                                                                                                                              | 44,649,908 | ss86337530  | 0.04163328 | 0.09909412 | 1.09696773 | 0.27955691 | 0.09828177 | 0.87398116 |
| 29                                                                                                                                                                              | 44,740,917 | ss86334185  | 1.17528419 | 1.72921586 | 1.09441063 | 0.35244420 | 0.28055154 | 0.22148194 |
| 29                                                                                                                                                                              | 44,807,928 | ss117965824 | 0.24486922 | 1.68461918 | 1.22415017 | 0.02552680 | 0.03251072 | 0.15375166 |
| 29                                                                                                                                                                              | 44,853,970 | rs42192429  | 0.04285861 | 2.70896169 | 0.24443504 | 0.96548290 | 0.25802019 | 1.05292526 |
| 29                                                                                                                                                                              | 44,900,940 | rs43706228  | 1.16255448 | 4.47829875 | 0.12815280 | 2.96298435 | 0.05421330 | 0.16986484 |
| 29                                                                                                                                                                              | 44,969,518 | ss86337154  | 0.75559117 | 0.31551240 | 0.38456438 | 0.97456211 | 0.29136167 | 0.29457028 |
| 29                                                                                                                                                                              | 44,979,377 | ss86338214  | 0.16929778 | 0.41243332 | 0.34406199 | 0.23475380 | 0.09033549 | 0.48360841 |
| 29                                                                                                                                                                              | 44,999,264 | ss86310727  | 2.47136644 | 1.33314498 | 0.07862254 | 1.19352282 | 1.15758380 | 1.89272860 |
| 29                                                                                                                                                                              | 45,023,665 | ss86338763  | 0.50154984 | 0.31551240 | 1.02362911 | 0.82814950 | 0.29136167 | 0.22855959 |
| 29                                                                                                                                                                              | 45,102,557 | ss86332221  | 2.80208621 | 1.39414911 | 0.10735358 | 3.81708940 | 0.08121695 | 2.01548437 |
| 29                                                                                                                                                                              | 45,129,099 | ss86335405  | 1.92518407 | 1.91040532 | 0.55154806 | 1.87871179 | 0.10445101 | 0.35823047 |
| 29                                                                                                                                                                              | 45,187,114 | ss86295760  | 0.48656271 | 1.77102946 | 0.30303839 | 0.06520406 | 0.15318487 | 0.07669521 |
| 29                                                                                                                                                                              | 45,287,502 | ss86312485  | 1.47288059 | 1.04081145 | 0.13075897 | 2.75606820 | 0.42122552 | 0.08683296 |
| 29                                                                                                                                                                              | 45,326,585 | rs42198683  | 0.17928117 | 0.34149476 | 0.64650443 | 1.93008045 | 0.09554951 | 0.37980161 |
| 29                                                                                                                                                                              | 45,367,095 | ss86322638  | 0.41840731 | 0.41923223 | 1.08477513 | 0.17936027 | 0.38174958 | 0.67379779 |
| 29                                                                                                                                                                              | 45,458,280 | rs43706176  | 0.31849023 | 1.14656944 | 0.18898358 | 0.07227556 | 0.27896857 | 0.00510871 |
| 29                                                                                                                                                                              | 45,482,143 | rs29025626  | 1.37928192 | 3.32818270 | 0.04864044 | 0.38112107 | 1.95322650 | 0.38976296 |
| 29                                                                                                                                                                              | 45,530,264 | ss86341375  | 0.25925427 | 0.17470233 | 0.04224125 | 0.01600602 | 0.49028244 | 0.80895685 |
| <sup>1</sup> UMD3.1 Coordinates. SNPs located within <i>CAST</i> and <i>CAPN1</i> are shaded in yellow.                                                                         |            |             |            |            |            |            |            |            |
| <sup>2</sup> Commercialized SNPs are shaded in red.                                                                                                                             |            |             |            |            |            |            |            |            |
| <sup>3</sup> GBLUP allele substitution effect ( $\alpha$ ) ranks. Values less than 500 are shaded in yellow for the across-breed and green for the within-breed.                |            |             |            |            |            |            |            |            |
| <sup>4</sup> GBLUP of SNP allele substitution effects ( $\alpha$ ) estimated as a random effect.                                                                                |            |             |            |            |            |            |            |            |
| <sup>5</sup> SNP allele substitution effects ( $\beta$ ) estimated as fixed effects in a mixed linear model including the genomic relationship matrix.                          |            |             |            |            |            |            |            |            |
| <sup>6</sup> $-\log_{10}(P)$ -value for the test of the null hypothesis of an allele substitution effect ( $\beta$ ) of zero. Maximum values are shaded in red.                 |            |             |            |            |            |            |            |            |
| <sup>7</sup> $-\log_{10}(P)$ -value for the test of the null hypothesis of all haplotype substitution effects ( $H$ ) being zero. Maximum values are shaded in green.           |            |             |            |            |            |            |            |            |
| <sup>8</sup> Number of haplotypes and effective number of haplotypes in parentheses for the 13 ( <i>CAST</i> ) or 31 ( <i>CAPN1</i> ) SNP block centered on the identified SNP. |            |             |            |            |            |            |            |            |
| <sup>9</sup> Number Percentage of phenotypic variation in WBSF explained by haplotypes centered on the identified SNP.                                                          |            |             |            |            |            |            |            |            |

|     |                  |                     |              |            |            |             | $-\log_{10}(P)HSE^7$ |             |
|-----|------------------|---------------------|--------------|------------|------------|-------------|----------------------|-------------|
| BTA | POS <sup>1</sup> | SNP ID <sup>2</sup> | H-All Breeds | H-Angus    | H-Hereford | H-Charolais | H-Limousin           | H-Simmental |
| 7   | 97,151,592       | rs41656985          |              |            |            |             |                      |             |
| 7   | 97,261,052       | rs41656987          |              |            |            |             |                      |             |
| 7   | 97,372,656       | rs41570922          |              |            |            |             |                      |             |
| 7   | 97,393,157       | rs41615915          |              |            |            |             |                      |             |
| 7   | 97,430,691       | ss86295638          | 0.26508076   | 0.22716139 | 0.35490286 | 0.11939695  | 1.17950014           | 0.05611460  |
| 7   | 97,501,859       | ss86310801          | 0.81800928   | 0.07156966 | 0.33609847 | 0.06345397  | 2.15235804           | 0.09168065  |
| 7   | 97,529,872       | ss61472319          | 1.98049919   | 0.14371942 | 1.39259947 | 0.12678032  | 1.29152534           | 0.15902671  |
| 7   | 97,691,853       | ss86290016          | 1.38106720   | 0.03262946 | 1.44345770 | 0.06604644  | 1.08465456           | 0.00273854  |
| 7   | 97,772,240       | ss86312419          | 1.11696273   | 0.03704186 | 0.59346134 | 0.01414687  | 1.48842612           | 0.51559835  |
| 7   | 97,861,341       | rs41593284          | 1.07333880   | 0.18884830 | 1.54612811 | 1.28697105  | 1.94622343           | 0.70741950  |
| 7   | 97,898,940       | rs41593281          | 1.20710768   | 0.21395773 | 0.35285888 | 0.56983555  | 0.84014096           | 0.97571611  |
| 7   | 97,961,659       | ss117969141         | 1.56513141   | 0.58260066 | 1.18631024 | 0.80927320  | 1.45814808           | 0.69798479  |
| 7   | 98,013,150       | ss117968909         | 1.94109221   | 0.42866082 | 1.70014361 | 1.07709074  | 1.53017736           | 0.54579568  |
| 7   | 98,173,299       | ss86290989          | 5.19485373   | 0.21666189 | 3.08995548 | 0.57537080  | 0.40169634           | 1.26846310  |
| 7   | 98,194,828       | rs41658549          | 7.19312845   | 1.45022845 | 3.28674164 | 0.88346307  | 0.94186821           | 1.09107705  |
| 7   | 98,254,815       | rs41658542          | 7.30762392   | 1.20874235 | 3.86521461 | 0.64348316  | 1.16137417           | 1.44864297  |
| 7   | 98,375,640       | ss86329349          | 5.20735013   | 0.69984802 | 3.62626557 | 0.21261409  | 0.99651092           | 1.49969468  |
| 7   | 98,495,888       | rs43529872          | 8.78946851   | 2.75028009 | 3.88742490 | 3.77219492  | 1.18671624           | 0.67066205  |
| 7   | 98,498,047       | ss86321563          | 5.26395768   | 0.95003489 | 3.26823256 | 1.24059094  | 0.59144138           | 0.50885778  |
| 7   | 98,538,952       | rs41660170          | 5.75844597   | 1.24611419 | 4.18746267 | 4.02764991  | 0.34395397           | 1.25539145  |
| 7   | 98,566,391       | ss117962527         | 5.29372661   | 0.80510588 | 4.56286232 | 2.37126445  | 0.89744762           | 0.24031325  |
| 7   | 98,579,574       | rs41255587          | 3.98897683   | 0.52039442 | 3.44498563 | 2.02857191  | 0.63931022           | 0.40299644  |
| 7   | 98,635,208       | ss86300200          | 2.32088832   | 0.36484788 | 3.13453957 | 1.47339982  | 1.97169891           | 0.04134551  |
| 7   | 98,646,770       | rs41596489          | 3.35672116   | 0.12551053 | 2.35292792 | 0.83513958  | 0.61692184           | 0.74500295  |
| 7   | 98,680,293       | ss86315737          | 1.46829182   | 0.45527887 | 1.11997405 | 0.72275624  | 1.52410372           | 0.77676452  |
| 7   | 98,726,055       | rs29018251          | 2.68450826   | 0.00446483 | 2.59819051 | 1.64736930  | 0.04882888           | 1.21792070  |
| 7   | 98,757,265       | ss86303738          | 0.25145766   | 0.01037767 | 1.07605607 | 0.11879893  | 0.05675627           | 0.52793539  |
| 7   | 98,820,742       | ss86324113          | 1.27277626   | 0.00316008 | 0.87855733 | 0.82996525  | 0.16650701           | 0.07170139  |
| 7   | 98,887,313       | rs41568595          | 1.04874555   | 0.24055696 | 1.92106638 | 2.27907223  | 0.25832342           | 0.34138781  |
| 7   | 98,907,404       | ss86291843          | 0.12659421   | 0.04140937 | 0.47312626 | 1.08738269  | 0.30143055           | 0.17518428  |
| 7   | 98,974,456       | ss86339659          | 0.35618278   | 0.11996119 | 0.43000780 | 3.20102208  | 1.59395272           | 0.16889318  |
| 7   | 99,024,444       | ss117968912         | 1.38169398   | 0.46449100 | 2.42800812 | 3.82249522  | 0.33963017           | 0.03566803  |
| 7   | 99,085,299       | rs41590403          | 1.41246704   | 0.22315877 | 2.07804148 | 1.22225322  | 0.25108351           | 0.12469519  |
| 7   | 99,130,598       | ss86333606          | 0.46025697   | 0.00984278 | 1.09712190 | 0.87025315  | 0.99486135           | 0.02418621  |
| 7   | 99,178,748       | rs41568774          | 0.27207244   | 0.07530685 | 0.40169694 | 1.03480593  | 0.17213830           | 0.08893838  |
| 7   | 99,215,474       | ss86324013          | 1.54040285   | 0.23635459 | 1.69528036 | 0.45088169  | 0.01317582           | 0.20992227  |
| 7   | 99,344,820       | rs41622872          | 0.77418023   | 1.10702407 | 0.64002365 | 0.03192407  | 0.45514191           | 0.44536115  |
| 7   | 99,399,852       | ss117968895         | 0.02699322   | 0.01194669 | 0.05783008 | 0.01770490  | 0.62311139           | 0.00584030  |
| 7   | 99,492,904       | ss86296856          | 0.67099476   | 0.03420171 | 0.23136372 | 0.31714738  | 0.56405439           | 0.21482810  |
| 7   | 99,635,841       | ss86339853          | 0.26382175   | 0.06423947 | 0.07232531 | 0.24511858  | 1.09094161           | 0.22922627  |
| 7   | 99,687,614       | rs41657025          |              |            |            |             |                      |             |
| 7   | 99,845,133       | rs41624339          |              |            |            |             |                      |             |
| 7   | 99,919,908       | ss86339607          |              |            |            |             |                      |             |
| 7   | 100,015,468      | ss86310226          |              |            |            |             |                      |             |
| 29  | 42,406,544       | ss86319674          |              |            |            |             |                      |             |
| 29  | 42,455,680       | ss117974470         |              |            |            |             |                      |             |
| 29  | 42,620,218       | rs42189770          |              |            |            |             |                      |             |
| 29  | 42,651,294       | rs43706142          |              |            |            |             |                      |             |
| 29  | 42,696,595       | rs42189112          | 0.30906697   | 0.88607575 | 0.02123152 | 0.39494132  | 0.15097430           | 0.23355190  |
| 29  | 42,749,808       | rs29020063          | 0.60218769   | 0.98996223 | 0.03249730 | 0.59290246  | 0.34019608           | 1.19943101  |
| 29  | 42,842,353       | ss117974486         | 1.13550193   | 0.65699706 | 0.47372237 | 0.02181479  | 0.08405313           | 1.12277303  |
| 29  | 42,897,144       | ss86322358          | 0.71512224   | 2.11448646 | 0.53312529 | 0.14369412  | 0.21209756           | 0.88613922  |

|    |            |            |             |            |            |            |            |            |
|----|------------|------------|-------------|------------|------------|------------|------------|------------|
| 29 | 43,006,000 | ss86339964 | 0.73271265  | 2.41188485 | 0.33960364 | 0.08529153 | 0.77321440 | 1.56473566 |
| 29 | 43,043,207 | ss86341572 | 0.82246094  | 2.32985985 | 0.11124371 | 0.09751926 | 0.15356810 | 1.43976778 |
| 29 | 43,108,445 | ss86337140 | 0.81896949  | 2.33109058 | 0.00285613 | 0.00222270 | 0.18021498 | 1.69495979 |
| 29 | 43,129,250 | ss86337549 | 1.63994035  | 4.20422145 | 0.06100995 | 0.16876456 | 0.03220266 | 0.93963329 |
| 29 | 43,189,370 | ss86319044 | 1.18301713  | 1.19782548 | 0.86122390 | 0.01091282 | 0.23608231 | 0.49359785 |
| 29 | 43,224,753 | rs29013208 | 2.37813436  | 3.18593611 | 1.67880213 | 0.01106032 | 0.11811475 | 0.61501851 |
| 29 | 43,269,744 | ss86282762 | 3.86475938  | 3.82149385 | 2.26416192 | 0.14418999 | 0.55321311 | 0.92959597 |
| 29 | 43,304,256 | rs29024708 | 1.24577534  | 1.55404902 | 0.83388990 | 0.16568222 | 0.13932080 | 1.35982228 |
| 29 | 43,328,607 | ss86295061 | 1.62487690  | 2.40837626 | 0.42667436 | 1.64421339 | 0.02121940 | 1.33710261 |
| 29 | 43,429,511 | ss86318094 | 2.12572529  | 3.80842344 | 1.28881993 | 0.95480642 | 0.02553625 | 1.44611500 |
| 29 | 43,466,342 | ss86310741 | 0.71555522  | 1.12116750 | 0.88703677 | 0.33284474 | 0.00270686 | 0.56692846 |
| 29 | 43,498,073 | ss86338800 | 1.45812150  | 2.95862003 | 0.90383764 | 0.85347409 | 0.41198322 | 0.31775444 |
| 29 | 43,611,640 | ss86298040 | 1.71738830  | 1.49905151 | 0.65021301 | 0.56840134 | 0.58927359 | 0.81617442 |
| 29 | 43,652,252 | ss86327310 | 1.85247447  | 2.72293599 | 0.38704847 | 1.21836700 | 0.46366774 | 1.06027271 |
| 29 | 43,686,401 | ss86325323 | 2.85471722  | 5.50057900 | 0.89673711 | 1.10064931 | 0.00287942 | 2.04317052 |
| 29 | 43,709,769 | ss86290081 | 2.37660557  | 7.30961397 | 0.69453568 | 0.90919636 | 0.76372755 | 2.56351112 |
| 29 | 43,747,765 | rs42190085 | 1.57659695  | 2.45959885 | 0.82975654 | 0.08757620 | 0.69431647 | 2.26028050 |
| 29 | 43,749,527 | ss86299346 | 1.17290269  | 1.12334737 | 0.87827269 | 0.58774448 | 0.69851826 | 1.38948401 |
| 29 | 43,777,249 | ss86299989 | 3.02787309  | 1.34862602 | 1.70160346 | 0.33254679 | 1.47845730 | 1.58800258 |
| 29 | 43,826,144 | rs42191289 | 5.32853039  | 1.18426692 | 3.31864667 | 0.80798556 | 0.11909686 | 1.37750458 |
| 29 | 43,839,783 | ss86336460 | 0.34757971  | 1.24877665 | 0.88353443 | 0.25582816 | 0.10286128 | 0.42109271 |
| 29 | 43,914,923 | ss86335514 | 0.41546339  | 0.90700286 | 0.13421452 | 0.59111298 | 0.14605836 | 0.88599779 |
| 29 | 44,000,728 | rs42191319 | 0.82185269  | 0.04755089 | 0.49823042 | 0.84353654 | 0.13510732 | 0.83505751 |
| 29 | 44,029,526 | rs42192038 | 0.50880964  | 0.31129890 | 0.27972788 | 0.86600833 | 0.26925594 | 0.44131506 |
| 29 | 44,042,363 | rs42192064 | 0.13658017  | 0.11580871 | 0.72905363 | 0.71583709 | 0.01905937 | 0.08194063 |
| 29 | 44,049,244 | rs42192077 | 1.35767164  | 1.22634702 | 0.85886097 | 1.46652883 | 0.02509769 | 0.70198908 |
| 29 | 44,050,471 | ss86284058 | 1.61646995  | 1.67349815 | 0.67683014 | 0.48665107 | 0.28414395 | 1.97858819 |
| 29 | 44,051,567 | rs42192079 | 3.30712727  | 1.42085559 | 2.44795993 | 0.82580793 | 0.00975328 | 2.86690989 |
| 29 | 44,053,733 | rs42192083 | 3.39158339  | 2.38296426 | 1.30292318 | 0.94212815 | 0.21402334 | 3.00111352 |
| 29 | 44,054,901 | rs42192084 | 11.49369842 | 3.55621855 | 5.21648679 | 3.10996361 | 0.23084442 | 1.99917782 |
| 29 | 44,058,688 | rs42192090 | 7.88594584  | 1.80903613 | 5.70470916 | 3.31341794 | 0.09513478 | 2.83102329 |
| 29 | 44,060,410 | rs42192096 | 0.12986183  | 1.46336669 | 2.16083744 | 1.23070016 | 0.45062150 | 0.15558495 |
| 29 | 44,062,694 | rs42192100 | 12.27238874 | 2.41838262 | 6.74301670 | 1.67412867 | 0.48273454 | 1.60991865 |
| 29 | 44,063,938 | rs17872078 | 12.23589788 | 2.29047402 | 5.87511925 | 2.49050918 | 0.10200335 | 2.19095222 |
| 29 | 44,067,234 | rs17872093 | 16.88269453 | 6.57015459 | 5.61324508 | 3.26121021 | 0.26036723 | 4.51981527 |
| 29 | 44,067,796 | rs17871984 | 18.42738682 | 5.84412338 | 5.71691132 | 4.08482900 | 0.27637483 | 4.20909177 |
| 29 | 44,068,143 | rs17870631 | 18.39968289 | 6.37524252 | 5.45793276 | 4.05568887 | 0.23002304 | 4.03478613 |
| 29 | 44,068,346 | rs17870628 | 12.38241270 | 5.04806672 | 2.70913095 | 4.10912997 | 0.24068611 | 2.93239801 |
| 29 | 44,068,445 | rs17870626 | 13.82885695 | 9.34358563 | 3.53168518 | 4.15858213 | 0.32596470 | 3.28779936 |
| 29 | 44,068,519 | rs17872010 | 15.25910115 | 9.89889309 | 5.93905737 | 4.63045660 | 1.24106440 | 3.82501971 |
| 29 | 44,068,580 | rs17872004 | 6.47969623  | 5.68172394 | 3.81874178 | 0.49614568 | 0.25001902 | 1.82874448 |
| 29 | 44,068,812 | rs17872003 | 2.05963582  | 2.46398596 | 1.24572801 | 1.47993935 | 0.15068095 | 0.56014166 |
| 29 | 44,069,063 | rs17812000 | 9.77853894  | 7.47435434 | 2.39643816 | 2.79419971 | 0.12049838 | 3.66924718 |
| 29 | 44,069,177 | rs17872006 | 13.46353251 | 7.96050207 | 3.86770851 | 4.29375576 | 0.88025979 | 3.88562500 |
| 29 | 44,070,713 | rs42192103 | 11.55151331 | 6.44427023 | 4.27234495 | 4.12354576 | 0.95747805 | 2.99347063 |
| 29 | 44,070,881 | rs42192105 | 13.20467660 | 6.97082267 | 4.74847929 | 5.85379933 | 1.34839067 | 2.63128615 |
| 29 | 44,071,034 | rs42192107 | 12.98510976 | 6.43286369 | 4.17187350 | 5.64602414 | 0.28760212 | 2.92776017 |
| 29 | 44,071,135 | rs42192108 | 2.37657109  | 2.85669709 | 1.57339654 | 0.99186327 | 0.28553372 | 0.51775051 |
| 29 | 44,071,593 | rs42192109 | 2.43465244  | 2.35156168 | 1.72365835 | 1.06696035 | 0.56643274 | 0.11445303 |
| 29 | 44,085,642 | rs17871051 | 2.22122719  | 3.74051691 | 0.20554006 | 3.10807112 | 0.97276859 | 2.13239684 |
| 29 | 44,085,769 | rs17871058 | 6.61208861  | 8.38064456 | 3.00878845 | 3.07580730 | 1.26456466 | 2.23802562 |
| 29 | 44,087,205 | rs17872032 | 6.40228903  | 7.70690103 | 1.37392140 | 1.67479791 | 1.32025609 | 2.25287170 |
| 29 | 44,087,356 | rs17872033 | 2.71654734  | 2.41023275 | 0.82639683 | 0.30604784 | 1.49210014 | 0.98590337 |
| 29 | 44,087,629 | rs17872050 | 2.98168563  | 1.19410286 | 1.05055383 | 1.77522158 | 0.83669683 | 1.28942592 |
| 29 | 44,087,858 | rs17872151 | 1.93894476  | 1.14413413 | 1.96526756 | 0.39565199 | 0.29177155 | 0.62766408 |

|    |            |             |            |            |            |            |            |            |
|----|------------|-------------|------------|------------|------------|------------|------------|------------|
| 29 | 44,088,897 | rs17870847  | 0.16133199 | 0.79403792 | 0.21583410 | 0.49005619 | 0.02166887 | 0.00111337 |
| 29 | 44,110,295 | rs42192119  | 1.60735942 | 0.87925948 | 0.21436998 | 1.12419681 | 0.03163904 | 1.06791215 |
| 29 | 44,119,671 | rs42195143  | 1.22792288 | 0.54340136 | 0.97473257 | 0.20362366 | 0.10037664 | 0.29155327 |
| 29 | 44,122,272 | rs42194216  | 2.51318370 | 0.47540070 | 1.04175576 | 2.70682242 | 0.14208366 | 1.16366448 |
| 29 | 44,125,747 | rs42194178  | 2.23965847 | 0.35775641 | 0.18928124 | 2.96180470 | 0.07248796 | 1.32894979 |
| 29 | 44,130,887 | rs42194132  | 1.81890816 | 0.46168104 | 0.39822265 | 1.67786057 | 0.29121497 | 1.17182571 |
| 29 | 44,154,126 | rs42193349  | 0.65076323 | 3.31740232 | 0.02064049 | 0.26745156 | 0.31157124 | 0.36263333 |
| 29 | 44,172,614 | ss117965984 | 0.23199661 | 3.28778318 | 1.02199034 | 2.44002739 | 0.05228876 | 0.36745166 |
| 29 | 44,196,154 | ss86318958  | 1.81161647 | 1.75877838 | 2.16745327 | 0.19969184 | 0.01874044 | 1.57245625 |
| 29 | 44,208,978 | rs29003633  | 1.87290255 | 3.00026737 | 0.70748339 | 0.12248651 | 0.01088652 | 1.10235697 |
| 29 | 44,223,148 | ss86323783  | 1.54925700 | 0.56620010 | 2.55633328 | 0.59153503 | 0.02959121 | 1.37000248 |
| 29 | 44,243,444 | ss86313099  | 1.65698290 | 0.89625423 | 2.40467619 | 0.64371127 | 0.20064084 | 0.76500188 |
| 29 | 44,325,408 | ss86292140  | 6.82799864 | 1.97015854 | 3.23951326 | 2.38246215 | 0.32381463 | 0.80251350 |
| 29 | 44,372,611 | ss86329852  | 1.44683209 | 0.19968322 | 2.94240217 | 0.12341834 | 0.54213787 | 0.50892430 |
| 29 | 44,395,075 | ss86333994  | 1.43940004 | 0.57500362 | 2.98266063 | 0.19138583 | 0.46385971 | 0.49592585 |
| 29 | 44,416,282 | rs43709648  | 1.56049570 | 2.54501513 | 1.06492009 | 0.63239930 | 0.01669722 | 0.90088312 |
| 29 | 44,546,564 | ss86288185  | 5.32381518 | 3.01422973 | 3.84893761 | 0.53942642 | 0.00462038 | 1.36466524 |
| 29 | 44,585,782 | ss86341172  | 2.46757085 | 1.31429916 | 0.75921234 | 0.64833951 | 0.01279982 | 0.53388457 |
| 29 | 44,628,137 | rs41600300  | 0.59487472 | 2.14009510 | 0.49302374 | 0.15268886 | 0.55836508 | 0.91422243 |
| 29 | 44,649,908 | ss86337530  | 1.01897824 | 1.15277044 | 0.96862457 | 1.32901788 | 0.30646495 | 1.12382422 |
| 29 | 44,740,917 | ss86334185  | 0.48680305 | 2.69382778 | 0.26618189 | 0.25735165 | 0.12919985 | 0.70970398 |
| 29 | 44,807,928 | ss117965824 | 2.15392065 | 3.50921540 | 0.05121356 | 2.63424357 | 0.08061088 | 0.55089100 |
| 29 | 44,853,970 | rs42192429  | 2.31724705 | 5.76063374 | 0.77973760 | 0.17127986 | 0.80095841 | 0.88638095 |
| 29 | 44,900,940 | rs43706228  | 2.19610799 | 3.93534502 | 1.11862283 | 0.39006681 | 0.76834606 | 0.28628755 |
| 29 | 44,969,518 | ss86337154  | 1.94685789 | 5.32150326 | 0.59049892 | 1.21396124 | 0.34880684 | 0.04453270 |
| 29 | 44,979,377 | ss86338214  | 0.62499693 | 1.76815948 | 0.83021256 | 0.35757153 | 0.24917828 | 0.37576807 |
| 29 | 44,999,264 | ss86310727  | 0.58311707 | 0.05002567 | 0.40984010 | 1.24270857 | 0.16974211 | 0.20788783 |
| 29 | 45,023,665 | ss86338763  | 1.10742450 | 2.82842226 | 0.54096063 | 3.35054933 | 0.06487693 | 0.47992127 |
| 29 | 45,102,557 | ss86332221  | 0.70729646 | 1.30554383 | 0.40632859 | 3.33952068 | 0.20370789 | 0.65698242 |
| 29 | 45,129,099 | ss86335405  | 0.08011029 | 0.56628152 | 0.17913265 | 1.47136413 | 0.10457292 | 0.03010530 |
| 29 | 45,187,114 | ss86295760  | 3.90874839 | 0.47612537 | 3.19993420 | 1.36504297 | 0.10578806 | 0.13928507 |
| 29 | 45,287,502 | ss86312485  | 1.62763739 | 2.77694631 | 2.25493961 | 0.77715979 | 0.15892100 | 0.81196521 |
| 29 | 45,326,585 | rs42198683  | 1.84232573 | 2.43676900 | 2.15095695 | 1.04701284 | 0.35084659 | 0.49732541 |
| 29 | 45,367,095 | ss86322638  |            |            |            |            |            |            |
| 29 | 45,458,280 | rs43706176  |            |            |            |            |            |            |
| 29 | 45,482,143 | rs29025626  |            |            |            |            |            |            |
| 29 | 45,530,264 | ss86341375  |            |            |            |            |            |            |

<sup>1</sup>UMD3.1 Coordinates. SNPs located within *CAST* and *CAPN1* are shaded in yellow.

<sup>2</sup>Commercialized SNPs are shaded in red.

<sup>3</sup>GBLUP allele substitution effect ( $\alpha$ ) ranks. Values less than 500 are shaded in yellow for the across-breed and green for the within-breed.

<sup>4</sup>GBLUP of SNP allele substitution effects ( $\alpha$ ) estimated as a random effect.

<sup>5</sup>SNP allele substitution effects ( $\beta$ ) estimated as fixed effects in a mixed linear model including the genomic relationship matrix.

<sup>6</sup> $-\log_{10}(P)$ -value for the test of the null hypothesis of an allele substitution effect ( $\beta$ ) of zero. Maximum values are shaded in red.

<sup>7</sup> $-\log_{10}(P)$ -value for the test of the null hypothesis of all haplotype substitution effects ( $H$ ) being zero. Maximum values are shaded in red.

<sup>8</sup>Number of haplotypes and effective number of haplotypes in parentheses for the 13 (*CAST*) or 31 (*CAPN1*) SNP block centered on the identified SNP.

<sup>9</sup>Number Percentage of phenotypic variation in WBSF explained by haplotypes centered on the identified SNP.

|     |                  |                     |            |          |          | No. Haplotypes <sup>8</sup> |          |           |
|-----|------------------|---------------------|------------|----------|----------|-----------------------------|----------|-----------|
| BTA | POS <sup>1</sup> | SNP ID <sup>2</sup> | All Breeds | Angus    | Hereford | Charolais                   | Limousin | Simmental |
| 7   | 97,151,592       | rs41656985          |            |          |          |                             |          |           |
| 7   | 97,261,052       | rs41656987          |            |          |          |                             |          |           |
| 7   | 97,372,656       | rs41570922          |            |          |          |                             |          |           |
| 7   | 97,393,157       | rs41615915          |            |          |          |                             |          |           |
| 7   | 97,430,691       | ss86295638          | 8 (2.97)   | 8 (2.20) | 6 (2.65) | 8 (3.79)                    | 7 (3.73) | 8 (2.67)  |
| 7   | 97,501,859       | ss86310801          | 8 (3.65)   | 8 (3.13) | 6 (2.76) | 8 (4.47)                    | 6 (4.83) | 7 (3.52)  |
| 7   | 97,529,872       | ss61472319          | 8 (3.73)   | 8 (3.05) | 7 (3.00) | 7 (3.84)                    | 7 (4.44) | 8 (3.78)  |
| 7   | 97,691,853       | ss86290016          | 7 (3.89)   | 7 (3.07) | 6 (2.99) | 7 (4.04)                    | 7 (4.55) | 7 (4.19)  |
| 7   | 97,772,240       | ss86312419          | 7 (3.57)   | 7 (2.77) | 7 (2.85) | 7 (4.57)                    | 7 (4.61) | 7 (3.72)  |
| 7   | 97,861,341       | rs41593284          | 7 (3.04)   | 7 (2.07) | 6 (2.42) | 7 (3.99)                    | 7 (5.29) | 7 (3.18)  |
| 7   | 97,898,940       | rs41593281          | 6 (3.46)   | 6 (2.90) | 6 (2.45) | 6 (4.16)                    | 6 (4.23) | 6 (4.06)  |
| 7   | 97,961,659       | ss117969141         | 6 (3.22)   | 6 (3.22) | 5 (1.95) | 6 (3.62)                    | 6 (3.74) | 6 (4.00)  |
| 7   | 98,013,150       | ss117968909         | 7 (3.41)   | 6 (3.31) | 5 (2.07) | 7 (4.01)                    | 6 (3.86) | 6 (4.13)  |
| 7   | 98,173,299       | ss86290989          | 8 (4.77)   | 6 (3.82) | 7 (3.56) | 7 (4.07)                    | 6 (4.22) | 8 (4.02)  |
| 7   | 98,194,828       | rs41658549          | 8 (4.43)   | 6 (3.27) | 7 (3.54) | 6 (3.95)                    | 6 (3.97) | 8 (3.53)  |
| 7   | 98,254,815       | rs41658542          | 8 (4.34)   | 7 (3.52) | 7 (3.42) | 6 (4.03)                    | 7 (4.29) | 8 (3.65)  |
| 7   | 98,375,640       | ss86329349          | 8 (4.18)   | 7 (3.20) | 7 (3.63) | 7 (3.42)                    | 7 (3.84) | 8 (3.60)  |
| 7   | 98,495,888       | rs43529872          | 9 (4.21)   | 8 (3.39) | 8 (3.34) | 7 (3.38)                    | 8 (3.95) | 9 (3.46)  |
| 7   | 98,498,047       | ss86321563          | 9 (5.03)   | 8 (3.93) | 8 (3.79) | 8 (4.01)                    | 8 (4.51) | 9 (3.92)  |
| 7   | 98,538,952       | rs41660170          | 8 (4.20)   | 8 (3.58) | 7 (2.97) | 8 (3.90)                    | 7 (3.46) | 8 (4.00)  |
| 7   | 98,566,391       | ss117962527         | 8 (3.78)   | 8 (3.22) | 6 (2.79) | 7 (3.61)                    | 6 (3.01) | 7 (4.49)  |
| 7   | 98,579,574       | rs41255587          | 8 (4.10)   | 8 (2.92) | 6 (3.20) | 7 (3.98)                    | 6 (3.23) | 7 (4.40)  |
| 7   | 98,635,208       | ss86300200          | 8 (3.25)   | 8 (3.00) | 6 (2.70) | 7 (3.35)                    | 6 (2.89) | 7 (3.34)  |
| 7   | 98,646,770       | rs41596489          | 9 (3.46)   | 9 (3.75) | 6 (2.50) | 7 (4.01)                    | 6 (3.07) | 7 (3.17)  |
| 7   | 98,680,293       | ss86315737          | 8 (3.54)   | 8 (3.48) | 6 (2.82) | 7 (4.08)                    | 7 (3.31) | 7 (3.38)  |
| 7   | 98,726,055       | rs29018251          | 8 (3.54)   | 7 (3.63) | 7 (2.66) | 7 (3.66)                    | 7 (3.73) | 8 (3.41)  |
| 7   | 98,757,265       | ss86303738          | 7 (3.38)   | 6 (4.02) | 5 (2.52) | 7 (3.81)                    | 6 (3.12) | 7 (3.29)  |
| 7   | 98,820,742       | ss86324113          | 7 (4.01)   | 7 (3.97) | 7 (2.93) | 6 (3.86)                    | 6 (3.56) | 7 (3.45)  |
| 7   | 98,887,313       | rs41568595          | 8 (4.84)   | 7 (4.79) | 7 (4.12) | 7 (4.98)                    | 7 (3.89) | 8 (4.53)  |
| 7   | 98,907,404       | ss86291843          | 7 (4.35)   | 6 (3.78) | 6 (3.51) | 7 (4.39)                    | 7 (3.50) | 7 (4.70)  |
| 7   | 98,974,456       | ss86339659          | 7 (3.79)   | 7 (3.93) | 7 (3.15) | 7 (4.04)                    | 7 (2.91) | 7 (3.89)  |
| 7   | 99,024,444       | ss117968912         | 7 (3.58)   | 7 (3.19) | 6 (3.30) | 7 (3.37)                    | 6 (3.41) | 6 (3.47)  |
| 7   | 99,085,299       | rs41590403          | 7 (3.97)   | 6 (3.54) | 6 (3.77) | 6 (3.61)                    | 6 (3.06) | 7 (4.21)  |
| 7   | 99,130,598       | ss86333606          | 7 (3.89)   | 6 (3.51) | 6 (3.62) | 6 (3.70)                    | 6 (3.64) | 7 (4.08)  |
| 7   | 99,178,748       | rs41568774          | 9 (4.42)   | 7 (4.37) | 6 (3.60) | 6 (3.92)                    | 6 (3.95) | 8 (4.52)  |
| 7   | 99,215,474       | ss86324013          | 9 (4.14)   | 7 (4.41) | 8 (3.25) | 7 (4.05)                    | 7 (3.59) | 9 (4.71)  |
| 7   | 99,344,820       | rs41622872          | 8 (3.77)   | 6 (4.34) | 8 (2.69) | 7 (3.64)                    | 7 (3.45) | 8 (4.05)  |
| 7   | 99,399,852       | ss117968895         | 9 (3.71)   | 7 (3.58) | 8 (3.08) | 6 (3.31)                    | 7 (3.36) | 7 (4.11)  |
| 7   | 99,492,904       | ss86296856          | 8 (4.87)   | 7 (4.59) | 7 (3.06) | 6 (4.06)                    | 7 (3.43) | 7 (4.87)  |
| 7   | 99,635,841       | ss86339853          | 9 (4.28)   | 7 (4.79) | 7 (2.39) | 7 (4.52)                    | 8 (3.65) | 7 (4.39)  |
| 7   | 99,687,614       | rs41657025          |            |          |          |                             |          |           |
| 7   | 99,845,133       | rs41624339          |            |          |          |                             |          |           |
| 7   | 99,919,908       | ss86339607          |            |          |          |                             |          |           |
| 7   | 100,015,468      | ss86310226          |            |          |          |                             |          |           |
| 29  | 42,406,544       | ss86319674          |            |          |          |                             |          |           |
| 29  | 42,455,680       | ss117974470         |            |          |          |                             |          |           |
| 29  | 42,620,218       | rs42189770          |            |          |          |                             |          |           |
| 29  | 42,651,294       | rs43706142          |            |          |          |                             |          |           |
| 29  | 42,696,595       | rs42189112          | 7 (3.96)   | 7 (3.83) | 7 (3.14) | 7 (3.75)                    | 7 (4.05) | 7 (3.91)  |
| 29  | 42,749,808       | rs29020063          | 8 (5.15)   | 8 (4.64) | 8 (4.10) | 8 (4.93)                    | 8 (4.67) | 8 (5.59)  |
| 29  | 42,842,353       | ss117974486         | 9 (4.30)   | 8 (3.29) | 9 (4.15) | 8 (3.99)                    | 8 (4.62) | 9 (4.81)  |
| 29  | 42,897,144       | ss86322358          | 9 (4.91)   | 9 (3.94) | 9 (3.93) | 9 (4.52)                    | 9 (5.42) | 9 (4.80)  |



|    |            |            |           |          |          |          |          |           |
|----|------------|------------|-----------|----------|----------|----------|----------|-----------|
| 29 | 43,006,000 | ss86339964 | 10 (3.56) | 9 (3.28) | 9 (3.08) | 9 (2.93) | 9 (5.55) | 10 (4.31) |
| 29 | 43,043,207 | ss86341572 | 9 (3.80)  | 8 (3.87) | 8 (2.50) | 8 (3.66) | 8 (4.67) | 9 (4.61)  |
| 29 | 43,108,445 | ss86337140 | 10 (2.88) | 7 (2.57) | 7 (2.26) | 7 (2.72) | 7 (4.72) | 10 (3.45) |
| 29 | 43,129,250 | ss86337549 | 9 (2.36)  | 7 (2.21) | 7 (1.92) | 7 (2.38) | 6 (3.65) | 9 (2.67)  |
| 29 | 43,189,370 | ss86319044 | 8 (2.25)  | 7 (2.21) | 7 (1.63) | 7 (2.50) | 7 (3.07) | 8 (3.07)  |
| 29 | 43,224,753 | rs29013208 | 8 (2.92)  | 6 (2.71) | 7 (2.68) | 7 (2.61) | 6 (3.06) | 8 (3.35)  |
| 29 | 43,269,744 | ss86282762 | 7 (2.83)  | 5 (2.57) | 6 (2.86) | 6 (2.66) | 6 (1.80) | 7 (3.23)  |
| 29 | 43,304,256 | rs29024708 | 7 (3.26)  | 5 (3.05) | 7 (3.04) | 6 (3.16) | 5 (2.25) | 7 (3.62)  |
| 29 | 43,328,607 | ss86295061 | 7 (4.00)  | 7 (3.65) | 5 (3.71) | 6 (4.22) | 5 (3.17) | 7 (3.83)  |
| 29 | 43,429,511 | ss86318094 | 8 (4.72)  | 8 (4.52) | 6 (3.85) | 7 (5.13) | 6 (3.17) | 8 (4.74)  |
| 29 | 43,466,342 | ss86310741 | 8 (5.38)  | 7 (4.56) | 7 (5.75) | 6 (5.46) | 7 (3.18) | 8 (5.07)  |
| 29 | 43,498,073 | ss86338800 | 8 (6.21)  | 8 (6.12) | 8 (6.03) | 7 (6.12) | 7 (3.37) | 8 (6.18)  |
| 29 | 43,611,640 | ss86298040 | 9 (6.18)  | 8 (5.89) | 8 (5.38) | 9 (6.26) | 7 (3.47) | 8 (6.39)  |
| 29 | 43,652,252 | ss86327310 | 7 (5.32)  | 7 (6.32) | 7 (3.74) | 7 (5.34) | 7 (3.61) | 7 (6.21)  |
| 29 | 43,686,401 | ss86325323 | 7 (5.06)  | 6 (4.83) | 6 (4.88) | 7 (5.03) | 6 (4.20) | 6 (4.67)  |
| 29 | 43,709,769 | ss86290081 | 7 (4.64)  | 6 (4.69) | 6 (3.82) | 7 (4.94) | 6 (4.33) | 6 (4.83)  |
| 29 | 43,747,765 | rs42190085 | 7 (4.82)  | 7 (5.00) | 7 (2.85) | 7 (5.67) | 7 (4.82) | 7 (5.78)  |
| 29 | 43,749,527 | ss86299346 | 7 (4.47)  | 6 (5.42) | 6 (2.75) | 7 (5.42) | 7 (3.53) | 7 (5.49)  |
| 29 | 43,777,249 | ss86299989 | 6 (4.53)  | 6 (4.94) | 5 (3.06) | 6 (4.70) | 6 (3.13) | 6 (4.50)  |
| 29 | 43,826,144 | rs42191289 | 6 (4.42)  | 6 (4.50) | 6 (4.17) | 6 (3.93) | 6 (3.55) | 6 (4.53)  |
| 29 | 43,839,783 | ss86336460 | 7 (4.67)  | 6 (4.35) | 7 (4.21) | 6 (4.43) | 6 (3.70) | 7 (4.60)  |
| 29 | 43,914,923 | ss86335514 | 8 (4.57)  | 7 (4.10) | 7 (3.53) | 7 (4.69) | 6 (4.87) | 8 (4.86)  |
| 29 | 44,000,728 | rs42191319 | 8 (4.52)  | 7 (4.03) | 7 (4.33) | 6 (4.39) | 6 (4.59) | 6 (4.30)  |
| 29 | 44,029,526 | rs42192038 | 7 (3.76)  | 7 (3.19) | 7 (3.53) | 7 (3.70) | 6 (4.11) | 7 (3.44)  |
| 29 | 44,042,363 | rs42192064 | 7 (3.22)  | 6 (2.55) | 6 (2.95) | 5 (3.11) | 5 (4.09) | 5 (3.43)  |
| 29 | 44,049,244 | rs42192077 | 6 (3.30)  | 5 (2.98) | 6 (3.08) | 4 (3.34) | 4 (3.04) | 5 (3.32)  |
| 29 | 44,050,471 | ss86284058 | 6 (3.66)  | 6 (3.10) | 6 (3.14) | 6 (3.50) | 6 (2.36) | 6 (3.44)  |
| 29 | 44,051,567 | rs42192079 | 6 (3.10)  | 6 (2.97) | 5 (2.85) | 5 (3.26) | 4 (2.30) | 6 (2.95)  |
| 29 | 44,053,733 | rs42192083 | 6 (3.14)  | 6 (2.88) | 5 (2.91) | 5 (3.30) | 4 (3.03) | 6 (3.17)  |
| 29 | 44,054,901 | rs42192084 | 6 (2.71)  | 6 (2.42) | 5 (2.46) | 5 (2.88) | 4 (2.29) | 6 (2.92)  |
| 29 | 44,058,688 | rs42192090 | 5 (2.17)  | 5 (2.64) | 5 (1.68) | 5 (2.39) | 4 (1.91) | 4 (2.24)  |
| 29 | 44,060,410 | rs42192096 | 6 (2.07)  | 4 (2.28) | 5 (1.51) | 6 (2.39) | 5 (2.04) | 5 (2.70)  |
| 29 | 44,062,694 | rs42192100 | 6 (1.87)  | 5 (1.62) | 6 (1.67) | 5 (2.21) | 5 (1.63) | 6 (2.45)  |
| 29 | 44,063,938 | rs17872078 | 7 (3.06)  | 5 (3.19) | 7 (2.19) | 5 (3.33) | 6 (2.84) | 6 (3.61)  |
| 29 | 44,067,234 | rs17872093 | 7 (3.22)  | 6 (2.81) | 7 (2.57) | 6 (3.80) | 6 (2.67) | 6 (3.97)  |
| 29 | 44,067,796 | rs17871984 | 8 (3.00)  | 7 (2.79) | 8 (2.45) | 7 (3.31) | 7 (2.14) | 7 (4.12)  |
| 29 | 44,068,143 | rs17870631 | 9 (2.95)  | 7 (2.76) | 8 (2.45) | 7 (3.27) | 6 (2.11) | 8 (3.78)  |
| 29 | 44,068,346 | rs17870628 | 9 (2.09)  | 7 (2.44) | 7 (1.58) | 6 (2.29) | 5 (1.68) | 8 (2.57)  |
| 29 | 44,068,445 | rs17870626 | 7 (1.79)  | 7 (2.34) | 6 (1.47) | 6 (1.80) | 4 (1.56) | 6 (1.88)  |
| 29 | 44,068,519 | rs17872010 | 7 (2.87)  | 6 (2.98) | 6 (2.39) | 7 (3.04) | 6 (2.14) | 6 (3.35)  |
| 29 | 44,068,580 | rs17872004 | 6 (1.85)  | 6 (2.27) | 6 (1.54) | 5 (1.78) | 6 (1.66) | 5 (2.04)  |
| 29 | 44,068,812 | rs17872003 | 6 (1.42)  | 5 (1.52) | 6 (1.41) | 5 (1.35) | 6 (1.28) | 6 (1.51)  |
| 29 | 44,069,063 | rs17812000 | 7 (1.81)  | 5 (2.37) | 6 (1.55) | 5 (1.68) | 5 (1.48) | 7 (1.94)  |
| 29 | 44,069,177 | rs17872006 | 6 (2.40)  | 5 (2.81) | 6 (2.38) | 5 (2.40) | 6 (1.78) | 6 (1.98)  |
| 29 | 44,070,713 | rs42192103 | 8 (3.14)  | 7 (3.26) | 7 (2.99) | 7 (3.00) | 8 (2.16) | 8 (2.99)  |
| 29 | 44,070,881 | rs42192105 | 9 (4.11)  | 8 (3.75) | 8 (3.22) | 8 (4.32) | 8 (3.14) | 9 (4.12)  |
| 29 | 44,071,034 | rs42192107 | 9 (5.26)  | 8 (4.70) | 8 (3.85) | 8 (5.55) | 8 (4.26) | 9 (5.45)  |
| 29 | 44,071,135 | rs42192108 | 9 (4.51)  | 8 (4.05) | 7 (3.83) | 7 (3.50) | 9 (4.44) | 8 (4.09)  |
| 29 | 44,071,593 | rs42192109 | 8 (3.86)  | 8 (3.84) | 6 (3.54) | 7 (3.19) | 8 (2.63) | 7 (3.44)  |
| 29 | 44,085,642 | rs17871051 | 8 (3.97)  | 8 (3.91) | 6 (3.27) | 6 (3.65) | 7 (3.31) | 7 (4.06)  |
| 29 | 44,085,769 | rs17871058 | 7 (4.11)  | 7 (3.61) | 6 (3.52) | 6 (3.60) | 6 (3.90) | 6 (4.06)  |
| 29 | 44,087,205 | rs17872032 | 7 (2.73)  | 6 (2.16) | 5 (2.41) | 6 (2.80) | 6 (2.49) | 6 (3.11)  |
| 29 | 44,087,356 | rs17872033 | 7 (3.33)  | 7 (2.69) | 6 (3.23) | 6 (3.11) | 6 (3.69) | 7 (3.57)  |
| 29 | 44,087,629 | rs17872050 | 7 (3.16)  | 6 (3.00) | 6 (2.79) | 6 (3.32) | 5 (3.73) | 7 (3.14)  |
| 29 | 44,087,858 | rs17872151 | 7 (2.86)  | 7 (2.96) | 6 (2.69) | 6 (2.88) | 5 (3.20) | 7 (2.69)  |

|    |            |             |          |          |          |          |          |          |
|----|------------|-------------|----------|----------|----------|----------|----------|----------|
| 29 | 44,088,897 | rs17870847  | 7 (3.41) | 6 (2.81) | 6 (3.30) | 6 (3.61) | 6 (3.93) | 7 (3.11) |
| 29 | 44,110,295 | rs42192119  | 6 (3.29) | 6 (2.70) | 5 (2.96) | 5 (3.80) | 5 (3.73) | 6 (3.14) |
| 29 | 44,119,671 | rs42195143  | 6 (2.73) | 5 (2.50) | 5 (2.91) | 5 (2.66) | 5 (3.19) | 6 (2.33) |
| 29 | 44,122,272 | rs42194216  | 6 (3.40) | 5 (2.63) | 6 (3.39) | 6 (3.36) | 6 (3.65) | 6 (3.20) |
| 29 | 44,125,747 | rs42194178  | 6 (3.53) | 6 (2.80) | 6 (3.64) | 6 (3.54) | 6 (3.56) | 6 (3.22) |
| 29 | 44,130,887 | rs42194132  | 7 (3.30) | 5 (2.59) | 5 (3.65) | 6 (3.38) | 5 (3.42) | 7 (3.05) |
| 29 | 44,154,126 | rs42193349  | 7 (3.43) | 6 (2.85) | 6 (3.07) | 7 (3.84) | 6 (3.38) | 7 (3.97) |
| 29 | 44,172,614 | ss117965984 | 7 (3.38) | 5 (2.73) | 5 (3.23) | 7 (3.34) | 6 (2.57) | 6 (3.61) |
| 29 | 44,196,154 | ss86318958  | 7 (3.43) | 5 (3.27) | 5 (3.29) | 6 (3.29) | 6 (2.81) | 6 (3.56) |
| 29 | 44,208,978 | rs29003633  | 8 (3.58) | 6 (3.65) | 6 (3.21) | 7 (3.24) | 7 (3.19) | 6 (3.63) |
| 29 | 44,223,148 | ss86323783  | 8 (3.87) | 7 (3.61) | 7 (2.87) | 7 (3.90) | 8 (4.32) | 7 (4.22) |
| 29 | 44,243,444 | ss86313099  | 8 (4.51) | 8 (3.85) | 8 (3.91) | 8 (3.93) | 8 (4.86) | 8 (4.48) |
| 29 | 44,325,408 | ss86292140  | 8 (3.88) | 8 (2.40) | 8 (3.56) | 8 (4.31) | 8 (4.87) | 8 (4.02) |
| 29 | 44,372,611 | ss86329852  | 8 (3.84) | 7 (3.23) | 8 (3.51) | 7 (4.19) | 7 (4.60) | 7 (3.80) |
| 29 | 44,395,075 | ss86333994  | 8 (3.87) | 7 (3.25) | 8 (3.61) | 7 (4.23) | 7 (4.71) | 7 (3.86) |
| 29 | 44,416,282 | rs43709648  | 8 (4.31) | 7 (3.21) | 8 (3.88) | 8 (5.07) | 7 (4.95) | 8 (4.50) |
| 29 | 44,546,564 | ss86288185  | 8 (4.92) | 7 (4.21) | 7 (4.75) | 8 (5.14) | 8 (4.49) | 8 (4.64) |
| 29 | 44,585,782 | ss86341172  | 9 (3.72) | 8 (2.79) | 8 (4.09) | 8 (3.58) | 9 (4.63) | 9 (3.25) |
| 29 | 44,628,137 | rs41600300  | 9 (4.29) | 8 (3.15) | 8 (4.14) | 8 (3.57) | 9 (4.53) | 9 (3.86) |
| 29 | 44,649,908 | ss86337530  | 8 (4.23) | 6 (3.25) | 8 (3.98) | 7 (4.06) | 7 (4.28) | 8 (3.60) |
| 29 | 44,740,917 | ss86334185  | 8 (3.53) | 7 (3.16) | 7 (2.90) | 7 (3.23) | 7 (3.91) | 8 (3.46) |
| 29 | 44,807,928 | ss117965824 | 8 (3.56) | 8 (2.83) | 7 (2.99) | 7 (3.54) | 7 (4.67) | 8 (4.23) |
| 29 | 44,853,970 | rs42192429  | 7 (4.05) | 7 (4.15) | 7 (3.07) | 7 (4.22) | 7 (4.08) | 7 (4.47) |
| 29 | 44,900,940 | rs43706228  | 8 (4.12) | 8 (4.04) | 7 (3.13) | 8 (4.32) | 7 (4.58) | 8 (4.25) |
| 29 | 44,969,518 | ss86337154  | 8 (4.45) | 8 (4.24) | 8 (3.82) | 8 (4.46) | 7 (4.60) | 8 (4.57) |
| 29 | 44,979,377 | ss86338214  | 7 (4.14) | 7 (3.79) | 7 (4.21) | 7 (3.71) | 6 (4.61) | 7 (4.08) |
| 29 | 44,999,264 | ss86310727  | 7 (3.92) | 7 (3.51) | 7 (2.74) | 6 (3.27) | 6 (3.90) | 7 (4.34) |
| 29 | 45,023,665 | ss86338763  | 7 (4.03) | 6 (3.94) | 7 (3.90) | 6 (3.19) | 6 (4.38) | 7 (4.21) |
| 29 | 45,102,557 | ss86332221  | 7 (3.53) | 7 (3.34) | 7 (2.88) | 7 (3.65) | 7 (4.83) | 7 (3.92) |
| 29 | 45,129,099 | ss86335405  | 7 (4.16) | 7 (4.25) | 6 (3.72) | 6 (4.41) | 6 (3.77) | 7 (4.25) |
| 29 | 45,187,114 | ss86295760  | 6 (4.30) | 6 (3.97) | 6 (3.68) | 6 (4.83) | 5 (3.52) | 6 (4.10) |
| 29 | 45,287,502 | ss86312485  | 6 (4.45) | 6 (3.35) | 6 (3.93) | 6 (4.76) | 6 (3.23) | 6 (4.87) |
| 29 | 45,326,585 | rs42198683  | 7 (4.08) | 6 (3.24) | 5 (3.51) | 6 (4.34) | 5 (3.09) | 6 (4.52) |
| 29 | 45,367,095 | ss86322638  |          |          |          |          |          |          |
| 29 | 45,458,280 | rs43706176  |          |          |          |          |          |          |
| 29 | 45,482,143 | rs29025626  |          |          |          |          |          |          |
| 29 | 45,530,264 | ss86341375  |          |          |          |          |          |          |

<sup>1</sup>UMD3.1 Coordinates. SNPs located within *CAST* and *CAPN1* are shaded in yellow.

<sup>2</sup>Commercialized SNPs are shaded in red.

<sup>3</sup>GBLUP allele substitution effect ( $\alpha$ ) ranks. Values less than 500 are shaded in yellow for the across-breed and green

<sup>4</sup>GBLUP of SNP allele substitution effects ( $\alpha$ ) estimated as a random effect.

<sup>5</sup>SNP allele substitution effects ( $\beta$ ) estimated as fixed effects in a mixed linear model including the genomic relation

<sup>6</sup> $-\log_{10}(P)$ -value for the test of the null hypothesis of an allele substitution effect ( $\beta$ ) of zero. Maximum values are sh

<sup>7</sup> $-\log_{10}(P)$ -value for the test of the null hypothesis of all haplotype substitution effects (H) being zero. Maximum val

<sup>8</sup>Number of haplotypes and effective number of haplotypes in parentheses for the 13 (*CAST*) or 31 (*CAPN1*) SNP b

<sup>9</sup>Number Percentage of phenotypic variation in WBSF explained by haplotypes centered on the identified SNP.

|     |                  |                     |            |        |          | % V <sub>p</sub> explained <sup>9</sup> |          |           |  |  |
|-----|------------------|---------------------|------------|--------|----------|-----------------------------------------|----------|-----------|--|--|
| BTA | POS <sup>1</sup> | SNP ID <sup>2</sup> | All Breeds | Angus  | Hereford | Charolais                               | Limousin | Simmental |  |  |
| 7   | 97,151,592       | rs41656985          |            |        |          |                                         |          |           |  |  |
| 7   | 97,261,052       | rs41656987          |            |        |          |                                         |          |           |  |  |
| 7   | 97,372,656       | rs41570922          |            |        |          |                                         |          |           |  |  |
| 7   | 97,393,157       | rs41615915          |            |        |          |                                         |          |           |  |  |
| 7   | 97,430,691       | ss86295638          | 0.1069     | 0.3348 | 0.3181   | 0.2968                                  | 2.9028   | 0.5612    |  |  |
| 7   | 97,501,859       | ss86310801          | 0.1916     | 0.2039 | 0.3081   | 0.2291                                  | 3.8762   | 0.5472    |  |  |
| 7   | 97,529,872       | ss61472319          | 0.3281     | 0.2727 | 0.8707   | 0.2474                                  | 3.0739   | 0.8633    |  |  |
| 7   | 97,691,853       | ss86290016          | 0.2342     | 0.1155 | 0.7879   | 0.1839                                  | 2.7549   | 0.1346    |  |  |
| 7   | 97,772,240       | ss86312419          | 0.2042     | 0.1218 | 0.5156   | 0.0972                                  | 3.3667   | 1.3058    |  |  |
| 7   | 97,861,341       | rs41593284          | 0.1991     | 0.2543 | 0.8272   | 0.8832                                  | 4.0170   | 1.5665    |  |  |
| 7   | 97,898,940       | rs41593281          | 0.1880     | 0.2159 | 0.3170   | 0.4538                                  | 2.0289   | 1.6484    |  |  |
| 7   | 97,961,659       | ss117969141         | 0.2257     | 0.3903 | 0.5856   | 0.5680                                  | 2.9404   | 1.3240    |  |  |
| 7   | 98,013,150       | ss117968909         | 0.2944     | 0.3231 | 0.7719   | 0.7887                                  | 3.0408   | 1.1337    |  |  |
| 7   | 98,173,299       | ss86290989          | 0.6082     | 0.2174 | 1.5111   | 0.5415                                  | 1.2811   | 2.2421    |  |  |
| 7   | 98,194,828       | rs41658549          | 0.7887     | 0.7155 | 1.5810   | 0.6017                                  | 2.1868   | 2.0381    |  |  |
| 7   | 98,254,815       | rs41658542          | 0.8412     | 0.7193 | 1.7833   | 0.4899                                  | 2.8748   | 2.7163    |  |  |
| 7   | 98,375,640       | ss86329349          | 0.6480     | 0.5146 | 1.7002   | 0.3179                                  | 2.6146   | 2.7748    |  |  |
| 7   | 98,495,888       | rs43529872          | 1.0168     | 1.3608 | 1.9218   | 1.8626                                  | 3.2645   | 1.9619    |  |  |
| 7   | 98,498,047       | ss86321563          | 0.6907     | 0.6996 | 1.6994   | 0.9652                                  | 2.2145   | 1.7102    |  |  |
| 7   | 98,538,952       | rs41660170          | 0.6994     | 0.8205 | 1.8942   | 2.0957                                  | 1.4259   | 2.4906    |  |  |
| 7   | 98,566,391       | ss117962527         | 0.6561     | 0.6368 | 1.8793   | 1.3322                                  | 2.1184   | 0.8685    |  |  |
| 7   | 98,579,574       | rs41255587          | 0.5320     | 0.5029 | 1.5045   | 1.1954                                  | 1.7032   | 1.1394    |  |  |
| 7   | 98,635,208       | ss86300200          | 0.3645     | 0.4199 | 1.3981   | 0.9644                                  | 3.6388   | 0.3863    |  |  |
| 7   | 98,646,770       | rs41596489          | 0.5032     | 0.3066 | 1.1240   | 0.6743                                  | 1.6654   | 1.6151    |  |  |
| 7   | 98,680,293       | ss86315737          | 0.2711     | 0.4693 | 0.6606   | 0.6184                                  | 3.4188   | 1.6557    |  |  |
| 7   | 98,726,055       | rs29018251          | 0.4022     | 0.0532 | 1.3334   | 1.0384                                  | 0.5667   | 2.4458    |  |  |
| 7   | 98,757,265       | ss86303738          | 0.0872     | 0.0489 | 0.5442   | 0.2399                                  | 0.4469   | 1.3233    |  |  |
| 7   | 98,820,742       | ss86324113          | 0.2221     | 0.0468 | 0.6508   | 0.5775                                  | 0.7773   | 0.4901    |  |  |
| 7   | 98,887,313       | rs41568595          | 0.2211     | 0.2870 | 1.0798   | 1.2957                                  | 1.2288   | 1.2300    |  |  |
| 7   | 98,907,404       | ss86291843          | 0.0623     | 0.0927 | 0.3782   | 0.7934                                  | 1.3305   | 0.7421    |  |  |
| 7   | 98,974,456       | ss86339659          | 0.1047     | 0.2045 | 0.4300   | 1.6508                                  | 3.5200   | 0.7290    |  |  |
| 7   | 99,024,444       | ss117968912         | 0.2343     | 0.4070 | 1.1508   | 1.8810                                  | 1.1603   | 0.2613    |  |  |
| 7   | 99,085,299       | rs41590403          | 0.2377     | 0.2211 | 1.0249   | 0.7492                                  | 0.9754   | 0.6307    |  |  |
| 7   | 99,130,598       | ss86333606          | 0.1205     | 0.0478 | 0.6514   | 0.5958                                  | 2.2676   | 0.3095    |  |  |
| 7   | 99,178,748       | rs41568774          | 0.1257     | 0.1654 | 0.3425   | 0.6688                                  | 0.7915   | 0.6747    |  |  |
| 7   | 99,215,474       | ss86324013          | 0.3063     | 0.2844 | 1.0966   | 0.4720                                  | 0.3325   | 1.1453    |  |  |
| 7   | 99,344,820       | rs41622872          | 0.1857     | 0.5936 | 0.6192   | 0.1349                                  | 1.6586   | 1.4045    |  |  |
| 7   | 99,399,852       | ss117968895         | 0.0522     | 0.0772 | 0.2063   | 0.0734                                  | 1.9788   | 0.1781    |  |  |
| 7   | 99,492,904       | ss86296856          | 0.1716     | 0.1178 | 0.3100   | 0.3185                                  | 1.8695   | 0.8208    |  |  |
| 7   | 99,635,841       | ss86339853          | 0.1240     | 0.1541 | 0.1788   | 0.3416                                  | 3.1080   | 0.8480    |  |  |
| 7   | 99,687,614       | rs41657025          |            |        |          |                                         |          |           |  |  |
| 7   | 99,845,133       | rs41624339          |            |        |          |                                         |          |           |  |  |
| 7   | 99,919,908       | ss86339607          |            |        |          |                                         |          |           |  |  |
| 7   | 100,015,468      | ss86310226          |            |        |          |                                         |          |           |  |  |
| 29  | 42,406,544       | ss86319674          |            |        |          |                                         |          |           |  |  |
| 29  | 42,455,680       | ss117974470         |            |        |          |                                         |          |           |  |  |
| 29  | 42,620,218       | rs42189770          |            |        |          |                                         |          |           |  |  |
| 29  | 42,651,294       | rs43706142          |            |        |          |                                         |          |           |  |  |
| 29  | 42,696,595       | rs42189112          | 0.0971     | 0.5927 | 0.1067   | 0.4390                                  | 0.9426   | 0.8560    |  |  |
| 29  | 42,749,808       | rs29020063          | 0.1618     | 0.7164 | 0.1655   | 0.6353                                  | 1.6734   | 2.4237    |  |  |
| 29  | 42,842,353       | ss117974486         | 0.2566     | 0.5694 | 0.6020   | 0.1532                                  | 0.9007   | 2.5806    |  |  |
| 29  | 42,897,144       | ss86322358          | 0.1998     | 1.2397 | 0.6377   | 0.3813                                  | 1.5694   | 2.2685    |  |  |

|    |            |            |        |        |        |        |        |        |  |  |
|----|------------|------------|--------|--------|--------|--------|--------|--------|--|--|
| 29 | 43,006,000 | ss86339964 | 0.2243 | 1.3464 | 0.5149 | 0.3115 | 2.8678 | 3.3851 |  |  |
| 29 | 43,043,207 | ss86341572 | 0.2150 | 1.2177 | 0.2691 | 0.2727 | 1.1606 | 2.9719 |  |  |
| 29 | 43,108,445 | ss86337140 | 0.2371 | 1.1154 | 0.0496 | 0.0485 | 1.0267 | 3.5414 |  |  |
| 29 | 43,129,250 | ss86337549 | 0.3180 | 1.7102 | 0.1659 | 0.2836 | 0.3402 | 2.3409 |  |  |
| 29 | 43,189,370 | ss86319044 | 0.2375 | 0.7152 | 0.6429 | 0.0879 | 1.1739 | 1.4806 |  |  |
| 29 | 43,224,753 | rs29013208 | 0.3705 | 1.2772 | 0.9855 | 0.0883 | 0.6477 | 1.6622 |  |  |
| 29 | 43,269,744 | ss86282762 | 0.4843 | 1.3414 | 1.0922 | 0.2052 | 1.5560 | 1.8456 |  |  |
| 29 | 43,304,256 | rs29024708 | 0.2190 | 0.6515 | 0.6304 | 0.2211 | 0.5122 | 2.3447 |  |  |
| 29 | 43,328,607 | ss86295061 | 0.2609 | 1.1412 | 0.2814 | 0.9226 | 0.1729 | 2.3193 |  |  |
| 29 | 43,429,511 | ss86318094 | 0.3438 | 1.7052 | 0.7278 | 0.7317 | 0.3052 | 2.7134 |  |  |
| 29 | 43,466,342 | ss86310741 | 0.1778 | 0.6858 | 0.6546 | 0.3277 | 0.1834 | 1.5918 |  |  |
| 29 | 43,498,073 | ss86338800 | 0.2699 | 1.4302 | 0.7505 | 0.6832 | 1.5707 | 1.1878 |  |  |
| 29 | 43,611,640 | ss86298040 | 0.3270 | 0.9183 | 0.6246 | 0.7037 | 1.9166 | 1.9407 |  |  |
| 29 | 43,652,252 | ss86327310 | 0.2851 | 1.2446 | 0.4059 | 0.8527 | 1.6756 | 2.0019 |  |  |
| 29 | 43,686,401 | ss86325323 | 0.3868 | 1.9641 | 0.5687 | 0.7995 | 0.1161 | 2.7630 |  |  |
| 29 | 43,709,769 | ss86290081 | 0.3391 | 2.4762 | 0.4812 | 0.7101 | 1.9074 | 3.2671 |  |  |
| 29 | 43,747,765 | rs42190085 | 0.2557 | 1.1582 | 0.6285 | 0.2086 | 2.1066 | 3.2947 |  |  |
| 29 | 43,749,527 | ss86299346 | 0.2107 | 0.5996 | 0.5609 | 0.5481 | 2.1140 | 2.3776 |  |  |
| 29 | 43,777,249 | ss86299989 | 0.3691 | 0.6800 | 0.7725 | 0.3275 | 2.9688 | 2.3050 |  |  |
| 29 | 43,826,144 | rs42191289 | 0.5797 | 0.6216 | 1.4613 | 0.5674 | 0.6505 | 2.0858 |  |  |
| 29 | 43,839,783 | ss86336460 | 0.1034 | 0.6447 | 0.6530 | 0.2815 | 0.6028 | 1.1670 |  |  |
| 29 | 43,914,923 | ss86335514 | 0.1333 | 0.6012 | 0.2374 | 0.5500 | 0.7245 | 2.0326 |  |  |
| 29 | 44,000,728 | rs42191319 | 0.1921 | 0.1353 | 0.4667 | 0.5837 | 0.6951 | 1.4871 |  |  |
| 29 | 44,029,526 | rs42192038 | 0.1275 | 0.3279 | 0.3417 | 0.6893 | 1.0148 | 1.1975 |  |  |
| 29 | 44,042,363 | rs42192064 | 0.0646 | 0.1550 | 0.4965 | 0.4318 | 0.1630 | 0.2726 |  |  |
| 29 | 44,049,244 | rs42192077 | 0.2041 | 0.5438 | 0.5527 | 0.6122 | 0.0954 | 1.0924 |  |  |
| 29 | 44,050,471 | ss86284058 | 0.2310 | 0.7920 | 0.4733 | 0.4115 | 1.0465 | 2.6991 |  |  |
| 29 | 44,051,567 | rs42192079 | 0.3953 | 0.7053 | 1.0313 | 0.4786 | 0.0496 | 3.5538 |  |  |
| 29 | 44,053,733 | rs42192083 | 0.4032 | 1.0252 | 0.6287 | 0.5270 | 0.4525 | 3.6792 |  |  |
| 29 | 44,054,901 | rs42192084 | 1.1142 | 1.3904 | 1.9370 | 1.3357 | 0.4794 | 2.7195 |  |  |
| 29 | 44,058,688 | rs42192090 | 0.7568 | 0.7332 | 2.0917 | 1.4072 | 0.2471 | 2.7775 |  |  |
| 29 | 44,060,410 | rs42192096 | 0.0489 | 0.5181 | 0.9330 | 0.7528 | 1.0922 | 0.4018 |  |  |
| 29 | 44,062,694 | rs42192100 | 1.1801 | 0.9229 | 2.5851 | 0.8142 | 1.1448 | 2.3275 |  |  |
| 29 | 44,063,938 | rs17872078 | 1.2277 | 0.8836 | 2.4599 | 1.1151 | 0.6002 | 2.9079 |  |  |
| 29 | 44,067,234 | rs17872093 | 1.6207 | 2.2689 | 2.3735 | 1.5350 | 0.9956 | 5.0523 |  |  |
| 29 | 44,067,796 | rs17871984 | 1.8030 | 2.1985 | 2.5524 | 1.9766 | 1.2721 | 5.1526 |  |  |
| 29 | 44,068,143 | rs17870631 | 1.8519 | 2.3525 | 2.4650 | 1.9660 | 0.9285 | 5.3481 |  |  |
| 29 | 44,068,346 | rs17870628 | 1.3353 | 1.9642 | 1.3739 | 1.8383 | 0.7218 | 4.2853 |  |  |
| 29 | 44,068,445 | rs17870626 | 1.3634 | 3.1851 | 1.5340 | 1.8558 | 0.6257 | 3.9445 |  |  |
| 29 | 44,068,519 | rs17872010 | 1.4843 | 3.1839 | 2.3279 | 2.1726 | 2.6316 | 4.4334 |  |  |
| 29 | 44,068,580 | rs17872004 | 0.6819 | 2.0162 | 1.6311 | 0.3337 | 0.9731 | 2.2337 |  |  |
| 29 | 44,068,812 | rs17872003 | 0.2756 | 0.9369 | 0.7108 | 0.7401 | 0.7367 | 1.1522 |  |  |
| 29 | 44,069,063 | rs17812000 | 1.0159 | 2.3693 | 1.1396 | 1.2239 | 0.4688 | 4.6553 |  |  |
| 29 | 44,069,177 | rs17872006 | 1.2804 | 2.5017 | 1.6476 | 1.7458 | 2.0917 | 4.4879 |  |  |
| 29 | 44,070,713 | rs42192103 | 1.2167 | 2.3723 | 1.9232 | 1.9906 | 2.8836 | 4.3459 |  |  |
| 29 | 44,070,881 | rs42192105 | 1.4070 | 2.6580 | 2.2227 | 2.7550 | 3.5215 | 4.2918 |  |  |
| 29 | 44,071,034 | rs42192107 | 1.3879 | 2.5015 | 2.0222 | 2.6817 | 1.5437 | 4.5974 |  |  |
| 29 | 44,071,135 | rs42192108 | 0.4005 | 1.3964 | 0.9437 | 0.7492 | 1.7837 | 1.5178 |  |  |
| 29 | 44,071,593 | rs42192109 | 0.3764 | 1.2252 | 0.8942 | 0.7841 | 2.1647 | 0.6059 |  |  |
| 29 | 44,085,642 | rs17871051 | 0.3539 | 1.6836 | 0.2326 | 1.4792 | 2.5763 | 3.1650 |  |  |
| 29 | 44,085,769 | rs17871058 | 0.7367 | 2.9196 | 1.3546 | 1.4674 | 2.6655 | 2.9538 |  |  |
| 29 | 44,087,205 | rs17872032 | 0.7179 | 2.5865 | 0.6547 | 0.9348 | 2.7454 | 2.9682 |  |  |
| 29 | 44,087,356 | rs17872033 | 0.3732 | 1.1418 | 0.5388 | 0.3120 | 2.9878 | 1.9136 |  |  |
| 29 | 44,087,629 | rs17872050 | 0.3993 | 0.6251 | 0.6325 | 0.9748 | 1.6848 | 2.2658 |  |  |
| 29 | 44,087,858 | rs17872151 | 0.2942 | 0.6947 | 0.9837 | 0.3630 | 0.8176 | 1.4608 |  |  |

|    |            |             |        |        |        |        |        |        |  |  |
|----|------------|-------------|--------|--------|--------|--------|--------|--------|--|--|
| 29 | 44,088,897 | rs17870847  | 0.0699 | 0.4757 | 0.2390 | 0.4133 | 0.2829 | 0.0973 |  |  |
| 29 | 44,110,295 | rs42192119  | 0.2301 | 0.5087 | 0.1788 | 0.6008 | 0.2157 | 1.7515 |  |  |
| 29 | 44,119,671 | rs42195143  | 0.1902 | 0.3015 | 0.5057 | 0.1852 | 0.4199 | 0.7790 |  |  |
| 29 | 44,122,272 | rs42194216  | 0.3200 | 0.2749 | 0.6289 | 1.3313 | 0.7139 | 1.8567 |  |  |
| 29 | 44,125,747 | rs42194178  | 0.2934 | 0.2900 | 0.2223 | 1.4256 | 0.5045 | 2.0344 |  |  |
| 29 | 44,130,887 | rs42194132  | 0.2816 | 0.2694 | 0.2685 | 0.9360 | 0.8166 | 2.1318 |  |  |
| 29 | 44,154,126 | rs42193349  | 0.1469 | 1.3176 | 0.0735 | 0.3572 | 1.1035 | 1.0763 |  |  |
| 29 | 44,172,614 | ss117965984 | 0.0837 | 1.1845 | 0.5237 | 1.3592 | 0.4293 | 0.8918 |  |  |
| 29 | 44,196,154 | ss86318958  | 0.2808 | 0.7172 | 0.9353 | 0.2450 | 0.2646 | 2.2890 |  |  |
| 29 | 44,208,978 | rs29003633  | 0.3164 | 1.2198 | 0.4870 | 0.2434 | 0.3088 | 1.7895 |  |  |
| 29 | 44,223,148 | ss86323783  | 0.2804 | 0.4551 | 1.3181 | 0.5502 | 0.6021 | 2.3560 |  |  |
| 29 | 44,243,444 | ss86313099  | 0.2925 | 0.6766 | 1.3772 | 0.6640 | 1.3068 | 1.8720 |  |  |
| 29 | 44,325,408 | ss86292140  | 0.7977 | 1.0914 | 1.6889 | 1.4586 | 1.6338 | 1.9225 |  |  |
| 29 | 44,372,611 | ss86329852  | 0.2686 | 0.2614 | 1.5797 | 0.2443 | 1.8282 | 1.2962 |  |  |
| 29 | 44,395,075 | ss86333994  | 0.2678 | 0.4591 | 1.5946 | 0.3017 | 1.6760 | 1.2776 |  |  |
| 29 | 44,416,282 | rs43709648  | 0.2816 | 1.1864 | 0.8254 | 0.6576 | 0.3649 | 2.0519 |  |  |
| 29 | 44,546,564 | ss86288185  | 0.6589 | 1.3387 | 1.7776 | 0.6043 | 0.3169 | 2.6192 |  |  |
| 29 | 44,585,782 | ss86341172  | 0.4103 | 0.8473 | 0.6801 | 0.6665 | 0.5738 | 1.7507 |  |  |
| 29 | 44,628,137 | rs41600300  | 0.1818 | 1.1516 | 0.5392 | 0.3301 | 2.4348 | 2.3067 |  |  |
| 29 | 44,649,908 | ss86337530  | 0.2174 | 0.6102 | 0.7810 | 0.9018 | 1.3420 | 2.3320 |  |  |
| 29 | 44,740,917 | ss86334185  | 0.1446 | 1.2352 | 0.3330 | 0.3502 | 0.8755 | 1.7962 |  |  |
| 29 | 44,807,928 | ss117965824 | 0.3468 | 1.6097 | 0.1538 | 1.4348 | 0.7054 | 1.5679 |  |  |
| 29 | 44,853,970 | rs42192429  | 0.3331 | 2.1742 | 0.6054 | 0.2857 | 2.2915 | 1.7928 |  |  |
| 29 | 44,900,940 | rs43706228  | 0.3513 | 1.7453 | 0.7563 | 0.5117 | 2.2357 | 1.1298 |  |  |
| 29 | 44,969,518 | ss86337154  | 0.3245 | 2.1719 | 0.5930 | 0.9527 | 1.4366 | 0.5132 |  |  |
| 29 | 44,979,377 | ss86338214  | 0.1435 | 0.9229 | 0.6287 | 0.4160 | 0.9712 | 1.0971 |  |  |
| 29 | 44,999,264 | ss86310727  | 0.1378 | 0.1383 | 0.4188 | 0.7578 | 0.7855 | 0.8074 |  |  |
| 29 | 45,023,665 | ss86338763  | 0.2031 | 1.1662 | 0.4889 | 1.5674 | 0.4774 | 1.2544 |  |  |
| 29 | 45,102,557 | ss86332221  | 0.1543 | 0.7558 | 0.4168 | 1.7026 | 1.0905 | 1.5001 |  |  |
| 29 | 45,129,099 | ss86335405  | 0.0505 | 0.4551 | 0.2156 | 0.8526 | 0.6079 | 0.3385 |  |  |
| 29 | 45,187,114 | ss86295760  | 0.4511 | 0.3444 | 1.4206 | 0.8089 | 0.4334 | 0.5176 |  |  |
| 29 | 45,287,502 | ss86312485  | 0.2321 | 1.1501 | 1.0889 | 0.5532 | 0.7580 | 1.4601 |  |  |
| 29 | 45,326,585 | rs42198683  | 0.2840 | 1.0424 | 0.9296 | 0.6741 | 0.9232 | 1.0704 |  |  |
| 29 | 45,367,095 | ss86322638  |        |        |        |        |        |        |  |  |
| 29 | 45,458,280 | rs43706176  |        |        |        |        |        |        |  |  |
| 29 | 45,482,143 | rs29025626  |        |        |        |        |        |        |  |  |
| 29 | 45,530,264 | ss86341375  |        |        |        |        |        |        |  |  |

<sup>1</sup>UMD3.1 Coordinates. SNPs located within *CAST* and *CAPN1* are shaded in yellow.

<sup>2</sup>Commercialized SNPs are shaded in red.

<sup>3</sup>GBLUP allele substitution effect ( $\alpha$ ) ranks. Values less than 500 are shaded in yellow for the across-breed and green for the within-breed

<sup>4</sup>GBLUP of SNP allele substitution effects ( $\alpha$ ) estimated as a random effect.

<sup>5</sup>SNP allele substitution effects ( $\beta$ ) estimated as fixed effects in a mixed linear model including the genomic relationship matrix.

<sup>6</sup> $-\log_{10}(P)$ -value for the test of the null hypothesis of an allele substitution effect ( $\beta$ ) of zero. Maximum values are shaded in red. Other large

<sup>7</sup> $-\log_{10}(P)$ -value for the test of the null hypothesis of all haplotype substitution effects ( $H$ ) being zero. Maximum values are shaded in red.

<sup>8</sup>Number of haplotypes and effective number of haplotypes in parentheses for the 13 (*CAST*) or 31 (*CAPN1*) SNP block centered on the identified

<sup>9</sup>Number Percentage of phenotypic variation in WBSF explained by haplotypes centered on the identified SNP.
